# Supplementary material
Source: PubMed Central journal article supplement (PMC4217399)
Supplement: pnas.1404386111.sapp.pdf [file pnas.1404386111.sapp.pdf]

1 **Supplementary Methods for**  
2  
3 **Impact and cost-effectiveness of new tuberculosis vaccines in low- and middle-income**  
4 **countries**

5 Gwenan M. Knight, Ulla K. Griffiths, Tom Sumner, Yoko Laurence, Adrian Gheorghe, Anna  
6 Vassall, Philippe Glaziou, Richard G. White

7  
8

9 **Modelling methods**

- 10 (1) Modelling methods in full (Figures S1-S3) (pages 2-9)
- 11 (2) Model calibration (Figures S4-S5) (pages 10-13)
- 12 (3) Combining country level outputs for income group results (page 12)
- 13 (4) Model equations in full (pages 14-18)

14

15 **Parameters**

- 16 (5) Natural history and vaccine cost parameters (Table S1) (pages 19-24)
- 17 (6) Countries excluded and why (Table S2) (pages 25-26)
- 18 (7) Country level parameters (Table S3) (pages 27-31)

19

20 **Additional results**

- 21 (8) Vaccine impact in LMIC and UMIC (Figure S6, Table S4) (page 32-33)
- 22 (9) Sensitivity and uncertainty analysis (Figures S7-11, Tables S5-6) (pages 34-40)

23

24 **Cost-effectiveness methods**

- 25 (10) Cost-effective vaccine price calculations (pages 41-42)
- 26 (11) DALY calculations (page 42)
- 27 (12) TB vaccine prices and delivery costs assumptions (Table S7) (page 43)

28

29 **Cost-effectiveness parameters**

- 30 (13) Treatment costs (Tables S8-S11, Figures S12-S13) (pages 44-51)
- 31 (14) Productivity costs (Tables S12-S14, Figure S14) (pages 52-55)

32

33 **References** (page 56)

34  
35  
36

## 37 (1) Modelling methods in full

38

### 39 **Methods**

40 Two settings were considered: a base case ‘no new vaccine’ and a ‘new vaccine’ setting.  
41 BCG (the current infant TB vaccine) vaccination was assumed to continue at current levels in  
42 both settings and is included in the estimates of TB burden to which the model was calibrated.  
43 BCG has consistently been shown to be efficacious against primary progressive disease (1)  
44 and hence is likely to continue to be given even with the introduction of a TB vaccine against  
45 progression to pulmonary disease. Full parameter values are given in Table S1. The model  
46 was programmed in ‘R’ (2).

### 47 *Population and epidemiological data*

48 Estimates of the number of births and mortality rates (2009-2050), as well as age structure in  
49 2009 for each country were taken from the UN population division 2010 revision (3). The  
50 background mortality rate was stratified into discrete single year levels.

51 Tuberculosis incidence levels were taken from WHO estimates or calculated (for  
52 PLHIV) using WHO methods (4) (for full methods see Annex 1 of the 2013 Global TB  
53 Report (5)). Due to the higher levels of uncertainty in the HIV associated levels, the range  
54 from the estimates was multiplied by a factor of five. HIV incidence was derived from  
55 UNAIDS estimates (6). It was assumed that HIV incidence remains constant at country  
56 specific 2009 levels until 2050. This assumption has been made in other models of TB (7),  
57 and was made here in the light of the uncertainty in the impact of ART scale-up (8) and in  
58 order to be conservative in vaccine impact. We explore this assumption in scenario analysis.

59 Future improvements in case detection rates and treatment success for TB (4), as well  
60 as ART coverage were included. High targets for TB control have been set by the WHO,  
61 hence it is unlikely that TB control will not improve before 2025. To be conservative in terms  
62 of vaccine impact this scale-up gave a bigger decrease in TB incidence than the current (2%,  
63 since 2006) annual decline, but was less than an optimistic 10% annual decline (Figure S1). It  
64 was assumed that the improvements would increase the 2009 value by half the difference  
65 between the 2009 value and 100%, allowing for smaller improvements in coverage in  
66 countries with already high levels. The improvement was assumed to happen gradually (via a  
67 non-linear generalised logistic function) over the period 2012 to 2020, with 2009 levels prior  
68 to 2012, and 2020 levels kept constant until 2050 to allow time for TB burden to stabilise  
69 prior to vaccine introduction in 2024 (Figure S2, Table S3). The same scale-up was chosen  
70 for all countries for simplicity and ease of comparison, as well as uncertainty in differences at  
71 the country level. However, the relative scale-up (i.e. taking the 2009 value for the country)  
72 allows for the scale-up to reflect both how well the country is already doing and the difficulty  
73 of increasing already high levels of control. From 2020 onwards the values for TB control  
74 parameters were kept constant so that the only change to TB control after 2024 was use of a  
75 new vaccine. The change in these parameter inputs (shown in Figure S2) is reflected in the  
76 decrease in TB burden seen in Figures 1, S1 and S6.

### 77 *Income groups*

78 World Bank income group definitions were used (9). Low-income countries were  
79 those with 2011 GNI per capita of US\$ 1,025 or less; lower middle income has GNI per  
80 capita between US\$ 1,026 and US\$ 4,035; and upper middle-income between US\$4,036 and  
81 US\$ 12,475. There were 32 low-, 33 lower-middle- and 26 upper-middle-income countries in  
82 the final analysis (Table S2). The included countries account for 96.9% and 97.8% of  
83 reported TB incident cases and deaths respectively, in low- and middle-income countries in  
84 2009.

85 ***Study time period***

86 The study time period was from 2024, which is considered the earliest possible date  
87 for a new TB vaccine to be available (10). While a principle of economic evaluation is to  
88 include all costs and effects of any intervention being modelled, when using a transmission  
89 model there is a balance to be reached between capturing these effects and the increasing  
90 level of future uncertainty. We chose 2050 as an end point as this is the global target for TB  
91 elimination and thus best represents the current policy decision and investment timeframe.  
92 Halting the model output at 2050 caps the effect of the life-time duration of protection  
93 vaccines, making our incremental cost-effectiveness ratios (ICERs) specific to the 2024-2050  
94 time period. However, at this time point we already have a large level of uncertainty as to the  
95 burden of TB that will exist (what new tools may be introduced other than vaccines?) and the  
96 end point is the same for all vaccine profiles and target populations considered.

97 We investigated altering the end point for the ICER calculation and found that the  
98 discounted cost per DALY averted decreased with longer time horizons but that the rate of  
99 decrease was slowing by 2050 likely reflecting the impact of discounting. Interestingly, the  
100 ICERs calculated for the shorter duration adult targeted vaccines in 2045 were higher than in  
101 2040 and 2050, reflecting the costs but not the impact of the mass campaign that had yet to be  
102 seen in 2045.

103 An ICER was calculated for each model fit (see below for details), and the median of  
104 this set of ratios and 95% range is presented in the main text.

105

106

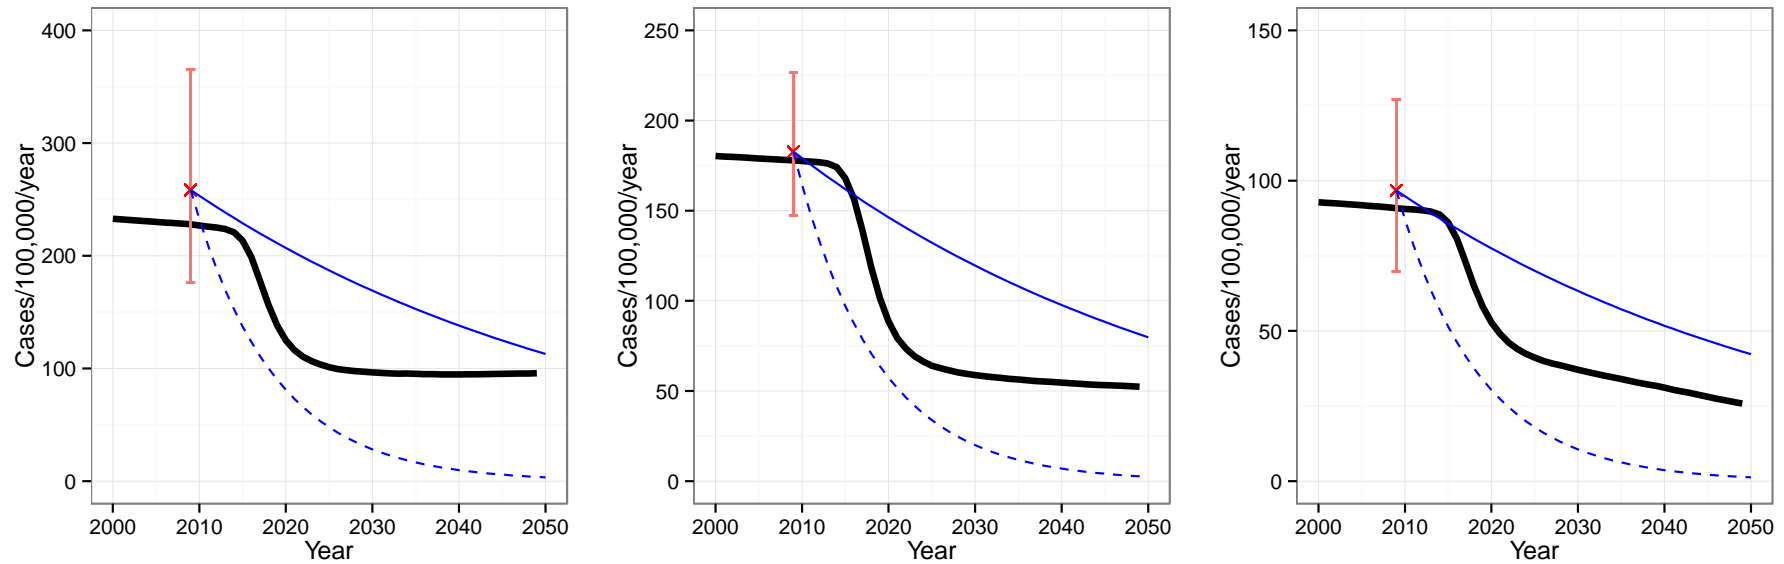

108

109 **Figure S1: Comparison of model prediction of TB incidence for LICs, LMICs and UMICs with assumed scale-up in TB control versus current (2%)**  
 110 **decline and best historically observed levels (10%).** Thick black line shows median fit to data (red cross and interval) for LICs, LMICs and UMICs (left to  
 111 right). The decline in median levels reflects the assumed scale-up in TB control in order to be conservative in vaccine impact. The blue solid line is the 2%  
 112 decline in TB incidence per year, the dashed is the 10% decline, which has been observed historically (in Europe, with the use of chemotherapy). Over 2009-  
 113 2050 a 2% decline per year would result in TB incidence in LIC, LMIC and UMIC respectively of 113, 80 and 42 cases per 100,000 population in 2050.

114

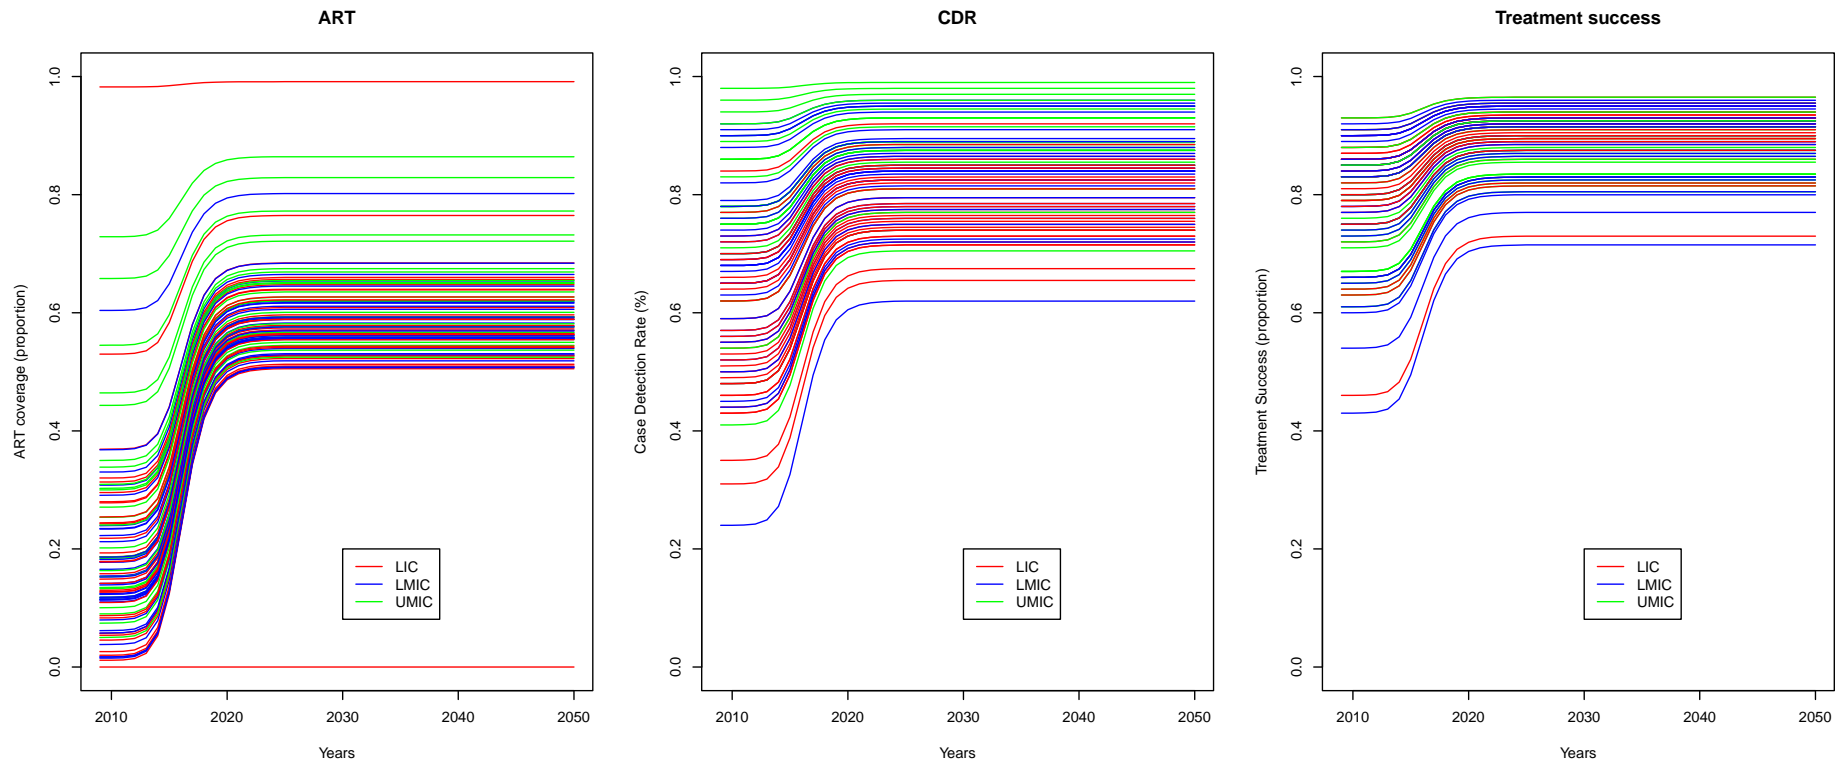

115  
 116  
 117  
 118  
 119  
 120  
 121

**Figure S2: Future assumptions about ART, Case Detection Rate (CDR) and Treatment Success.** Each line is the estimate from a different country, with colours reflecting income groups and the assumed scale-up in TB control by 2020 shown (halving of the difference between 2009 value and 100% detection, success or coverage respectively). The bottom red line (no ART coverage) is the estimate for Afghanistan where there is assumed to be negligible HIV prevalence.

122 ***Vaccine profiles***

123 It is assumed that the vaccine prevents active disease but not infection. Hence, it has equal efficacy in  
124 TB uninfected or infected individuals. The new vaccine was assumed introduced in 2024 and two  
125 doses of the vaccine are required to obtain the assumed efficacy values. Coverage here is then taken to  
126 be those who receive both doses, i.e. although we assume that two doses would be needed in the  
127 costing we do not explicitly model two separate doses. For example, if school attendance were 80%,  
128 then 80% of school children would be assumed to receive two doses in this model.

129 ***Vaccine coverage assumptions***

130 For the ‘infant’ strategy the first dose would be given at birth and the second with the third  
131 dose of diphtheria-tetanus-pertussis (DTP) vaccine around 14 weeks. Coverage was assumed similar  
132 to WHO/Unicef 2011 coverage estimates of the third dose of diphtheria-tetanus-pertussis (DTP3)  
133 vaccine (Table S3). The ‘Adolescent/Adult’ vaccine was targeted to 10 year olds at schools and  
134 coverage rates were based on school attendance levels in each country obtained from UNICEF (Table  
135 S3). There would be six months between the first and second dose. For the profiles with less than  
136 lifelong duration of protection, this vaccine was also assumed delivered in mass campaigns in 2024  
137 and then with a frequency equal to every 10 years or the length of duration of protection, which ever  
138 was longer, targeting all of the population above 11 years. Coverage of mass campaigns was 20%  
139 lower than those obtained in rubella campaigns targeting women of childbearing age (Table S3).

140 To our knowledge, there are no examples of mass vaccination campaigns targeting the whole  
141 population above a certain age, as modelled in this analysis. The largest vaccination campaigns  
142 conducted previously have been against rubella for all women of childbearing age and against  
143 meningococcal A for all people between 1 and 29 years in the African Meningitis Belt (11-13). While  
144 campaigns targeting an even wider age group would require substantial social mobilisation and pose  
145 logistical challenges, they are considered the only viable option for adult TB vaccine delivery in  
146 LMICs with weak health systems (14). To enable such mass campaigns to be operationally feasible,  
147 substantial TB vaccine research is focused on aerosolized vaccines that can be delivered by non health  
148 care workers and temperature stable vaccines that do not require a cold chain (15). We based our mass  
149 campaign vaccination coverage assumptions on those obtained for rubella campaigns, but since the  
150 modelled TB vaccination campaigns would target a wider age group we assumed 20% less coverage  
151 (11). Coverage rates of rubella vaccine campaigns were available for 126 countries in the WHO  
152 database (16). However, the target age groups varied considerably with some targeting women up to  
153 45 years and others only girls between 9 months and 14 years. Mean reported coverage across the  
154 countries was 93%, with a variation of 25% in Bahamas and 116% in Nicaragua (both of these  
155 campaigns targeted girls and women up to 40 years). For our study countries, we used the average of  
156 the reported campaign coverage rates from the respective WHO regions. We thus assumed a 72%  
157 mass vaccination coverage in the Eastern Mediterranean and European regions, 73% in South East  
158 Asia and the Western Pacific, 75% in Africa and 76% in the Americas.

159 BCG vaccination was not modelled explicitly, but was assumed to continue at current levels  
160 in both settings due to the known benefits (1).

161

162

163 ***Transmission model***

164 The model structure is outline in Figure 3. The basic TB natural history framework is shown in Figure  
165 3a, whilst Figure 3b shows the vaccinated and HIV stratification layers.

166 ***- TB natural history***

167 Susceptibles are infected at a rate  $\lambda = \eta z Prev$  where  $\eta$  is the number of respiratory contacts a year,  $z$   
168 the probability of transmission per effective contact rate (0.1) and  $Prev$  is the prevalence of Infectious  
169 TB cases (Figure S3). A proportion  $p$  develop active TB, and a proportion of these are infectious ( $f$ ) or

170 non-infectious  $(1 - f)$ , while  $(1 - p)$  become latently infected. Latents are assumed to progress to active  
 171 TB via reactivation at a rate  $v$  or via re-infection at a rate  $\lambda p x$ , where  $x$  is the protection provided by  
 172 latent infection. Of these proportions  $f$  and  $(1 - f)$  become infectious or non-infectious, respectively.  
 173 Infectious and non-infectious cases have TB mortality rates  $u_i$  and  $u_{ni}$ , respectively, which are higher  
 174 than the background mortality rate  $u$ . Non-infectious cases convert to infectious at a rate  $w$ .

175 A proportion  $CDR$  of new infectious active TB cases are detected and started on treatment.  
 176 This proportion is a factor  $e$  lower for non-infectious cases. A proportion  $CoT$  complete treatment and  
 177 move to a Recovered class. Active TB cases can also naturally cure at a rate  $n$ . Recovered individuals  
 178 are assumed to progress to active TB via relapse at a rate  $r$  or via re-infection at a rate  $\lambda p x$ , where  $x$  is  
 179 the protection provided by previous infection. Of these  $f$  and  $(1 - f)$  become infectious or non-  
 180 infectious, respectively. Of those who relapse, a proportion  $f$  becomes infectious.

181 Multi-drug resistant TB was not included explicitly. Instead the prevalence in each country  
 182 was used to add an additional number of MDR-TB treatments to the number of standard TB  
 183 treatments.

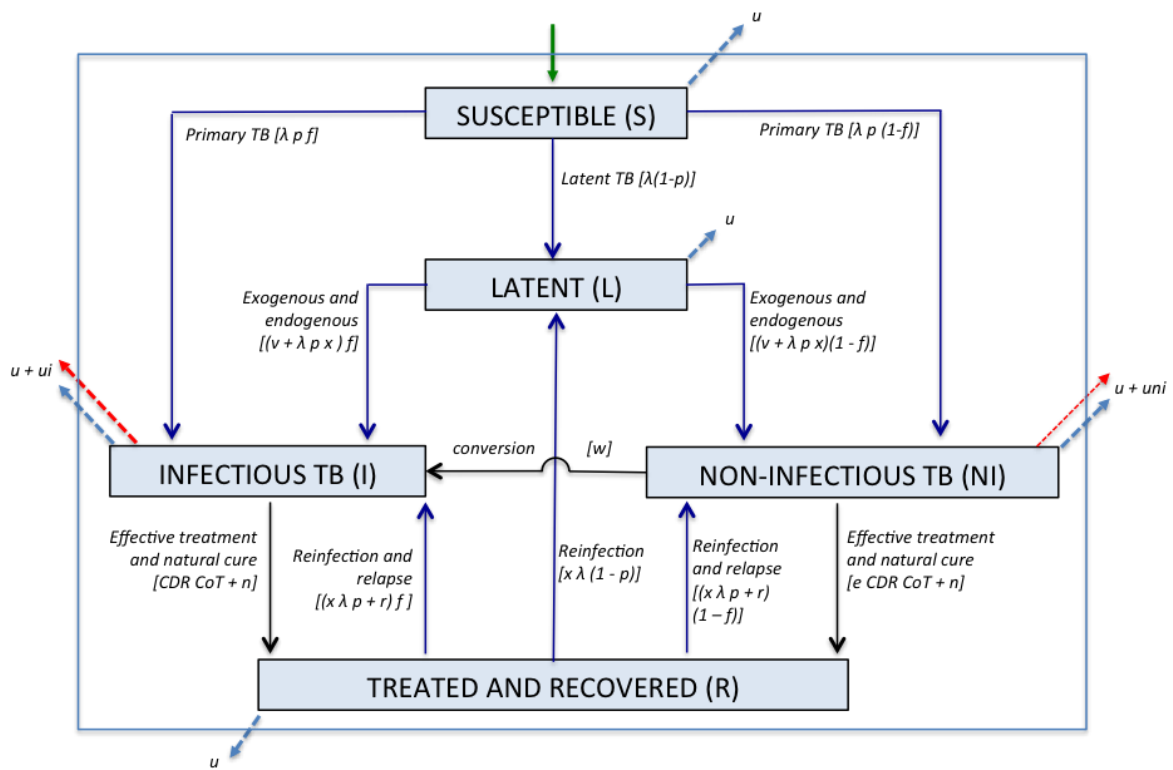

184

185 **Figure S3a: Model outline with parameters as described in Table S1.**

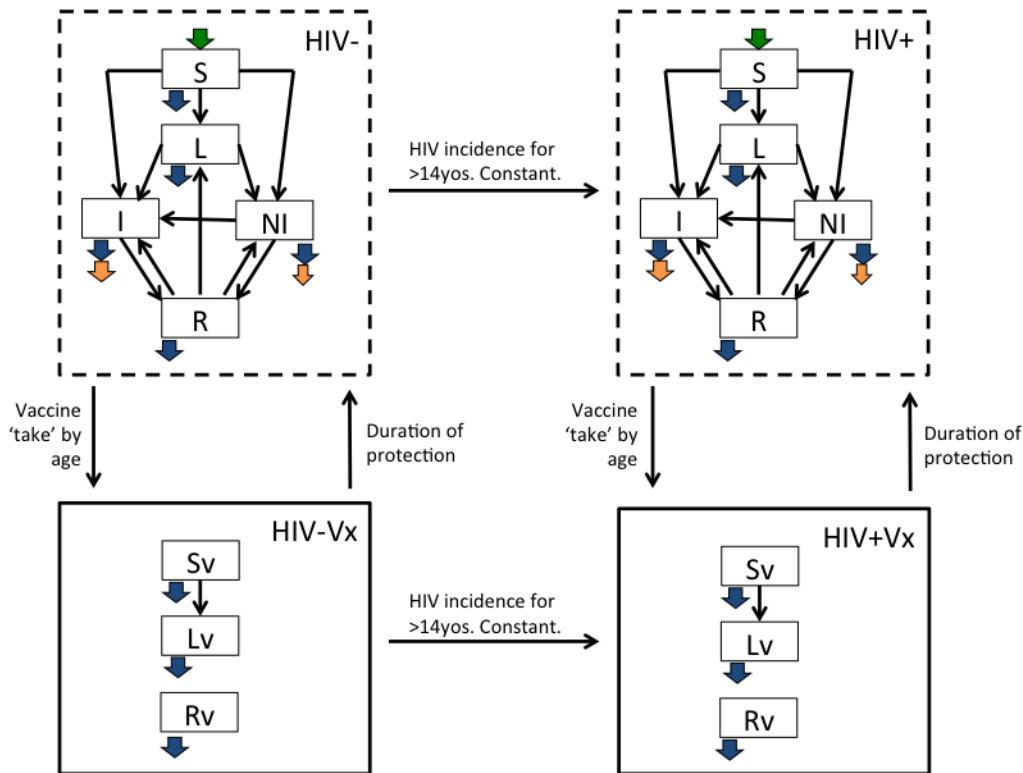

186

187 **Figure S3b: Model outline with vaccinated and HIV-infected subpopulations.** States are labelled  
 188 with abbreviated versions of those in Figure S3a where S, L, I, NI and R represent susceptible, latent,  
 189 infectious, non-infectious and recovered respectively. Shaded blue arrows represent mortality, shaded  
 190 yellow arrows represent TB related mortality and black thin arrows represent transitions between  
 191 states with descriptions provided as to what governs the transitions.

192

193 **- Age stratification**

194 Age is stratified into single years with three age-dependent parameters; the proportion of infections  
 195 that develop active TB ( $p$ ), the proportion of active TB cases that are infectious ( $f$ ) and the  
 196 background mortality rate ( $u$ ). The first two are assumed to be lower for children (<15yos) than for  
 197 adults (Table S1). Age structure is not a calibration target but instead an initial country level input.  
 198 The method of Schenzle was used to capture aging (17) (see Model equations).

199 **- HIV**

200 HIV status is included as a separate stratum (HIV infected or not). HIV specific TB natural history  
 201 rates were taken from the literature (Table S1). We assume that only those older than 15 years can  
 202 become infected with HIV. Here HIV positive individuals are those with late stage HIV infection (low  
 203 CD4 counts, HIV infection stages 3&4 (AIDS)) as has been assumed in previous models (18). This  
 204 was based on the much higher risk of TB in late stage HIV (19). Under this assumption, instead of  
 205 averaging over the changing TB disease risk over the whole of HIV infection, we assume that all HIV  
 206 TB incident cases occur in the late stages. As such, we assumed an average life expectancy of 5 years  
 207 in this late HIV stage without ART (independent of age of acquisition) (20), and an increase from 5 to  
 208 10 years with ART (21, 22).

209 Those members of the population with HIV have different rates of developing active TB ( $p_H$ ,  
 210  $v_H$ ,  $x_H$ ,  $r_H$ ), different proportions of active cases progressing to infectious disease ( $f_H$ ) and different  
 211 mortality rates ( $u_{HA}$ ,  $u_{iHA}$  and  $u_{niHA}$ ). (21, 22)Based on evidence from hepatitis B vaccine studies,



212 vaccine efficacy is decreased by 40% (10-70%) for those who are HIV positive and ART naïve ( $ef_H$ )  
 213 based on evidence from comparative efficacy of hepatitis B vaccines in PLHIV (23, 24) and  
 214 decreased by 20% (0-60%) for those who are on ART ( $ef_A$ ).

215 ART coverage ( $art$ ) for each country is included as a weighted average. It is assumed to affect  
 216 both the HIV mortality rates ( $u_{HA}$ ,  $u_{iH}$ ,  $u_{niHA}$ ) and the progression parameters for HIV positives ( $p_H$ ,  $v_H$ ,  
 217  $x_H$ ,  $r_H$ ). The additional background mortality for people with HIV is  $u_{HA} = \frac{1}{(1-art)LE_{HIV} + artLE_{ART}}$ .

218 Similarly, within the weighted average for TB specific mortality rates ( $u_{iH}$ ,  $u_{niHA}$ ) the mortality rate if  
 219 HIV positive with active TB disease but on ART is 75% less than those who are ART naïve. The  
 220 progression parameters are reduced by 65% in those with HIV on ART, for example decreasing the  
 221 proportion of (re-)infections becoming active:  $p_{HA} = (1 - art)p_H + art_{impact} \times art \times p_H$ .

## 222 - Vaccination

223 In the model only those that do not have active TB (Susceptibles, Latents and Recovereds) can be  
 224 vaccinated (those with active TB would not be vaccinated but instead treated). Vaccination moves  
 225 people into an ‘Immunised’ category, with associated altered risk of *Mtb*-related events. The  
 226 proportion that moves is dependent on the coverage of the population age  $j$  at time  $i$  and the efficacy  
 227 of the vaccine. The model is thus a representation of vaccine ‘take’ (i.e. all or nothing protection)  
 228 rather than ‘degree’ protection. Hence ‘efficacy’ here means the proportion of those vaccinated in  
 229 whom the vaccine is 100% effective, e.g. 80% efficacy means that in 80% of those vaccinated the  
 230 vaccine gave 100% protection, but in 20% it had no effect. Varying coverage by age allows the model  
 231 to capture both vaccination in standard programmes at certain ages and mass campaigns. Coverage is  
 232 assumed to be of those receiving both doses of the vaccine and used to decide numbers moving into  
 233 the ‘Immunised’ category (Table S3).

234 At exactly the end of the duration of protection, individuals return to the non-immunised  
 235 strata. The vaccine is assumed to have the same efficacy on progress to active disease following  
 236 primary infection, progress to active disease following re-infection of a Latent or Recovered and  
 237 progress to active disease via endogenous reactivation of a Latent or relapse of a Recovered.

238 Efficacy of the vaccine is denoted  $a_I$  and coverage in year  $k$  age  $j$  is denoted  $c_I[k, j]$ .  $\theta[k, j]$  is  
 239 the product of these two values:  $\theta[k, j] = a_I c_I[k, j]$ . The proportion of the Susceptible, Recovered  
 240 and Latent population,  $\theta[k, j]$ , that move into the Immunised category are then only those in whom  
 241 the vaccine is completely (100%) efficacious. The vaccine is assumed to prevent active disease but  
 242 not latent infection. Hence, with the same force of infection as in the non-vaccinated population,  
 243 vaccinated Susceptibles and vaccinated Recovereds can become latently infected. However, no  
 244 proportion of these infections progress to active disease during the duration of protection. Due to the  
 245 reduced efficacy of vaccine take in the HIV positive population a smaller proportion is vaccinated:  
 246  $\theta_H[k, j] = ef_{HA} a_I c_I[k, j]$ . Here  $ef_{HA}$  is a weighted average taking into account ART coverage.

247

248

249 **(2) Model calibration**

250 Overview: Model calibration was performed for each country to match population size in 2009 and  
251 2050, and TB incidence and TB mortality in both those with and without HIV in 2009 (the latest time  
252 point with UNAIDS estimates available at the time of writing). Parameter sets were drawn from the  
253 parameter space using random sampling to generate a 1,000 model outputs for each country which lay  
254 within the confidence intervals of the estimates for that country for the above listed indicators. All  
255 analyses were performed at the level of income group but calibration was performed for each country,  
256 so these country level fits were aggregated: the 1,000 fits for each country were added fit by fit to give  
257 1,000 fits for each income group (see “Combining country level outputs for income group results”  
258 section below). Hence, the 1,000 income-group level fits reflect the uncertainty in our input natural  
259 history parameters and the uncertainty intervals in the WHO estimates to which we fit.

260

261 Details:

262 The ‘no new vaccine’ setting was calibrated to 6 outputs for each country: population size in 2009 and  
263 2050 (UN Population Division 2010 revision), TB incidence in HIV negatives, TB incidence in HIV  
264 positives, TB mortality in HIV negatives (WHO, 2011) and TB mortality in HIV positives (calculated  
265 using WHO methodology). Two stages were required for some countries, due to the narrow  
266 confidence intervals in the estimates: the first was the basic parameter search (stages 1-5 below), the  
267 second used Markov Chain Monte Carlo to more efficiently explore the parameter space (6) if 1,000  
268 fits had not been found after sampling at least 400,000 parameter sets. The results are shown for LIC  
269 (Fig. 2) and LMIC&UMIC (Fig. S4).

270 Birth and mortality rate from 2009 were taken as stable from 1900-2009 (to allow the  
271 epidemic to stabilise by 2009). The age structure from 2009 was used to initialise the population in  
272 1900 (UN Population Division 2010 revision). It is assumed that TB is endemic in all countries by  
273 2009. To reflect the uncertainty in natural history parameters, 25 parameters were varied between runs  
274 but remained constant over time. These were 21 natural history parameters and four calibration  
275 factors (Table S1). The calibration factors have no specific biological definition and were used to help  
276 calibrate the model to the estimates of TB burden in 2009 and population size in 2050. They were  
277 values which multiplied parameters estimated directly from data (*CDRscale* and *rmort* for case  
278 detection rate and background mortality respectively) or from the literature ( $\alpha$  and *rmortTB* for the  
279 HIV specific progression parameters and TB associated mortality).

280 The calibration method proceeds as an Approximate Bayesian Computation algorithm (25) as follows

- 281 1) 400,000 parameter sets consisting of 21 natural history parameters and four calibration factors  
282 were generated using Sobol sequences. These 25 parameters were kept constant over time but  
283 varied by fit. These sequences generate a quasi-random, well-distributed set of samples of the  
284 entire parameter space. The “randtoolbox” package in the statistical programme *R* (2) was used.  
285 2) A model output was generated using as inputs one of the parameter sets generated above and an  
286 initial 1900 population size of 20,000. From each solution, the initial population size in 1900  
287 needed to match the correct 2009 population size could then be calculated using:

288 
$$\text{Pop}^n \text{ size in 1900}$$

289 
$$= 20,000 \times (\text{Required pop}^n \text{ size in 2009}) / (\text{Outputted pop}^n \text{ size in 2009})$$

- 290 3) Using this corrected initial population size in 1900, a new model output was generated using the  
291 same parameter set. The outputs of TB incidence and mortality stratified by HIV status in 2009  
292 and the population size at 2050 were then compared against the estimates from the WHO. Only  
293 three parameters vary over time to reflect improved TB control and were inputs: ART coverage,  
294 case detection rate and treatment success proportions. These changes in TB control were the  
295 same for each fit.

- 296 4) The model outputs generated from this set of parameters were assessed via a “rejection method”:  
297 outputs were only deemed “to fit” when the outputs for all five indicators fell within the 95%  
298 confidence intervals of the estimates from the WHO and UN (disease indicators at 2009 and  
299 population size in 2050) and were never negative.
- 300 5) Steps 2-4 were repeated until either 1000 runs that fit had been found or at least 400,000 samples  
301 had been investigated.
- 302 6) If 1000 matching runs (fits) had not been found at this point, a different parameter space  
303 exploration was employed: Markov chain Monte Carlo (MCMC). This allows for the parameter  
304 space to be searched efficiently without the need for the calculation of a likelihood. The  
305 *EasyABC* package in R was modified in order to allow for the summary statistic to be a simple  
306 rejection algorithm – did the model output fall within the data estimate limits or not? The fits  
307 discovered via the Sobol sequencing were used as the initial parameter sets for the MCMC walk  
308 within the ABC algorithm. This was performed until 1,000 fits had been generated.

309 The figures in the main paper show the median value at each time step for the fitted model outputs,  
310 with the 95% range shown in the grey bands. For the income groupings, the median line is the sum of  
311 the median fit from each of the member countries, with the 95% range shown in grey bands.

312 The vaccine interventions were implemented in each country using the model with fitting  
313 natural history and calibration factors. Again the median value at each time point from these  
314 intervention simulations and the 95% range are presented.

315 The prior and posterior distributions are shown in Figure S5 for all countries. There is some  
316 difference in the fitted parameters between prior and posterior as would be expected. That many  
317 posteriors remain uniform reflects that we are, in effect, assuming a step function of a uniform  
318 distribution over the confidence intervals from the data and zero outside.

319

### 320 **(3) Combining country level outputs for income group results**

321 All results are presented at the income group level. To do this the following steps were used:

322

- 323 1. The 1,000 fits for each country were generated using the calibration method above.
- 324 2. All vaccine interventions were implemented in each country separately for all 1,000 fits.  
325 From this, for each country, there were 1,000 sets of basic outputs (e.g. total TB cases, total  
326 costs, total DALYs) for the baseline (‘BCG only’) and each vaccine intervention.
- 327 3. These 1,000 outputs for each country were used to calculate the impact of each vaccine  
328 intervention at the country level (e.g. TB cases averted, Net costs, DALYs averted).
- 329 4. These 1,000 outputs were combined to give vaccine impact in each income group (e.g. all of  
330 the outputs for the first fits for each country were combined to give the outputs for the first fit  
331 for the income group). At this time the cost-effectiveness measures were calculated (e.g. cost  
332 per DALY averted) and compared against the mean GNI of the income group to calculate  
333 cost-effectiveness. The cost-effective vaccine price was calculated using the mean GNI for  
334 the income group and the 1,000 income group outputs.
- 335 5. The median of these impacts and the 95% range from the 1,000 aggregated fits at the income  
336 group level were generated.

337

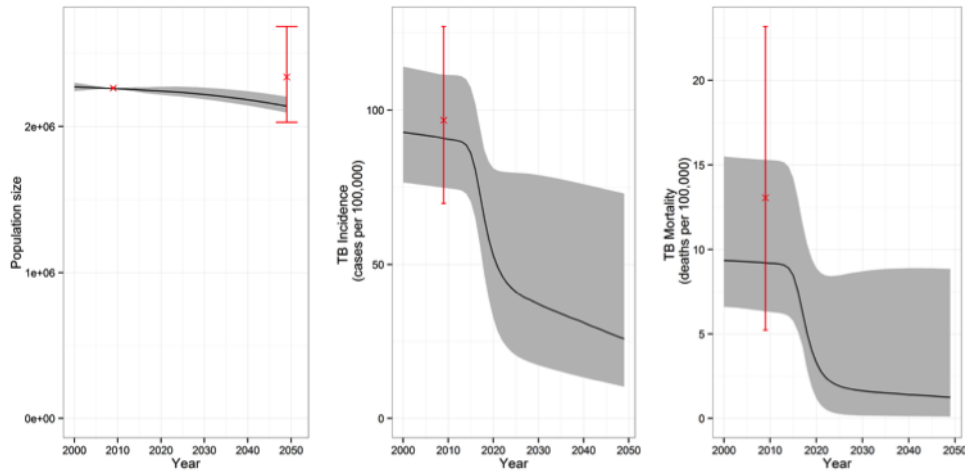

338

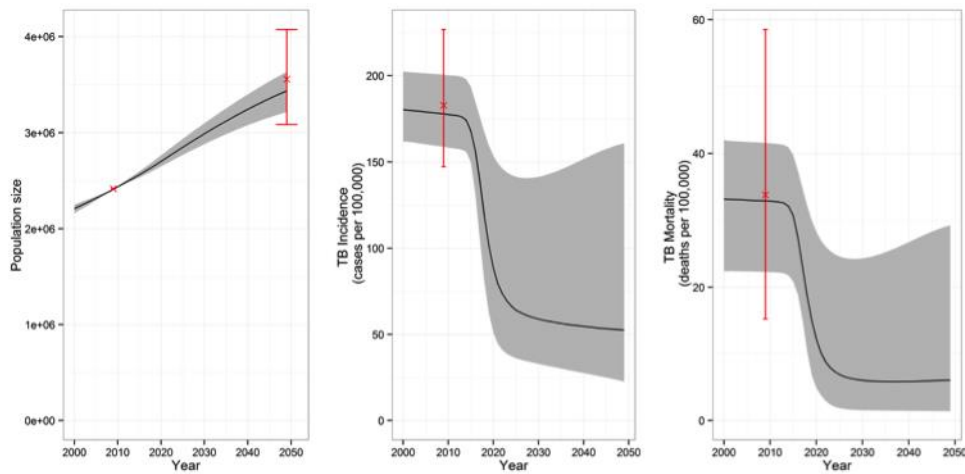

339

340 **Figure S4: Model calibration for lower-middle- (top) and upper-middle- (bottom) income**  
341 **countries.** The median (solid black line) and 95% range (grey cloud) of model fits to UN estimates on  
342 population size (/1000) and WHO estimates on total TB incidence and mortality (red, cross and  
343 range).

344

345

346

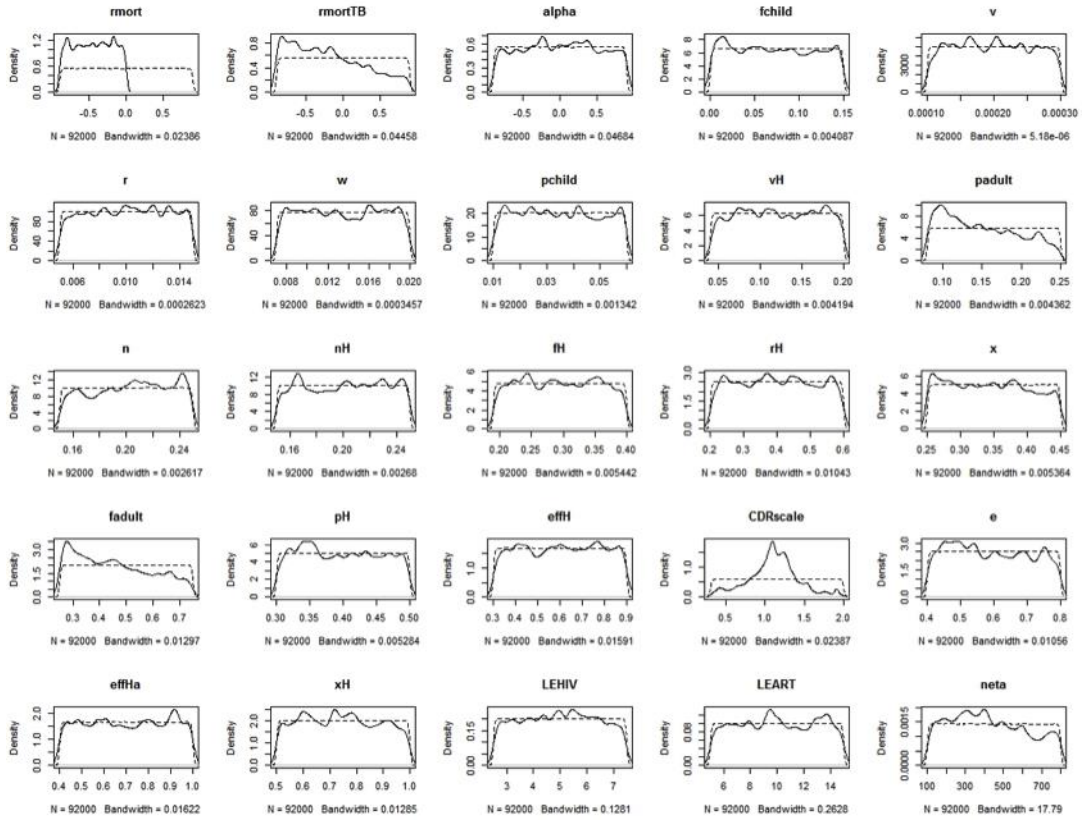

347  
 348  
 349  
 350  
 351  
 352  
 353  
 354  
 355  
 356

**Figure S5: Plot of priors (dashed lines) and posterior (full lines) for all parameters across all three income groups.** Few priors are distinct from their posterior, apart from “rmort” (a scaling of mortality rates) and “CDRscale” (a scaling for case detection ratios). For the former, this parameter was usually negative, suggesting that we had to decrease the background mortality rate. For the latter we found that the estimated CDR from the WHO was usually only a slight underestimate of that in our fits (highly peaked posterior just above 1).

357 **(4) Model equations**

358 The equations for the five *Mtb* sub-populations in year  $k$ , time step  $i$  and age  $j$  are shown below. The  
 359 size of the time step is  $dt$ . Thus  $i = 1$  is the initial time and here  $i = \frac{k-(\text{year of start})}{dt} + 1$ . The method  
 360 of Schenzle (1984) is used to model ageing – at the end of each year all members of the population  
 361 age by one year. New-borns (births) enter the population as Susceptibles at the start of each year.

362 The following equations are valid for all time steps except that at the start of the year.  
 363 Equations for the first time step of the year are given in the Aging section below. Firstly, the  
 364 equations without vaccine use are given in order to outline the interplay between TB and HIV  
 365 (Section 1.). Following this the full set of equations for the HIV negative, HIV positive, Vaccinated  
 366 HIV negative and Vaccinated HIV positive subsets are given (Section 2.). The time step used was 6  
 367 months.

368 **1. Without Vaccine**

369 *Transmission*

370 
$$\lambda[i] = \eta z \left( \frac{I[i] + I_H[i]}{T[i]} \right)$$

371 where  $T[i] = \sum_{j=1}^{j=nage} \left[ \begin{array}{l} S[i, j] + L[i, j] + I[i, j] + NI[i, j] + R[i, j] \\ + S_H[i, j] + L_H[i, j] + I_H[i, j] + NI_H[i, j] + R_H[i, j] \end{array} \right]$  and  $nage$  is the number  
 372 of age classes. Here  $\lambda[i]$  is the force of infection. This was converted, for the discrete time  
 373 formulation, to the cumulative probability which is used in the below formulas.

374 **HIV negative**

375 *TB Susceptibles*

376 
$$S[i, j] = S[i - 1, j] - (u[j] + \lambda[i - 1])S[i - 1, j]dt - hiv[j]S[i - 1, j]dt$$

377  
 378  $hiv[j]$  is zero unless  $j > 14$ .

379 *Latent*

380 
$$L[i, j] = L[i - 1, j] + \lambda[i - 1](1 - p[j])(S[i - 1, j] + xR[i - 1, j])dt$$
  
 381 
$$- (v + \lambda[i - 1]p[j]x + u[j])L[i - 1, j]dt - hiv[j]L[i - 1, j]dt$$

382  
 383 *New infectious active TB cases*

384 
$$new\_I[i, j] = \lambda[i - 1]p[j]f[j](S[i - 1, j] + xR[i - 1, j])dt$$
  
 385 
$$+ (v + \lambda[i - 1]p[j]x)f[j]L[i - 1, j]dt + rf[j]R[i - 1, j]dt + wNI[i - 1, j]dt$$

386  
 387 *New non-infectious active TB cases*

388 
$$new\_NI[i, j] = \lambda[i - 1]p[j](1 - f[j])(S[i - 1, j] + xR[i - 1, j])dt$$
  
 389 
$$+ (v + \lambda[i - 1]p[j]x)(1 - f[j])L[i - 1, j]dt + r(1 - f[j])R[i - 1, j]dt$$

390  
 391 *Infectious active TB cases*

392 
$$I[i, j] = I[i - 1, j] + (1 - CDR[k] \times CoT[k])new\_I[i, j]dt$$
  
 393 
$$- (n + u[j] + u_i)I[i - 1, j]dt - hiv[j]I[i - 1, j]dt$$

394  
 395 *Non-infectious active TB cases*

396 
$$NI[i, j] = NI[i - 1, j] + (1 - eCDR[k] \times CoT[k])new\_NI[i - 1, j]dt$$
  
 397 
$$- (n + u[j] + u_{ni} + w)NI[i - 1, j]dt - hiv[j]NI[i - 1, j]dt$$

398  
 399 *Recovered*

400 
$$R[i, j] = R[i - 1, j] + n(I[i - 1, j] + NI[i - 1, j])dt$$
  
 401 
$$+ CDR[k] \times CoT[k](new\_I[i - 1, j] + e new\_NI[i - 1, j])dt$$

402  $-(r + \lambda[i - 1]x + u[j])R[i - 1, j]dt - hiv[j]R[i - 1, j]dt$   
 403 where  $CDR[k]$  is the case detection rate and  $CoT[k]$  the proportion successfully treated in HIV  
 404 negatives in year  $k$ .

405 **HIV positive**

406 *TB Susceptibles*

407  $S_H[i, j] = S_H[i - 1, j] - (u[j] + u_{HA} + \lambda[i - 1])S_H[i - 1, j]dt + hiv[j]S[i - 1, j]dt$

408 *Latent*

409  $L_H[i, j] = L_H[i - 1, j] + (\lambda[i - 1](1 - p_{HA}[j])(S_H[i - 1, j] + x_H R_H[i - 1, j])dt$   
 410  $-(v_H + \lambda[i - 1]p_{HA}[j]x_H + u[j] + u_{HA})L_H[i - 1, j])dt + hiv[j]L[i - 1, j]dt$

411 *New infectious active TB cases*

412  $new\_I_H[i, j] = \lambda[i - 1]p_{HA}[j]f_{HA}[j](S_H[i - 1, j] + x_H R_H[i - 1, j])dt$

413  $+(v_H + \lambda[i - 1]p_{HA}[j]x_H)f_{HA}[j]L_H[i - 1, j]dt$

414  $+rf_{HA}[j]R_H[i - 1, j]dt + wNI_H[i - 1, j]dt$

415 *New non-infectious active TB cases*

416  $new\_NI_H[i, j] = \lambda[i - 1]p_{HA}[j](1 - f_{HA}[j])(S_H[i - 1, j] + x_H R_H[i - 1, j])dt$

417  $+(v_H + \lambda[i - 1]p_{HA}[j]x_H)(1 - f_{HA}[j])L_H[i - 1, j]dt$

418  $+r(1 - f_{HA}[j])R_H[i - 1, j]dt$

419 *Infectious active TB cases*

420  $I_H[i, j] = I_H[i - 1, j] + (1 - CDR_H[k] \times CoT_H[k])new\_I_H[i, j]dt$

421  $-(n + u[j] + u_{HA} + u_{iHA})I_H[i - 1, j]dt + hiv[j]I[i - 1, j]dt$

422 *Non-infectious active TB cases*

423  $NI_H[i, j] = NI_H[i - 1, j]$

424  $+(1 - eCDR_H[k] \times CoT_H[k])new\_NI_H[i - 1, j]dt$

425  $-(n + u[j] + u_{HA} + u_{niHA} + w)NI_H[i - 1, j]dt + hiv[j]NI[i - 1, j]dt$

426 *Recovered*

427  $R_H[i, j] = R_H[i - 1, j] + n(I_H[i - 1, j] + NI_H[i - 1, j])dt$

428  $+CDR_H[k] \times CoT_H[k](new\_I_H[i - 1, j] + e new\_NI_H[i - 1, j])dt$

429  $-(r + \lambda[i - 1]x_H + u[j] + u_{HA})R_H[i - 1, j]dt + hiv[j]R[i - 1, j]dt$

430

431 **2. With Vaccine**

432 *Transmission*

433 
$$\lambda[i] = \eta z \left( \frac{I[i] + I_H[i]}{T[i]} \right)$$

434 where  $T[i] = \sum_{j=1}^{nage} \left[ \begin{array}{l} S[i, j] + L[i, j] + I[i, j] + NI[i, j] + R[i, j] \\ +S_H[i, j] + L_H[i, j] + I_H[i, j] + NI_H[i, j] + R_H[i, j] \\ +S_V[i, j] + L_V[i, j] + R_V[i, j] \\ +S_{VH}[i, j] + L_{VH}[i, j] + R_{VH}[i, j] \end{array} \right]$  and *nage* is the number

435 of age classes. Here  $\lambda[i]$  is the force of infection. This was converted for the discrete time  
 436 formulation, to the cumulative probability which is used in the below formulas.

437

438 **For time steps not the start of the year**

439 **HIV strata**

440 **HIV negatives**

441 *TB Susceptibles*

442  $S[i, j] = S[i - 1, j] - (u[j] + \lambda[i - 1] + \theta[i, j])S[i - 1, j]dt - hiv[j]S[i - 1, j]dt$

443 where  $\theta[i, j]$  is the coverage of effective vaccine in year  $k$  at time step  $i$  to those aged  $j$ . For time  
 444 steps not at the start of the year, this is only non-zero for the midpoint of the year and for those aged 1  
 445 ( $j = 1$ ).

446 *Latent*

$$447 \quad L[i, j] = L[i - 1, j] + (\lambda[i - 1](1 - p[j])(S[i - 1, j] + xR[i - 1, j])dt$$

$$448 \quad \quad - (v + \lambda[i - 1]p[j]x + u[j])L[i - 1, j])dt$$

$$449 \quad \quad - hiv[j]L[i - 1, j]dt - \theta[i, j]L[i - 1, j]dt$$

450 *New infectious active TB cases*

$$451 \quad new\_I[i, j] = \lambda[i - 1]p[j]f[j](S[i - 1, j] + xR[i - 1, j])dt$$

$$452 \quad \quad + (v + \lambda[i - 1]p[j]x)f[j]L[i - 1, j]dt$$

$$453 \quad \quad + rf[j]R[i - 1, j]dt + wNI[i - 1, j]dt$$

454 *New non-infectious active TB cases*

$$455 \quad new\_NI[i, j] = \lambda[i - 1]p[j](1 - f[j])(S[i - 1, j] + xR[i - 1, j])dt$$

$$456 \quad \quad + (v + \lambda[i - 1]p[j]x)(1 - f[j])L[i - 1, j]dt + r(1 - f[j])R[i - 1, j]dt$$

457 *Infectious active TB cases*

$$458 \quad I[i, j] = I[i - 1, j] + (1 - CDR[k] \times CoT[k])new\_I[i, j]dt$$

$$459 \quad \quad - (n + u[j] + u_i)I[i - 1, j]dt - hiv[j]I[i - 1, j]dt$$

460 *Non-infectious active TB cases*

$$461 \quad NI[i, j] = NI[i - 1, j] + (1 - eCDR[k] \times CoT[k])new\_NI[i - 1, j]dt$$

$$462 \quad \quad - (n + u[j] + u_{ni} + w)NI[i - 1, j]dt - hiv[j]NI[i - 1, j]dt$$

463

464 *Recovered*

$$465 \quad R[i, j] = R[i - 1, j] + n(I[i - 1, j] + NI[i - 1, j])dt$$

$$466 \quad \quad + CDR[k] \times CoT[k](new\_I[i - 1, j] + e new\_NI[i - 1, j])dt$$

$$467 \quad \quad - (r + \lambda[i - 1]x + u[j])R[i - 1, j]dt - hiv[j]R[i - 1, j]dt - \theta[i, j]R[i - 1, j]dt$$

468 **HIV positives**

469 *TB Susceptibles*

$$470 \quad S_H[i, j] = S_H[i - 1, j] - (u[j] + u_{HA} + \lambda[i - 1])S_H[i - 1, j]dt + hiv[j]S[i - 1, j]dt$$

471 The only vaccine applied not at the start of a year is the infant vaccine for those aged 6months. It is  
 472 assumed that only adults(>15yos) can become HIV positive, therefore there is no vaccine coverage  
 473 for HIV positives during the year.

474

475 *Latent*

$$476 \quad L_H[i, j] = L_H[i - 1, j] + (\lambda[i - 1](1 - p_{HA}[j])(S_H[i - 1, j] + x_H R_H[i - 1, j])dt$$

$$477 \quad \quad - (v_H + \lambda[i - 1]p_{HA}[j]x_H + u[j] + u_{HA})L_H[i - 1, j])dt + hiv[j]L[i - 1, j]dt$$

478 *New infectious active TB cases*

$$479 \quad new\_I_H[i, j] = \lambda[i - 1]p_{HA}[j]f_{HA}[j](S_H[i - 1, j] + x_H R_H[i - 1, j])dt$$

$$480 \quad \quad + (v_H + \lambda[i - 1]p_{HA}[j]x_H)f_{HA}[j]L_H[i - 1, j]dt$$

$$481 \quad \quad + rf_{HA}[j]R_H[i - 1, j]dt + wNI_H[i - 1, j]dt$$

482 *New non-infectious active TB cases*

$$483 \quad new_{NI_H}[i, j] = \lambda[i - 1]p_{HA}[j](1 - f_{HA}[j])(S_H[i - 1, j] + x_H R_H[i - 1, j])dt$$

$$484 \quad \quad + (v_H + \lambda[i - 1]p_{HA}[j]x_H)(1 - f_{HA}[j])L_H[i - 1, j]dt$$

$$485 \quad \quad + r(1 - f_{HA}[j])R_H[i - 1, j]dt$$

486 *Infectious active TB cases*

$$487 \quad I_H[i, j] = I_H[i - 1, j] + (1 - CDR_H[k] \times CoT_H[k])new\_I_H[i, j]dt$$

$$488 \quad \quad - (n + u[j] + u_{HA} + u_{iHA})I_H[i - 1, j]dt + hiv[j]I[i - 1, j]dt$$

489 *Non-infectious active TB cases*



$$\begin{aligned}
490 \quad NI_H[i, j] &= NI_H[i - 1, j] + (1 - eCDR_H[k] \times CoT_H[k])new\_NI_H[i - 1, j]dt \\
491 \quad &\quad - (n + u[j] + u_{HA} + u_{niHA} + w)NI_H[i - 1, j]dt + hiv[j]NI[i - 1, j]dt
\end{aligned}$$

492 *Recovered*

$$\begin{aligned}
493 \quad R_H[i, j] &= R_H[i - 1, j] + n(I_H[i - 1, j] + NI_H[i - 1, j])dt \\
494 \quad &\quad + CDR_H[k] \times CoT_H[k](new\_I_H[i - 1, j] + e new\_NI_H[i - 1, j])dt \\
495 \quad &\quad - (r + \lambda[i - 1]x_H + u[j] + u_{HA})R_H[i - 1, j]dt + hiv[j]R[i - 1, j]dt
\end{aligned}$$

496

497

#### 498 **Vaccine strata**

##### 499 **Vaccinated HIV negatives**

500 *TB Susceptibles*

$$\begin{aligned}
501 \quad S_V[i, j] &= S_V[i - 1, j] + \theta[i, j]S[i - 1, j] - \lambda[i - 1]S_V[i - 1, j]dt \\
502 \quad &\quad - u[j]S_V[i - 1, j]dt - d[i, j]S_V[i - 1, j] - hiv[j]S_V[i - 1, j]dt
\end{aligned}$$

503 Here  $d[i, j]$  is the death risk at time step  $i$  and age  $j$ . This is only non-zero for the midpoint of the year  
504 and for those aged half a year plus duration of vaccine protection. The vaccinated terms are not  
505 multiplied by  $dt$  as they only occur at set time steps in the year.

506

507 *Latent*

$$\begin{aligned}
508 \quad L_V[i, j] &= L_V[i - 1, j] + \theta[i, j]L[i - 1, j] + \lambda[i - 1](S_V[i - 1, j] + R_V[i - 1, j])dt \\
509 \quad &\quad - u[j]L_V[i - 1, j]dt - d[i, j]L_V[i - 1, j] - hiv[j]L_V[i - 1, j]dt
\end{aligned}$$

510 *Recovered*

$$\begin{aligned}
511 \quad R_V[i, j] &= R_V[i - 1, j] + \theta[i, j]R[i - 1, j] - \lambda[i - 1]R_V[i - 1, j]dt \\
512 \quad &\quad - u[j]R_V[i - 1, j]dt - d[i, j]R_V[i - 1, j] - hiv[j]R_V[i - 1, j]dt
\end{aligned}$$

513

##### 514 **Vaccinated HIV positives**

515 *TB Susceptibles*

$$\begin{aligned}
516 \quad S_{VH}[i, j] &= S_{VH}[i - 1, j] - \lambda[i - 1]S_{VH}[i - 1, j]dt \\
517 \quad &\quad - (u[j] + u_{HA})S_{VH}[i - 1, j]dt - d[i, j]S_{VH}[i - 1, j] + hiv[j]S_V[i - 1, j]dt
\end{aligned}$$

518 *Latent*

$$\begin{aligned}
519 \quad L_{VH}[i, j] &= L_{VH}[i - 1, j] \\
520 \quad &\quad + \lambda[i - 1](S_{VH}[i - 1, j] + R_{VH}[i - 1, j])dt \\
521 \quad &\quad - (u[j] + u_{HA})L_{VH}[i - 1, j]dt \\
522 \quad &\quad - d[i, j]L_{VH}[i - 1, j] \\
523 \quad &\quad + hiv[j]L_V[i - 1, j]dt
\end{aligned}$$

524 *Recovered*

$$\begin{aligned}
525 \quad R_{VH}[i, j] &= R_{VH}[i - 1, j] - \lambda[i - 1]R_{VH}[i - 1, j]dt \\
526 \quad &\quad - (u[j] + u_{HA})R_{VH}[i - 1, j]dt - d[i, j]R_{VH}[i - 1, j] + hiv[j]R_V[i - 1, j]dt
\end{aligned}$$

527

528

529

530

531

532

533

534

535

536 **Aging**

537 If  $i$  is the first time point of a year  $k$ , then the updated values are functions of those aged one year  
538 younger in the previous time step in the method of Schenzle (Schenzle, 1984).

539 The key equations at the start of the year are those for Susceptibles as the number of births,  
540  $B[k]$ , in year  $k$  are all assumed susceptible and HIV negative. Vaccination of these new borns is  
541 assumed to occur at the same time i.e. only at the start of the year.

542 **HIV negatives**

543 *TB Susceptibles*

$$\begin{aligned} 544 \quad S[i, j] = & S[i - 1, j - 1] - (u[j] + \lambda[i - 1])S[i - 1, j - 1]dt \\ 545 \quad & - \theta[k - 1, j - 1]S[i - 1, j - 1] \\ 546 \quad & + d[k - 1, j - 1](1 - \theta[k - 1, j - 1])S_V[i - 1, j - 1] \\ 547 \quad & - hiv[j - 1]S[i - 1, j - 1]dt \end{aligned}$$

548 **HIV positives**

549 *TB Susceptibles*

$$\begin{aligned} 550 \quad S_H[i, j] = & S_H[i - 1, j - 1] - (u[j - 1] + u_{HA} + \lambda[i - 1])S_H[i - 1, j - 1]dt \\ 551 \quad & - \theta_H[k - 1, j - 1]S_H[i - 1, j - 1] \\ 552 \quad & + d[k - 1, j - 1](1 - \theta_H[k - 1, j - 1])S_{VH}[i - 1, j - 1] \\ 553 \quad & + hiv[j - 1]S[i - 1, j - 1]dt \end{aligned}$$

554

555 **Vaccinated HIV negatives**

556 *TB Susceptibles*

$$\begin{aligned} 557 \quad S_V[i, j - 1] = & S_V[i - 1, j - 1] + \theta[k - 1, j - 1]S[i - 1, j - 1] \\ 558 \quad & - \lambda[i - 1]S_V[i - 1, j - 1]dt - u[j - 1]S_V[i - 1, j - 1]dt \\ 559 \quad & - d[k - 1, j - 1](1 - \theta_H[k - 1, j - 1])S_V[i - 1, j - 1] \\ 560 \quad & - hiv[j - 1]S_V[i - 1, j - 1]dt \end{aligned}$$

561 **Vaccinated HIV positives**

562 *TB Susceptibles*

$$\begin{aligned} 563 \quad S_{VH}[i, j - 1] = & S_{VH}[i - 1, j - 1] + \theta[k - 1, j - 1]\square_H[i - 1, j - 1] \\ 564 \quad & - \lambda[i - 1]S_{VH}[i - 1, j - 1]dt - (u[j - 1] + u_{HA})S_{VH}[i - 1, j - 1]dt \\ 565 \quad & - d[k - 1, j - 1](1 - \theta_H[k - 1, j - 1])S_{VH}[i - 1, j - 1] \\ 566 \quad & + hiv[j - 1]S_V[i - 1, j - 1]dt \end{aligned}$$

567 Further equations for the other sub-populations are as show above, but are dependent not only the last  
568 time step but the lower age. For example, the equation for HIV negative Latents becomes:

569

570 *Latent*

$$\begin{aligned} 571 \quad L[i, j] = & L[i - 1, j - 1] \\ 572 \quad & + (\lambda[i - 1](1 - p[j - 1])(S[i - 1, j - 1] + xR[i - 1, j - 1])dt \\ 573 \quad & - (v + \lambda[i - 1]p[j - 1]x + u[j - 1])L[i - 1, j - 1])dt \\ 574 \quad & - hiv[j - 1]L[i - 1, j - 1]dt \\ 575 \quad & - \theta[k - 1, j - 1]L[i - 1, j - 1] \end{aligned}$$

576

577

578

579 (5) Natural history and vaccine cost parameters

580 **Table S1: Parameter descriptions, additional notes, proposed values and references. The parameters of the model are shown for year  $k$  or time step  $i$**   
 581 **and age  $j$ . All risks are shown per year (unless otherwise stated) and applied per time step ( $dt$ ). Proposed values for parameters used in the sampling**  
 582 **are for illustration purposes only.**

|                     | Symbol          | Description                                                                                                | Notes                                                          | Proposed value (ranges for sensitivity)                                                                    | References                                                              |
|---------------------|-----------------|------------------------------------------------------------------------------------------------------------|----------------------------------------------------------------|------------------------------------------------------------------------------------------------------------|-------------------------------------------------------------------------|
| <b>Births</b>       | $B[k]$          | Number of births in year $k$                                                                               |                                                                | Taken from estimates                                                                                       | UN Population Division (2010 revision) (3)                              |
| <b>Transmission</b> | $\lambda[i]$    | <i>Mtb</i> transmission risk in time step $i$                                                              |                                                                | Calculated per time step                                                                                   |                                                                         |
|                     | $\eta$          | Number of respiratory contacts in a year                                                                   | Varies by country.                                             | Calibrated by country to match TB incidence<br>Range sampled: (200-800)<br>Initial values taken from (26). |                                                                         |
|                     | $z$             | Probability of transmission per respiratory contact between an Infectious and Susceptible                  |                                                                | 0.1                                                                                                        | (26)                                                                    |
| <b>Progression</b>  | $p[j]; p_H[j];$ | Proportion of (re-)infected Susceptible, Latents or Recovereds which develop active TB; For HIV infecteds; | Varies by age (NB those under 15 cannot be HIV positive). (27) | $p[j < 15] = 0.02$ (0.01-0.06);<br>$p[j \geq 15] = 0.15$ (0.08 – 0.25)                                     | Child level calibrated to percentage of TB in children. (18, 26, 28-35) |
|                     |                 |                                                                                                            |                                                                | $p_H[j < 15] = 0;$<br>$p_H[j \geq 15] = 0.405$ (0.3-0.5)                                                   |                                                                         |
|                     | $p_{HA}[j]$     | Proportion (re-)infected which develop active TB                                                           | Weighted average to include ART coverage. ART decreases the    |                                                                                                            | $p_{HA} = (1 - art)p_H + art_{impact}(art)p_H$                          |

|                      |                     |                                                                                            |                                                                                            |                                                                                                                                                                                                                                                                                                             |                     |
|----------------------|---------------------|--------------------------------------------------------------------------------------------|--------------------------------------------------------------------------------------------|-------------------------------------------------------------------------------------------------------------------------------------------------------------------------------------------------------------------------------------------------------------------------------------------------------------|---------------------|
|                      |                     | from the PLHIV class                                                                       | proportion progressing to active by 65% (27).                                              |                                                                                                                                                                                                                                                                                                             |                     |
|                      | $\alpha$            | Calibration factor                                                                         |                                                                                            | Calibrated to match TB incidence and mortality in HIV positives.<br>Range sampled: (-1,1)<br>If $\alpha < 0$ : $p_H = \alpha * p_H$ ; $v_H = \alpha * v_H$ ; $r_H = \alpha * r_H$ ;<br>If $\alpha > 0$ : $p_H = \alpha (1 - p_H) + p_H$ ; $v_H = \alpha (1 - v_H) + v_H$ ; $r_H = \alpha (1 - r_H) + r_H$ ; |                     |
|                      | $x$ ;<br>$x_H$ ;    | Protection from developing active TB due to being latently infected;<br>For HIV infecteds; | $(1-x)$ is the value for the level of protection afforded (e.g. here 65% in HIV negatives) | $x = 0.35 (0.25 - 0.45)$                                                                                                                                                                                                                                                                                    | (18, 31-33, 36)     |
|                      |                     |                                                                                            |                                                                                            | $x_H = 1 (0.5 - 1)$ ;                                                                                                                                                                                                                                                                                       | Assumed (no data).  |
|                      | $x_{HA}$            | Protection from developing active TB due to being latently infected for the PLHIV class.   | Weighted average to include ART coverage                                                   | $x_{HA} = (1 - art)x_H + art_{impact}(art)x_H$                                                                                                                                                                                                                                                              |                     |
|                      | $v$ ;<br>$v_H$ ;    | Risk of reactivation among latent infections;<br>For HIV infecteds;                        |                                                                                            | $v = 1.13 \times 10^{-4} (1-3 \times 10^{-4})$                                                                                                                                                                                                                                                              | (18, 31, 33, 37-39) |
|                      |                     |                                                                                            |                                                                                            | $v_H = 0.17 (0.04 - 0.2)$ ;                                                                                                                                                                                                                                                                                 |                     |
|                      | $v_{HA}$            | Risk of reactivation among latent infections for the PLHIV class                           | Weighted average to include ART coverage                                                   | $v_{HA} = (1 - art)v_H + art_{impact}(art)v_H$                                                                                                                                                                                                                                                              |                     |
| <b>Infectious TB</b> | $f[j]$ ; $f_H[j]$ ; | Proportion of new active cases which                                                       | Varies by age.<br><br>(NB those younger than                                               | $f[j < 15] = 0.1(0-0.15)$ ;<br>$f[j \geq 15] = 0.5 (0.25-0.75)$ ;                                                                                                                                                                                                                                           | (18, 30, 36, 40)    |

|                                                                                      |                    |                                                                         |                                                      |                                                                                                                                                           |                                                       |
|--------------------------------------------------------------------------------------|--------------------|-------------------------------------------------------------------------|------------------------------------------------------|-----------------------------------------------------------------------------------------------------------------------------------------------------------|-------------------------------------------------------|
|                                                                                      |                    | directly become infectious;<br>For HIV infecteds;<br>With ART coverage. | 15 cannot get HIV)                                   | $f_H[j < 15] = 0;$<br>$f_H[j \geq 15] = 0.3 (0.19 - 0.4);$                                                                                                | (41-48)                                               |
|                                                                                      | $w$                | Non-infectious to infectious TB risk                                    |                                                      | 0.015 (0.007 – 0.02)                                                                                                                                      | (18, 29)                                              |
| <b>Mortality</b>                                                                     | $u[j];$            | Background death risk at age $j$                                        | Varies by age.                                       | Varies by country                                                                                                                                         | Taken from UN Population Division (2010 revision) (3) |
|                                                                                      | $u_{HA}$           | Additional background death risk for HIV infecteds                      |                                                      | $u_{HA} = [(1-art)LE_{HIV} + artLE_{ART}]^{-1}$                                                                                                           |                                                       |
|                                                                                      | $rmort$            | Calibration factor                                                      |                                                      | Calibrated to match population size in 2050.<br>Range sampled: (-1,1)<br>If ( $rmort < 0$ ): $u=(1+rmort) u$<br>If ( $rmort \geq 0$ ): $u=(1-u)rmort + u$ |                                                       |
|                                                                                      | $u_i; u_{iHA}$     | Death risk for infectious untreated TB; For HIV infecteds               | ART is assumed to reduce active TB mortality by 75%. | Calibrated to match TB mortality via $rmortTB$ (initially $u_i = 0.6, u_{iH} = 0.9$ )                                                                     | (49)                                                  |
|                                                                                      |                    |                                                                         |                                                      | Calibrated to match TB mortality via $rmortTB$ . (initially $u_{iHA} = (1-art) 0.9 + art*(0.25)*0.9$ )                                                    | (50, 51)                                              |
|                                                                                      | $u_{ni}; u_{niHA}$ | Death risk for non-infectious untreated TB; For HIV infecteds           |                                                      | Calibrated to match TB mortality via $rmortTB$ . (Initially $u_{ni} = 0.21, u_{niH} = 0.3$ )                                                              | (18, 26, 52, 53)                                      |
| Calibrated to match TB mortality via $rmortTB$ . (Initially $u_{niHA} = 1-art$ ) 0.3 |                    |                                                                         |                                                      | (54-60)                                                                                                                                                   |                                                       |

|                                 |                    |                                                                                                                          |                                          |                                                                                                                                                                                                                        |      |
|---------------------------------|--------------------|--------------------------------------------------------------------------------------------------------------------------|------------------------------------------|------------------------------------------------------------------------------------------------------------------------------------------------------------------------------------------------------------------------|------|
|                                 |                    |                                                                                                                          |                                          | + art*(0.25)*0.3)                                                                                                                                                                                                      |      |
|                                 | $rmortTB$          | Calibration factor                                                                                                       |                                          | Calibrated to match TB mortality.<br>Range sampled: (-1,1)<br>$f(rmortTB < 0): u_i=(1+rmortTB)u_i, u_{ni}=(1+rmortTB)u_{ni}$<br>If ( $rmortTB \geq 0$ ): $u_i=(1-u_i)rmortTB + u_i, u_{ni}=(1-u_{ni})rmortTB + u_{ni}$ |      |
| <b>Natural cure and relapse</b> | $n; n_H$           | Annual risk of natural cure for TB cases; For HIV infecteds                                                              |                                          | 0.2 (0.15 – 0.25)                                                                                                                                                                                                      | (18) |
|                                 | $r; r_H;$          | Annual risk of relapse from Recovereds to active TB; For HIV infecteds                                                   |                                          | $r = 0.01$ (0.005-0.015);<br>$r_H = 0.4$ (0.2-0.6);                                                                                                                                                                    | (61) |
|                                 | $r_{HA}$           | Annual risk of relapse for PLHIV class.                                                                                  | Weighted average to include ART coverage | $r_{HA}=(1 - art)r_H + art_{impact}(art)r_H$                                                                                                                                                                           |      |
| <b>Treatment</b>                | $CDR[k]; CDR_H[k]$ | Proportion of new active TB cases detected and started on treatment in year $k$ ; For HIV infecteds                      |                                          | Varies by country and over time.                                                                                                                                                                                       | (4)  |
|                                 | $CDRscale$         | Calibration factor                                                                                                       |                                          | Calibrated to match TB incidence and mortality.<br>Range sampled: (0.5, 2)<br>$CDR=CDRscale*CDR; CDR_H=CDRscale*CDR_H$                                                                                                 |      |
|                                 | $CoT[k]; CoT_H[k]$ | Proportion of treated cases which are successfully treated (cured or complete treatment) in year $k$ ; For HIV infecteds |                                          | Varies by country, HIV status and over time.                                                                                                                                                                           | (4)  |

|                |                       |                                                                                                                              |                                                                                                   |                                                                                      |                                                                                                                          |
|----------------|-----------------------|------------------------------------------------------------------------------------------------------------------------------|---------------------------------------------------------------------------------------------------|--------------------------------------------------------------------------------------|--------------------------------------------------------------------------------------------------------------------------|
|                | $e$                   | Relative case detection rate of non-infectious cases                                                                         |                                                                                                   | 0.6 (0.4 – 0.8)                                                                      | Assumed.                                                                                                                 |
| <b>HIV</b>     | $hiv[j]$              | Proportion of the HIV negative population that become infected with HIV at age $j$                                           | Only those older than 14yos can become infected.                                                  | Taken from data source                                                               | (6)                                                                                                                      |
|                | $art$                 | Proportion of the population receiving ART                                                                                   |                                                                                                   | Country dependent.                                                                   | Taken as the ART coverage in 2009 (6) rising half the difference between this and 100% by 2020 via a sigmoidal function. |
|                | $LE_{HIV}$            | Average duration of HIV infection before death if ART naïve                                                                  | Used to calculate the additional component of background mortality for HIV positives              | 5 (2.5-7.5)                                                                          |                                                                                                                          |
|                | $LE_{ART}$            | Average duration of HIV infection on ART before death                                                                        |                                                                                                   | 10 (5-15)                                                                            | ART halves the additional mortality rate from acquisition of HIV.                                                        |
|                | $art_{impact}$        | Reduction in proportion of (re-)infected Susceptible, Latents or Recovereds which develop active TB for HIV infecteds on ART | Used in several progression parameters ((re-)infection, reactivation, relapse, latent protection) | 0.35                                                                                 | (27)                                                                                                                     |
| <b>Vaccine</b> | $c[k,j];$<br>$c_0[k]$ | Coverage of vaccine to those aged $j$ at year $k$ ;<br>For Newborns                                                          |                                                                                                   | Different coverage levels at different times and for different ages can be included. | To be decided.                                                                                                           |
|                | $a_i$                 | Efficacy in preventing active disease                                                                                        | Vaccine dependent.                                                                                | 50% / 60% / 80%                                                                      | Assumed.                                                                                                                 |

|              |                                 |                                                                                                                                |                    |                                                    |             |             |                                               |
|--------------|---------------------------------|--------------------------------------------------------------------------------------------------------------------------------|--------------------|----------------------------------------------------|-------------|-------------|-----------------------------------------------|
|              | $ef_H; ef_{HA}$                 | Relative lower efficacy of vaccine in those with HIV; On ART                                                                   |                    | $ef_H = 0.6 (0.3-0.9);$<br>$ef_{HA} = 0.8 (0.4-1)$ |             |             | Taken from hepatitis B vaccine data (23, 24). |
|              | $\theta[k,j];$<br>$\theta_H[k]$ | Proportion of Susceptibles, Latents and Recovereds aged $j$ that move to the vaccine strata in year $k$ ;<br>For HIV infecteds |                    | Product of coverage and efficacy.                  |             |             |                                               |
|              | $D$                             | Duration of vaccine efficacy                                                                                                   | Vaccine dependent. | 5yrs / 10yrs / lifetime                            |             |             | Assumed                                       |
| <b>Costs</b> |                                 |                                                                                                                                |                    | <b>LIC</b>                                         | <b>LMIC</b> | <b>UMIC</b> | Assumed                                       |
|              | <i>Vaccine price</i>            | Price per single dose of vaccine                                                                                               | Tiered             | \$ 1.50                                            | \$ 5        | \$ 10       |                                               |
|              | <i>Delivery costs</i>           | With DTP3                                                                                                                      |                    | \$ 0.59                                            | \$ 0.86     | \$ 1.18     | (62-64)                                       |
|              |                                 | In schools                                                                                                                     |                    | \$ 1.30                                            | \$ 1.95     | \$ 2.60     |                                               |
|              |                                 | In mass campaigns                                                                                                              |                    | \$ 0.86                                            | \$ 1.29     | \$ 1.72     |                                               |
|              | <i>Mean GNI</i>                 |                                                                                                                                |                    | \$ 563                                             | \$ 2,250    | \$ 7,149    | (9)                                           |

583

584



585 **(6) Countries excluded from the analysis and why**

586 Several countries were excluded from the analysis for one of two reasons: either a lack of  
 587 sufficient information on the epidemiology or demography for a country (e.g. TB incidence or  
 588 population size) or an inability of our methods to determine a model fit. The latter was  
 589 usually due to these countries having extremely narrow confidence intervals on their TB  
 590 mortality estimates in 2009 or population size in 2050.

591 **Table S2: Excluded countries**

| Income group         | Country*              | Reason for exclusion                                             |
|----------------------|-----------------------|------------------------------------------------------------------|
| <b>Low-</b>          | Comoros               | Lack of sufficient TB incidence estimates from WHO               |
|                      | <i>Korea, DPR</i>     | <i>No fit</i>                                                    |
|                      | <i>Haiti</i>          | <i>No fit</i>                                                    |
| <b>Lower-Middle-</b> | Albania               | Lack of sufficient TB incidence estimates from WHO               |
|                      | Belize                | No notified cases and outcome estimates from WHO                 |
|                      | Cape Verde            | No notified cases and outcome estimates from WHO                 |
|                      | Kiribati              | No population size predictions in 2050 from UN.                  |
|                      | Kosovo                | No birth estimates from UN                                       |
|                      | Marshall Islands      | No population size predictions in 2050 from UN.                  |
|                      | Micronesia, Fed. Sts. | Lack of sufficient TB incidence estimates from WHO               |
|                      | Mongolia              | Lack of sufficient TB incidence estimates by HIV status from WHO |
|                      | Samoa                 | Lack of sufficient TB incidence estimates from WHO               |
|                      | São Tomé & Príncipe   | Lack of sufficient TB incidence estimates by HIV status from WHO |
|                      | Solomon Islands       | Lack of sufficient TB incidence estimates from WHO               |
|                      | South Sudan           | No population estimates from UN                                  |
|                      | Syrian Arab Republic  | Lack of sufficient TB incidence estimates from WHO               |
|                      | Timor-Leste           | No notified cases and outcome estimates from WHO                 |
|                      | Tonga                 | Lack of sufficient TB incidence estimates by HIV status from WHO |
|                      | West Bank & Gaza      | No population estimates from UN                                  |
|                      | <i>Bolivia</i>        | <i>No fit</i>                                                    |
|                      | <i>Cote d'Ivoire</i>  | <i>No fit</i>                                                    |
|                      | <i>Cuba</i>           | <i>No fit</i>                                                    |
|                      | <i>Guatemala</i>      | <i>No fit</i>                                                    |
|                      | <i>Iraq</i>           | <i>No fit</i>                                                    |
|                      | <i>Lao, PDR</i>       | <i>No fit</i>                                                    |
|                      | <i>Moldova</i>        | <i>No fit</i>                                                    |
| <i>Vanuatu</i>       | <i>No fit</i>         |                                                                  |
| <i>Yemen</i>         | <i>No fit</i>         |                                                                  |
| <b>Upper-Middle-</b> | American Samoa        | No population size predictions in 2050 from UN.                  |
|                      | Antigua and Barbuda   | No population size predictions in 2050 from UN.                  |
|                      | Bosnia & Herzegovina  | Lack of sufficient TB incidence estimates from WHO               |
|                      | Dominica              | No population size predictions in 2050 from UN.                  |

|  |                                         |                                                                  |
|--|-----------------------------------------|------------------------------------------------------------------|
|  | Jordan                                  | Lack of sufficient TB incidence estimates by HIV status from WHO |
|  | Libya                                   | No notified cases and outcome estimates from WHO                 |
|  | Macedonia, FYR                          | Lack of sufficient TB incidence estimates from WHO               |
|  | Montenegro                              | Lack of sufficient TB incidence estimates by HIV status from WHO |
|  | Palau                                   | No population size predictions in 2050 from UN.                  |
|  | Seychelles                              | No birth or population size predictions in 2050 from UN.         |
|  | Suriname                                | No notified cases and outcome estimates from WHO                 |
|  | Turkmenistan                            | Lack of sufficient TB incidence estimates from WHO               |
|  | Tuvalu                                  | No population size predictions in 2050 from UN.                  |
|  | <i>Argentina</i>                        | <i>No fit</i>                                                    |
|  | <i>Azerbaijan</i>                       | <i>No fit</i>                                                    |
|  | <i>Costa Rica</i>                       | <i>No fit</i>                                                    |
|  | <i>Grenada</i>                          | <i>No fit</i>                                                    |
|  | <i>Iran</i>                             | <i>No fit</i>                                                    |
|  | <i>Maldives</i>                         | <i>No fit</i>                                                    |
|  | <i>Mauritius</i>                        | <i>No fit</i>                                                    |
|  | <i>St. Lucia</i>                        | <i>No fit</i>                                                    |
|  | <i>St. Vincent &amp; the Grenadines</i> | <i>No fit</i>                                                    |
|  | <i>Venezuela</i>                        | <i>No fit</i>                                                    |

592 \* Countries excluded from the initial low- and middle-income list: 30 due to a lack of  
593 estimates and 21 due to an inability to find a fit (shown in italics).  
594

## 595 (7) Country level parameters

## 596 Table S3: Country level parameter values.

| Country*                       | ART cov.<br>(%) † |      | HIV       | Case<br>detection<br>rate † |      | Treatment<br>success † |      | VACCINE COVERAGE (%) |                                 |               | GNI => Income group |       |       | %<br>MDR        |      |
|--------------------------------|-------------------|------|-----------|-----------------------------|------|------------------------|------|----------------------|---------------------------------|---------------|---------------------|-------|-------|-----------------|------|
|                                | 2009              | 2020 | Incidence | 2009                        | 2020 | 2009                   | 2020 | DTP3<br>(6mos)       | School<br>attendance<br>(10yos) | Mass<br>camp. | 2009                | 2010  | 2011  | Income<br>group |      |
| Afghanistan                    | 0                 | 0    | 0         | 44                          | 72   | 86                     | 93   | 66                   | 44                              | 72            | 370                 | 420   | 470   | LIC             | 3.4  |
| Algeria                        | 7                 | 54   | 0.01      | 70                          | 85   | 91                     | 95   | 95                   | 94                              | 75            | 4470                | 4390  | 4470  | UMIC            | 1.4  |
| Angola                         | 12                | 56   | 0.21      | 75                          | 87   | 43                     | 71   | 86                   | 27                              | 75            | 3590                | 3660  | 3830  | LMIC            | 1.8  |
| *Argentina                     | 42                | 71   | 0.05      | 68                          | 84   | 42                     | 71   | 93                   | 96                              | 71            |                     |       |       | UMIC            | 2.2  |
| Armenia                        | 11                | 56   | 0.01      | 74                          | 87   | 75                     | 87   | 95                   | 91                              | 68            | 3050                | 3200  | 3360  | LMIC            | 9.4  |
| *Azerbaijan                    | 4                 | 52   | 0.01      | 52                          | 76   | 62                     | 81   | 74                   | 64                              | 68            | 4800                | 5380  | 5290  | UMIC            | 22   |
| Bangladesh                     | 19                | 59   | 0.005     | 49                          | 74   | 91                     | 95   | 96                   | 80                              | 69            | 640                 | 700   | 780   | LIC             | 1.4  |
| Belarus                        | 12                | 56   | 0.03      | 78                          | 89   | 73                     | 86   | 98                   | 95                              | 85            | 5590                | 5990  | 5830  | UMIC            | 32   |
| Benin                          | 32                | 66   | 0.1       | 65                          | 82   | 88                     | 94   | 85                   | 63                              | 75            | 770                 | 770   | 780   | LIC             | 0.5  |
| Bhutan                         | 11                | 56   | 0.02      | 72                          | 86   | 91                     | 95   | 95                   | 68                              | 69            | 1820                | 2000  | 2130  | LMIC            | 2.1  |
| *Bolivia                       | 11                | 56   | 0.02      | 65                          | 82   | 84                     | 92   | 82                   | 82                              | 71            | 1640                | 1810  | 2020  | LMIC            | 1.2  |
| Botswana                       | 55                | 77   | 1.56      | 77                          | 88   | 74                     | 87   | 96                   | 86                              | 75            | 6270                | 6750  | 7470  | UMIC            | 2.5  |
| Brazil                         | 73                | 86   | 0.013     | 86                          | 93   | 67                     | 83   | 96                   | 94                              | 71            | 8150                | 9540  | 10720 | UMIC            | 0.91 |
| Bulgaria                       | 9                 | 54   | 0.01      | 86                          | 93   | 85                     | 92   | 95                   | 93                              | 85            | 6080                | 6320  | 6640  | UMIC            | 2    |
| Burkina Faso                   | 30                | 65   | 0.12      | 50                          | 75   | 77                     | 88   | 91                   | 50                              | 75            | 520                 | 560   | 580   | LIC             | 1.8  |
| Burundi                        | 13                | 56   | 0.33      | 59                          | 79   | 86                     | 93   | 96                   | 72                              | 75            | 210                 | 230   | 250   | LIC             | 3.1  |
| Cambodia                       | 98                | 99   | 0.05      | 62                          | 81   | 93                     | 96   | 94                   | 81                              | 73            | 700                 | 760   | 820   | LIC             | 1.4  |
| Cameroon                       | 15                | 58   | 0.53      | 48                          | 74   | 77                     | 88   | 66                   | 76                              | 75            | 1200                | 1190  | 1210  | LMIC            | 3.1  |
| Central<br>African<br>Republic | 15                | 57   | 0.17      | 43                          | 71   | 46                     | 73   | 54                   | 38                              | 75            | 450                 | 470   | 480   | LIC             | 0.44 |
| Chad                           | 19                | 60   | 0.34      | 51                          | 75   | 72                     | 86   | 22                   | 28                              | 75            | 650                 | 710   | 720   | LIC             | 1.8  |
| Chile                          | 35                | 67   | 0.04      | 75                          | 87   | 65                     | 82   | 94                   | 88                              | 71            | 9980                | 10750 | 12280 | UMIC            | 0.69 |

| Country*           | ART coverage (%)<br>† |      | HIV Incidence | Case detection rate† |      | Treatment success† |      | VACCINE COVERAGE (%) |                           |            | GNI => Income group |      |      | % MDR |              |
|--------------------|-----------------------|------|---------------|----------------------|------|--------------------|------|----------------------|---------------------------|------------|---------------------|------|------|-------|--------------|
|                    | 2009                  | 2020 |               | 2009                 | 2020 | 2009               | 2020 | DTP3 (6mos)          | School attendance (10yos) | Mass camp. | 2009                | 2010 | 2011 |       | Income group |
| China              | 19                    | 59   | 0.01          | 90                   | 95   | 93                 | 96   | 99                   | 99                        | 73         | 3620                | 4240 | 4940 | UMIC  | 5.7          |
| Colombia           | 13                    | 57   | 0.05          | 70                   | 85   | 75                 | 87   | 85                   | 85                        | 71         | 5050                | 5480 | 6070 | UMIC  | 1.5          |
| Congo              | 12                    | 56   | 0.28          | 63                   | 81   | 78                 | 89   | 90                   | 58                        | 75         | 90                  | 180  | 190  | LIC   | 3.1          |
| Congo D.R.         | 9                     | 54   | 0.155         | 53                   | 76   | 87                 | 93   | 70                   | 59                        | 75         | 1980                | 2240 | 2250 | LMIC  | 3.1          |
| *Costa Rica        | 40                    | 70   | 0.03          | 62                   | 81   | 57                 | 78   | 85                   | 83                        | 71         | 6200                | 6860 | 7640 | UMIC  | 1.5          |
| *Cote d'Ivoire     | 23                    | 62   | 0.11          | 55                   | 77   | 77                 | 88   | 62                   | 59                        | 75         | 1160                | 1170 | 1090 | LMIC  | 2.5          |
| *Cuba              | 82                    | 91   | 0.01          | 69                   | 84   | 89                 | 94   | 96                   | 97                        | 71         |                     |      |      | LMIC  | 0.96         |
| Djibouti           | 8                     | 54   | 0.25          | 70                   | 85   | 78                 | 89   | 87                   | 62                        | 72         | 1270                |      |      | LMIC  | 1.8          |
| Dominican Republic | 30                    | 65   | 0.09          | 62                   | 81   | 61                 | 80   | 84                   | 83                        | 71         | 4690                | 5030 | 5240 | UMIC  | 6.6          |
| Ecuador            | 18                    | 59   | 0.04          | 48                   | 74   | 71                 | 85   | 99                   | 96                        | 71         | 3630                | 3850 | 4200 | UMIC  | 4.9          |
| Egypt              | 2                     | 51   | 0.005         | 65                   | 82   | 90                 | 95   | 96                   | 94                        | 72         | 2160                | 2420 | 2600 | LMIC  | 3.4          |
| El Salvador        | 33                    | 67   | 0.08          | 92                   | 96   | 90                 | 95   | 89                   | 90                        | 71         | 3310                | 3370 | 3480 | LMIC  | 0.33         |
| Eritrea            | 24                    | 62   | 0.08          | 55                   | 77   | 86                 | 93   | 99                   | 70                        | 94         | 290                 | 340  | 430  | LIC   | 1.8          |
| Ethiopia           | 37                    | 68   | 0.062         | 66                   | 83   | 81                 | 90   | 51                   | 45                        | 75         | 330                 | 360  | 370  | LIC   | 1.6          |
| Fiji               | 11                    | 56   | 0.01          | 56                   | 78   | 83                 | 91   | 99                   | 89                        | 73         | 3890                | 3610 | 3720 | LMIC  | 0            |
| Gabon              | 25                    | 63   | 0.43          | 84                   | 92   | 91                 | 95   | 45                   | 55                        | 75         | 7620                | 7680 | 8080 | UMIC  | 3.1          |
| Gambia             | 6                     | 53   | 0.2           | 41                   | 70   | 64                 | 82   | 96                   | 64                        | 75         | 560                 | 570  | 500  | LIC   | 0.48         |
| Georgia            | 29                    | 65   | 0.01          | 48                   | 74   | 88                 | 94   | 94                   | 85                        | 68         | 2540                | 2680 | 2860 | LMIC  | 11           |
| Ghana              | 14                    | 57   | 0.15          | 82                   | 91   | 74                 | 87   | 91                   | 73                        | 75         | 1190                | 1250 | 1410 | LMIC  | 1.8          |
| *Grenada           | 0                     | 0    | 0             | 68                   | 84   | 83                 | 91   | 94                   | 92                        | 88         | 7090                | 7130 | 7350 | UMIC  | 2.1          |
| *Guatemala         | 20                    | 60   | 0.08          | 120                  | 110  | 60                 | 80   | 85                   | 77                        | 71         | 2660                | 2740 | 2870 | LMIC  | 3            |
| Guinea             | 25                    | 63   | 0.1           | 33                   | 66   | 81                 | 90   | 59                   | 37                        | 75         | 380                 | 390  | 430  | LIC   | 0.56         |
| Guinea-Bissau      | 16                    | 58   | 0.21          | 46                   | 73   | 79                 | 89   | 76                   | 50                        | 75         | 560                 | 570  | 600  | LIC   | 1.8          |
| Guyana             | 60                    | 80   | 0.12          | 64                   | 82   | 66                 | 83   | 93                   | 94                        | 71         | 2640                | 2900 |      | LMIC  | 2.1          |

| Country*           | ART coverage (%)<br>† |      | HIV Incidence | Case detection rate† |      | Treatment success† |      | VACCINE COVERAGE (%) |                           |            | GNI => Income group |      |      | Income group | % MDR |
|--------------------|-----------------------|------|---------------|----------------------|------|--------------------|------|----------------------|---------------------------|------------|---------------------|------|------|--------------|-------|
|                    | 2009                  | 2020 |               | 2009                 | 2020 | 2009               | 2020 | DTP3 (6mos)          | School attendance (10yos) | Mass camp. | 2009                | 2010 | 2011 |              |       |
| <i>*Haiti</i>      | 27                    | 64   | 0.15          | 91                   | 95   | 61                 | 80   | 59                   | 40                        | 71         | 670                 | 650  | 700  | LIC          | 2.1   |
| Honduras           | 23                    | 62   | 0.08          | NA                   | NA   | 77                 | 88   | 98                   | 80                        | 71         | 1780                | 1860 | 1980 | LMIC         | 1.8   |
| India              | 17                    | 58   | 0.03          | 68                   | 84   | 83                 | 91   | 72                   | 66                        | 69         | 1150                | 1270 | 1420 | LMIC         | 2.1   |
| Indonesia          | 6                     | 53   | 0.02          | 59                   | 79   | 86                 | 93   | 63                   | 77                        | 69         | 2160                | 2500 | 2940 | LMIC         | 1.9   |
| <i>*Iran</i>       | 2                     | 51   | 0.02          | 65                   | 82   | 89                 | 94   | 99                   | 93                        | 72         | 4520                |      |      | UMIC         | 5     |
| <i>*Iraq</i>       | 0                     | 0    | 0             | 71                   | 85   | 82                 | 91   | 77                   | 65                        | 72         | 2310                | 2380 | 2640 | LMIC         | 3.4   |
| Jamaica            | 30                    | 65   | 0.13          | 66                   | 83   | 89                 | 94   | 99                   | 96                        | 71         |                     |      |      | UMIC         | 2.1   |
| Kazakhstan         | 12                    | 56   | 0.01          | 93                   | 96   | 84                 | 92   | 99                   | 97                        | 68         | 6780                | 7500 | 8260 | UMIC         | 30    |
| Kenya              | 28                    | 64   | 0.53          | 78                   | 89   | 66                 | 83   | 88                   | 68                        | 75         | 780                 | 810  | 820  | LIC          | 3.1   |
| <i>*Korea, DPR</i> | 0                     | 0    | 0             | 91                   | 95   | 89                 | 94   | 94                   | 64                        | 91         |                     |      |      | LIC          | 2.1   |
| Kyrgyzstan         | 3                     | 51   | 0.03          | 72                   | 86   | 86                 | 93   | 96                   | 91                        | 68         | 860                 | 840  | 900  | LIC          | 26    |
| <i>*Lao, PDR</i>   | 21                    | 60   | 0.02          | 27                   | 63   | 93                 | 96   | 78                   | 64                        | 73         | 900                 | 1010 | 1130 | LMIC         | 4.9   |
| Lebanon            | 15                    | 58   | 0.01          | 92                   | 96   | 85                 | 92   | 81                   | 77                        | 72         | 7850                | 8580 | 9140 | UMIC         | 1.1   |
| Lesotho            | 24                    | 62   | 2.58          | 90                   | 95   | 66                 | 83   | 83                   | 77                        | 75         | 1080                | 1110 | 1210 | LMIC         | 0.91  |
| Liberia            | 11                    | 55   | 0.15          | 54                   | 77   | 86                 | 93   | 49                   | 32                        | 75         | 240                 | 260  | 330  | LIC          | 1.8   |
| Madagascar         | 1                     | 51   | 0.02          | 46                   | 73   | 80                 | 90   | 89                   | 60                        | 75         | 420                 | 430  | 430  | LIC          | 0.49  |
| Malawi             | 28                    | 64   | 0.95          | 65                   | 82   | 85                 | 92   | 97                   | 84                        | 75         | 330                 | 350  | 360  | LIC          | 0.42  |
| Malaysia           | 13                    | 57   | 0.05          | 75                   | 87   | 72                 | 86   | 99                   | 93                        | 73         | 7550                | 8090 | 8770 | UMIC         | 0.1   |
| <i>*Maldives</i>   | 3                     | 52   | 0.005         | 82                   | 91   | 40                 | 70   | 96                   | 94                        | 69         | 5070                | 5440 | 5720 | UMIC         | 2.1   |
| Mali               | 31                    | 66   | 0.1           | 70                   | 85   | 79                 | 89   | 72                   | 42                        | 75         | 560                 | 600  | 610  | LIC          | 1.8   |
| Mauritania         | 12                    | 56   | 0.07          | 24                   | 62   | 60                 | 80   | 75                   | 45                        | 75         | 1030                | 1010 | 1030 | LMIC         | 1.8   |
| <i>*Mauritius</i>  | 9                     | 55   | 0.1           | 41                   | 70   | 88                 | 94   | 98                   | 94                        | 75         | 7260                | 7780 | 8040 | UMIC         | 1     |
| Mexico             | 34                    | 67   | 0.03          | 63                   | 81   | 76                 | 88   | 97                   | 94                        | 71         | 8670                | 8910 | 9420 | UMIC         | 2.4   |
| <i>*Moldova</i>    | 13                    | 56   | 0.04          | 71                   | 85   | 58                 | 79   | 93                   | 79                        | 85         | 1570                | 1820 | 1980 | LMIC         | 19    |

598

| Country*                      | ART coverage (%)<br>† |      | HIV<br>Incidence | Case detection rate† |      | Treatment success† |      | VACCINE COVERAGE (%) |                           |            | GNI => Income group |      |       | Income group | % MDR |
|-------------------------------|-----------------------|------|------------------|----------------------|------|--------------------|------|----------------------|---------------------------|------------|---------------------|------|-------|--------------|-------|
|                               | 2009                  | 2020 |                  | 2009                 | 2020 | 2009               | 2020 | DTP3 (6mos)          | School attendance (10yos) | Mass camp. | 2009                | 2010 | 2011  |              |       |
| Morocco                       | 15                    | 58   | 0.01             | 88                   | 94   | 85                 | 92   | 99                   | 89                        | 72         | 2770                | 2850 | 2970  | LMIC         | 0.48  |
| Mozambique                    | 14                    | 57   | 1.19             | 35                   | 67   | 85                 | 92   | 76                   | 63                        | 75         | 430                 | 440  | 460   | LIC          | 3.5   |
| Myanmar                       | 13                    | 56   | 0.06             | 69                   | 84   | 83                 | 91   | 99                   | 50                        | 69         |                     |      |       | LIC          | 4.2   |
| Namibia                       | 46                    | 73   | 0.43             | 54                   | 77   | 79                 | 89   | 82                   | 79                        | 75         | 3970                | 4180 | 4700  | UMIC         | 3.8   |
| Nepal                         | 5                     | 53   | 0.04             | 73                   | 86   | 90                 | 95   | 92                   | 40                        | 69         | 440                 | 490  | 540   | LIC          | 2.9   |
| Nicaragua                     | 18                    | 59   | 0.02             | 90                   | 95   | 84                 | 92   | 98                   | 81                        | 71         | 1380                | 1410 | 1510  | LMIC         | 0.63  |
| Niger                         | 13                    | 56   | 0.08             | 56                   | 78   | 78                 | 89   | 75                   | 34                        | 75         | 340                 | 360  | 360   | LIC          | 1.8   |
| Nigeria                       | 12                    | 56   | 0.38             | 44                   | 72   | 84                 | 92   | 47                   | 49                        | 75         | 1160                | 1250 | 1280  | LMIC         | 3.1   |
| Pakistan                      | 1                     | 51   | 0.01             | 67                   | 83   | 90                 | 95   | 80                   | 42                        | 72         | 990                 | 1050 | 1120  | LMIC         | 3.4   |
| Panama                        | 27                    | 64   | 0.09             | 94                   | 97   | 75                 | 87   | 87                   | 94                        | 71         | 6570                | 7000 | 7470  | UMIC         | 2.1   |
| Papua New Guinea              | 22                    | 61   | 0.09             | 52                   | 76   | 66                 | 83   | 61                   | 55                        | 73         | 1190                | 1300 | 1480  | LMIC         | 4.9   |
| Paraguay                      | 21                    | 61   | 0.03             | 79                   | 89   | 73                 | 86   | 90                   | 84                        | 71         | 2230                | 2720 | 3020  | LMIC         | 0.31  |
| Peru                          | 24                    | 62   | 0.04             | 98                   | 99   | 80                 | 90   | 91                   | 91                        | 71         | 4190                | 4630 | 5150  | UMIC         | 5.3   |
| Philippines                   | 18                    | 59   | 0.005            | 57                   | 78   | 85                 | 92   | 80                   | 79                        | 73         | 1870                | 2060 | 2210  | LMIC         | 4     |
| Romania                       | 66                    | 83   | 0.01             | 83                   | 91   | 80                 | 90   | 89                   | 89                        | 85         | 8250                | 7950 | 8140  | UMIC         | 2.8   |
| Russia                        | 10                    | 55   | 0.1              | 78                   | 89   | 63                 | 81   | 97                   | 85                        | 68         | 9290                | 9900 | 10650 | UMIC         | 20    |
| Rwanda                        | 53                    | 76   | 0.18             | 62                   | 81   | 79                 | 89   | 97                   | 76                        | 75         | 480                 | 520  | 570   | LIC          | 3.9   |
| *Saint Lucia                  | 0                     | 0    | 0                | 69                   | 84   | 45                 | 72   | 97                   | 91                        | 88         | 6760                | 6680 | 6820  | UMIC         | 2.1   |
| *St. Vincent & the Grenadines | 0                     | 0    | 0                | 34                   | 67   | 0                  | 50   | 95                   | 95                        | 88         | 6260                | 5990 | 6070  | UMIC         | 2.1   |
| Senegal                       | 23                    | 62   | 0.09             | 69                   | 84   | 80                 | 90   | 83                   | 47                        | 75         | 1070                | 1080 | 1070  | LMIC         | 2.1   |
| Serbia                        | 16                    | 58   | 0.01             | 89                   | 94   | 85                 | 92   | 91                   | 93                        | 85         | 5730                | 5630 | 5690  | UMIC         | 0.49  |

599

| Country*          | ART coverage (%)<br>† |      | HIV Incidence | Case detection rate† |      | Treatment success† |      | VACCINE COVERAGE (%) |                           |            | GNI => Income group |       |       | Income group | % MDR |
|-------------------|-----------------------|------|---------------|----------------------|------|--------------------|------|----------------------|---------------------------|------------|---------------------|-------|-------|--------------|-------|
|                   | 2009                  | 2020 |               | 2009                 | 2020 | 2009               | 2020 | DTP3 (6mos)          | School attendance (10yos) | Mass camp. | 2009                | 2010  | 2011  |              |       |
| Serbia            | 16                    | 58   | 0.01          | 89                   | 94   | 85                 | 92   | 91                   | 93                        | 85         | 5730                | 5630  | 5690  | UMIC         | 0.49  |
| Sierra Leone      | 8                     | 54   | 0.14          | 31                   | 65   | 80                 | 90   | 84                   | 67                        | 75         | 430                 | 440   | 460   | LIC          | 0.85  |
| Somalia           | 2                     | 51   | 0.07          | 43                   | 71   | 63                 | 81   | 41                   | 16                        | 72         |                     |       |       | LIC          | 5.2   |
| South Africa      | 20                    | 60   | 1.49          | 75                   | 87   | 67                 | 83   | 72                   | 57                        | 75         | 5730                | 6090  | 6960  | UMIC         | 1.8   |
| Sri Lanka         | 4                     | 52   | 0.005         | 68                   | 84   | 86                 | 93   | 99                   | 87                        | 69         | 1970                | 2260  | 2580  | LMIC         | 0.18  |
| Sudan             | 2                     | 51   | 0.11          | 50                   | 75   | 75                 | 87   | 93                   | 55                        | 72         | 1190                | 1280  | 1310  | LMIC         | 1.8   |
| Swaziland         | 31                    | 65   | 2.66          | 68                   | 84   | 65                 | 82   | 91                   | 80                        | 75         | 3010                | 3050  | 3470  | LMIC         | 7.7   |
| Tajikistan        | 5                     | 52   | 0.02          | 48                   | 74   | 84                 | 92   | 96                   | 92                        | 68         | 750                 | 810   | 870   | LIC          | 13    |
| Tanzania          | 18                    | 59   | 0.45          | 77                   | 88   | 87                 | 93   | 90                   | 72                        | 75         | 500                 | 530   | 540   | LIC          | 1.1   |
| Thailand          | 44                    | 72   | 0.13          | 71                   | 85   | 83                 | 91   | 99                   | 97                        | 91         | 3730                | 4150  | 4440  | UMIC         | 1.7   |
| Togo              | 18                    | 59   | 0.27          | 69                   | 84   | 82                 | 91   | 81                   | 77                        | 75         | 520                 | 550   | 570   | LIC          | 1.8   |
| Tunisia           | 14                    | 57   | 0.005         | 78                   | 89   | 83                 | 91   | 98                   | 94                        | 72         | 4100                | 4150  | 4020  | LMIC         | 3.4   |
| Turkey            | 5                     | 53   | 0.005         | 86                   | 93   | 88                 | 94   | 97                   | 87                        | 68         | 9060                | 9890  | 10410 | UMIC         | 0.93  |
| Uganda            | 22                    | 61   | 0.74          | 57                   | 78   | 64                 | 82   | 82                   | 61                        | 75         | 470                 | 500   | 510   | LIC          | 1.4   |
| Ukraine           | 6                     | 53   | 0.11          | 76                   | 88   | 54                 | 77   | 50                   | 87                        | 85         | 2840                | 2990  | 3130  | LMIC         | 16    |
| Uruguay           | 31                    | 65   | 0.05          | 96                   | 98   | 76                 | 88   | 95                   | 96                        | 71         | 8640                | 10290 | 11860 | UMIC         | 0.24  |
| Uzbekistan        | 11                    | 56   | 0.01          | 45                   | 72   | 84                 | 92   | 99                   | 99                        | 68         | 1130                | 1300  | 1510  | LMIC         | 23    |
| <i>*Vanuatu</i>   | 0                     | 0    | 0             | 80                   | 90   | 93                 | 96   | 68                   | 61                        | 73         | 2520                | 2580  | 2730  | LMIC         | 0     |
| <i>*Venezuela</i> | 0                     | 0    | 0             | 68                   | 84   | 83                 | 91   | 78                   | 79                        | 71         | 10230               | 11630 | 11820 | UMIC         | 0.52  |
| Viet Nam          | 19                    | 59   | 0.04          | 55                   | 77   | 92                 | 96   | 95                   | 89                        | 73         | 1030                | 1160  | 1270  | LMIC         | 2.7   |
| <i>*Yemen</i>     | 0                     | 0    | 0             | 67                   | 83   | 87                 | 93   | 81                   | 66                        | 72         | 1070                | 1160  | 1070  | LMIC         | 1.7   |
| Zambia            | 37                    | 68   | 1.17          | 73                   | 86   | 90                 | 95   | 81                   | 75                        | 75         | 1070                | 1110  | 1160  | LMIC         | 1.8   |
| Zimbabwe          | 24                    | 62   | 0.84          | 52                   | 76   | 75                 | 87   | 99                   | 82                        | 75         | 380                 | 500   | 660   | LIC          | 1.9   |

600 \*Those countries removed from the final analysis due to an inability to find a fit are shown in italics. †Methods for determining the level at 2020 are given in  
601 the text (Modelling methods in full).

602 **(8) Vaccine impact in LMIC and UMIC, and results with productivity costs**

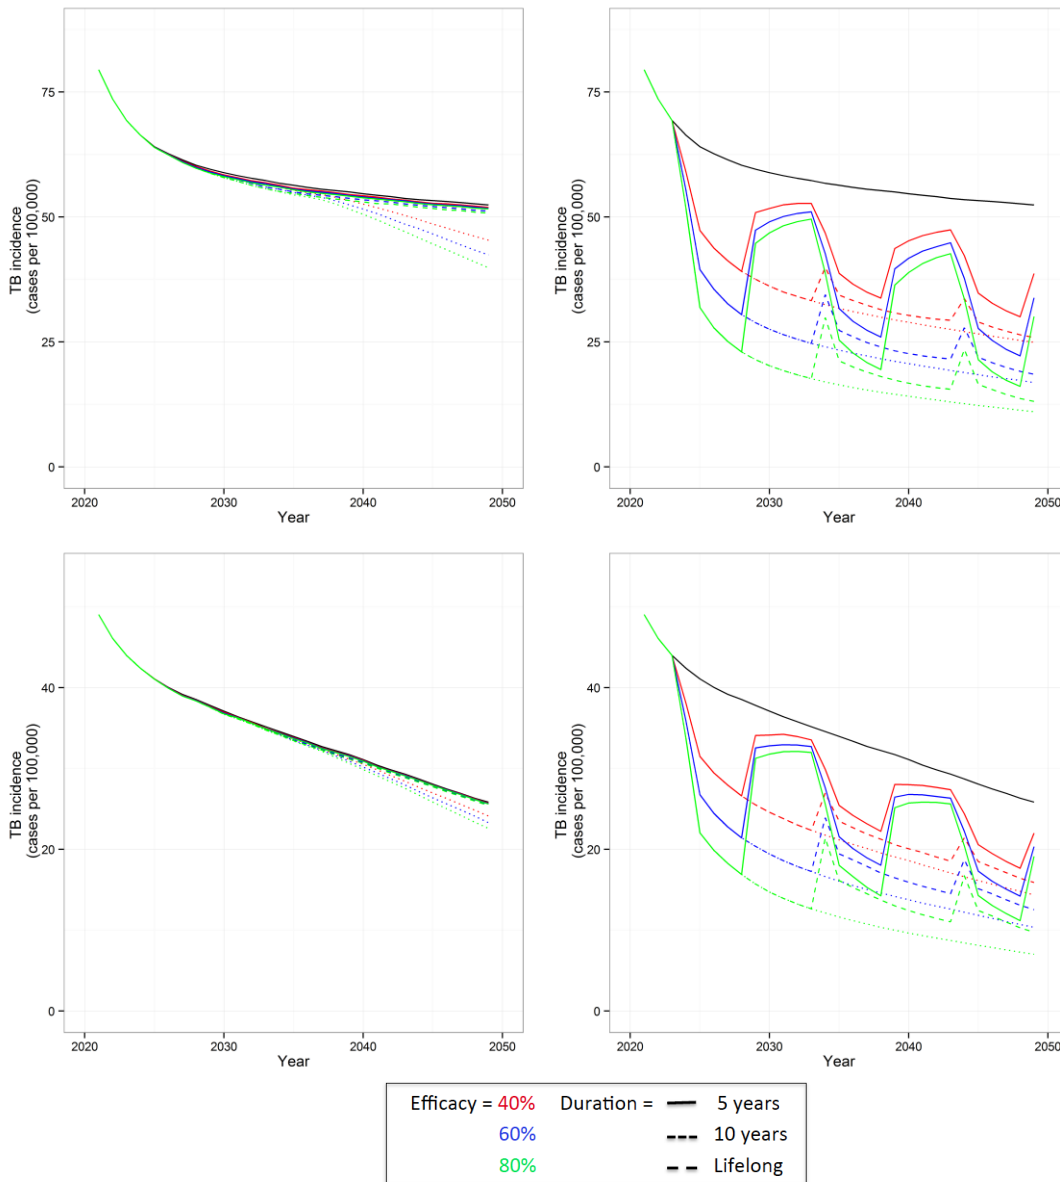

606 **Figure S6: A vaccine targeted at infants (left) has a smaller impact on TB disease incidence than**  
 607 **one targeted at adolescents/adults (right).** Shown here is the median TB disease incidence of the  
 608 calibrated runs for LMIC (top) and UMIC (bottom) (black line). The different colours represent  
 609 different example vaccine efficacies (red, blue, green), whilst the line types represent example vaccine  
 610 durations of protection. The ‘waves’ within the adolescent/adult incidence figure are due to mass  
 611 campaigns.



613 **Table S4: Impact of introduction of a new TB vaccine across 2024-2050 with societal perspective: Percentage reduction in tuberculosis (TB) cases,**  
 614 **Cost per DALY averted and cost-effective (CE) vaccine price, by income group, vaccine age target group, vaccine duration of protection and**  
 615 **vaccine efficacy.**

|                                                 |      | LIC (GNI = \$563)      |                                    |                      |                          | LMIC (GNI = \$2,250)   |                                    |                      |                          | UMIC (GNI = \$ 7,149)  |                                      |                      |                          |
|-------------------------------------------------|------|------------------------|------------------------------------|----------------------|--------------------------|------------------------|------------------------------------|----------------------|--------------------------|------------------------|--------------------------------------|----------------------|--------------------------|
| <b>Without new vaccine [median (95% range)]</b> |      |                        |                                    |                      |                          |                        |                                    |                      |                          |                        |                                      |                      |                          |
| Total cases (millions)                          |      | 32 (23-44)             |                                    |                      |                          | 46 (30-87)             |                                    |                      |                          | 19 (11-32)             |                                      |                      |                          |
| Total deaths (millions)                         |      | 4.2 (2.2-7.1)          |                                    |                      |                          | 5.0 (2.0-13.5)         |                                    |                      |                          | 0.9 (0.3-3.5)          |                                      |                      |                          |
| <b>With new vaccine [median (95% range)]</b>    |      |                        |                                    |                      |                          |                        |                                    |                      |                          |                        |                                      |                      |                          |
| Dur.                                            | Eff. | Reduction in cases (%) | Cost per DALY averted (US\$1000s)* |                      | CE vaccine price (US\$)† | Reduction in cases (%) | Cost per DALY averted (US\$1000s)* |                      | CE vaccine price (US\$)† | Reduction in cases (%) | Cost per DALY averted (US\$10,000s)* |                      | CE vaccine price (US\$)† |
|                                                 |      |                        | Health sector perspective          | Societal perspective |                          |                        | Health sector perspective          | Societal perspective |                          |                        | Health sector perspective            | Societal perspective |                          |
| <b>Infant</b>                                   |      |                        |                                    |                      |                          |                        |                                    |                      |                          |                        |                                      |                      |                          |
| 5 yr                                            | 40%  | 1.0 (0.6-1.6)          | 4.72 (1.78-12.77)                  | 4.66 (1.79-13.01)    | NA                       | 0.6 (0.3-1.3)          | 33.11 (9.94-91.32)                 | 33.98 (8.50-127.71)  | NA                       | 0.3 (0.1-0.7)          | 54.42 (5.84-232.15)                  | 53.41 (5.94-238.90)  | NA                       |
|                                                 | 60%  | 1.5 (0.9-2.4)          | 3.09 (1.17-8.39)                   | 3.09 (1.17-8.63)     | NA                       | 0.9 (0.4-2.0)          | 21.55 (6.60-60.68)                 | 22.04 (54.45-84.41)  | 0.11 (NA-1.55)           | 0.4 (0.1-1.1)          | 34.87 (3.76-150.75)                  | 33.52 (3.69-158.41)  | 0.24 (NA-3.24)           |
|                                                 | 80%  | 1.9 (1.2-3.2)          | 2.28 (0.87-6.24)                   | 2.19 (0.82-6.24)     | 0.07 (NA-0.86)           | 1.2 (0.6-2.7)          | 15.82 (4.63-45.06)                 | 16.13 (3.98-62.66)   | 0.42 (NA-2.40)           | 0.5 (0.2-1.4)          | 25.39 (2.58-110.06)                  | 23.60 (2.28-117.03)  | 0.66 (NA-4.71)           |
| 10 yr                                           | 40%  | 1.8 (1.1-2.9)          | 2.61 (0.98-7.11)                   | 2.55 (0.97-7.35)     | NA                       | 1.1 (0.5-2.4)          | 18.24 (5.32-51.85)                 | 18.33 (4.54-71.68)   | 0.25 (NA-1.97)           | 0.5 (0.2-1.3)          | 28.63 (3.08-128.89)                  | 26.95 (3.02-133.87)  | 0.42 (NA-4.33)           |
|                                                 | 60%  | 2.7 (1.6-4.3)          | 1.69 (0.63-4.60)                   | 1.62 (0.57-4.7)      | 0.28 (NA-1.29)           | 1.7 (0.8-3.6)          | 11.62 (3.47-34.52)                 | 11.89 (2.50-46.72)   | 0.82 (NA-3.26)           | 0.7 (0.3-1.9)          | 18.11 (1.67-80.91)                   | 16.55 (1.46-84.04)   | 1.25 (NA-6.84)           |
|                                                 | 80%  | 3.5 (2.1-5.7)          | 1.22 (0.44-3.50)                   | 1.13 (0.39-3.36)     | 0.54 (NA-1.97)           | 2.3 (1.1-4.8)          | 8.38 (2.52-25.45)                  | 8.40 (1.73-34.55)    | 1.36 (0.06-4.50)         | 0.9 (0.4-2.6)          | 12.34 (1.06-59.97)                   | 11.39 (0.18-60.43)   | 2.06 (NA-9.14)           |
| Lifelong                                        | 40%  | 6.2 (4.1-8.3)          | 0.65 (0.26-1.87)                   | 0.56 (0.20-1.67)     | 1.26 (0.25-3.03)         | 3.9 (2.1-6.2)          | 5.12 (1.31-18.63)                  | 4.47 (1.02-17.26)    | 2.39 (0.37-7.76)         | 1.6 (0.6-3.1)          | 5.38 (0.42-32.15)                    | 4.66 (CS-31.37)      | 3.53 (0.23-11.75)        |
|                                                 | 60%  | 8.9 (5.9-11.9)         | 0.40 (0.15-1.20)                   | 0.30 (0.07-1.02)     | 2.07 (0.61-4.47)         | 5.7 (3.1-9.0)          | 2.99 (0.68-11.45)                  | 2.55 (0.37-10.77)    | 3.97 (0.89-11.27)        | 2.3 (0.9-4.6)          | 2.75 (CS-20.33)                      | 1.81 (CS-18.24)      | 5.81 (0.90-18.82)        |
|                                                 | 80%  | 11.5 (7.6-15.2)        | 0.30 (0.08-0.83)                   | 0.16 (CS-0.70)       | 2.81 (1.01-5.82)         | 7.4 (4.0-11.7)         | 2.03 (0.24-8.61)                   | 1.62 (CS-7.52)       | 5.40 (1.49-15.06)        | 3.1 (1.2-6)            | 1.36 (CS-13.99)                      | 0.71 (CS-12.64)      | 8.15 (1.48-23.58)        |
| <b>Adolescent/Adult</b>                         |      |                        |                                    |                      |                          |                        |                                    |                      |                          |                        |                                      |                      |                          |
| 5 yr                                            | 40%  | 23.9 (18.8-29.1)       | 0.63 (0.30-1.38)                   | 0.50 (0.23-1.24)     | 1.30 (0.39-2.89)         | 24.3 (18.3-32)         | 3.50 (1.48-9.17)                   | 3.71 (0.93-11.88)    | 3.45 (1.13-7.1)          | 17.5 (11.2-25.8)       | 2.45 (CS-11.61)                      | 1.46 (CS-9.45)       | 6.97 (2.39-15.87)        |
|                                                 | 60%  | 33.1 (26.3-39.7)       | 0.38 (0.15-0.88)                   | 0.26 (0.04-0.73)     | 2.18 (0.85-4.27)         | 33.9 (26.0-43.4)       | 2.05 (0.79-5.75)                   | 2.04 (0.21-7.21)     | 5.36 (2.29-9.94)         | 25.0 (16.3-36.1)       | 0.40 (CS-5.70)                       | CS (CS-3.85)         | 10.90 (4.47-22.22)       |
|                                                 | 80%  | 40.7 (32.8-48.2)       | 0.26 (0.08-0.65)                   | 0.14 (CS-0.45)       | 2.88 (1.30-5.37)         | 41.9 (33.1-52.9)       | 1.28 (0.27-3.95)                   | 1.11 (CS-4.70)       | 7.08 (3.31-12.33)        | 31.9 (21.1-44.9)       | CS (CS--3.28)                        | CS (CS-1.56)         | 14.69 (6.10-28.89)       |
| 10 yr                                           | 40%  | 39.6 (32.7-46.4)       | 0.28 (0.09-0.69)                   | 0.16 (CS-0.49)       | 2.73 (1.20-5.19)         | 39.6 (31.6-49.4)       | 1.53 (0.47-4.48)                   | 1.39 (CS-5.32)       | 6.44 (3.01-11.58)        | 30.4 (21.3-41.0)       | CS (CS-3.37)                         | CS (CS-2.48)         | 13.18 (5.62-25.48)       |
|                                                 | 60%  | 52.1 (44.1-59.5)       | 0.15 (CS-0.39)                     | 0.03 (CS-0.23)       | 3.98 (2.05-7.07)         | 52.8 (44.0-63.4)       | 0.72 (CS-2.54)                     | 0.44 (CS-2.70)       | 9.04 (4.58-15.87)        | 42.4 (30.8-54.9)       | CS (CS-1.10)                         | CS (CS-0.16)         | 19.95 (9.25-37.04)       |
|                                                 | 80%  | 61.8 (53.5-69.0)       | 0.07 (CS-0.24)                     | CS (CS-0.10)         | 5.03 (2.75-8.48)         | 63.5 (54.9-73.5)       | 0.26 (CS-1.59)                     | CS (CS-1.52)         | 11.52 (6.20-19.48)       | 53.0 (39.7-66.2)       | CS (CS-0.28)                         | CS (CS-CS)           | 25.78 (12.14-47.90)      |
| Lifelong                                        | 40%  | 44.1 (38.4-49.9)       | 0 (CS-0.13)                        | CS (CS-0.08)         | 7.39 (3.93-12.54)        | 42.1 (34.6-50.9)       | 0.14 (CS-1.49)                     | CS (CS-0.71)         | 13.25 (6.19-28.43)       | 34.4 (28.6-43.2)       | CS (CS-CS)                           | CS (CS-CS)           | 30.38 (13.54-55.94)      |
|                                                 | 60%  | 58.5 (52.6-64.3)       | CS (CS-0.05)                       | CS (CS-CS)           | 10.10 (5.67-16.47)       | 56.6 (48.7-65.6)       | CS (CS-0.48)                       | CS (CS-CS)           | 18.31 (9.12-39.20)       | 48.5 (41.5-57.8)       | CS (CS-CS)                           | CS (CS-CS)           | 41.95 (20.91-82.04)      |
|                                                 | 80%  | 70.0 (64.4-75.0)       | CS (CS-CS)                         | CS (CS-CS)           | 12.22 (7.00-19.82)       | 68.3 (61.0-76.2)       | CS (CS-0.05)                       | CS (CS-CS)           | 22.56 (11.23-44.06)      | 61.0 (53.5-69.7)       | CS (CS-CS)                           | CS (CS-CS)           | 54.49 (26.16-97.53)      |

616 \* Discounting included. Societal perspective includes productivity costs. CS: cost-saving (i.e. negative cost per DALY, the intervention was dominant).

617 †Discounting included. NA indicates that a negative vaccine price is cost-effective

618 **(9) Sensitivity and uncertainty analysis**

619

620 **PRCC analysis**

621 Partial rank correlation coefficients (PRCCs) were used to investigate the relative influence of  
622 individual parameters on the model outcomes (18, 65-67). We used the parameters from each of the  
623 model fits to calculate PRCCs. The outcome was the percentage of TB cases in HIV negatives averted  
624 by 2050 by a vaccine with 60% efficacy and 10 year duration of protection (the mid-range vaccine  
625 profile) targeted at adolescent/adults or infants. The parameters with the greatest influence (PRCC >  
626 0.5 in the targeting adolescents/adults strategy or targeting infants strategy) and with medium  
627 influence in both strategies (PRCC > 0.1 in both targeting adolescents/adults strategy and targeting  
628 infants strategy) are shown in Figure S7.

629 This shows that  $\alpha$ , the parameter governing HIV-progression, *CDRscale* (the parameter used  
630 to multiply the CDR from the data), *padult* and *pchild* (the proportion of infections that progress to  
631 active disease in adults and children respectively) are important. All parameters influence  
632 (increase/decrease) the percentage of TB cases averted as would be expected. For example, increasing  
633 the *CDRscale* reduces the number of cases in the population (as more are found and treated) and  
634 hence the % averted will be lower. Thus the correlation between *CDRscale* and percentage of cases  
635 averted is negative (Figure S7).

636

637

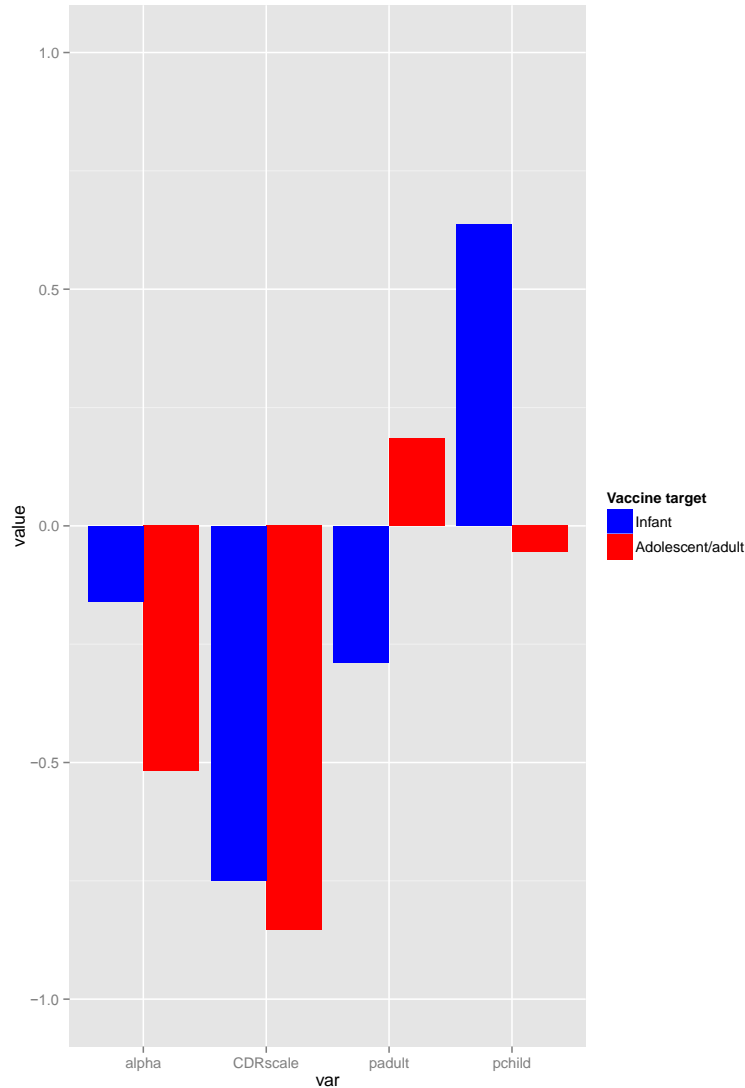

638  
 639 **Figure S7: Partial rank correlation coefficients for the parameters with the greatest influence on**  
 640 **the percentage of cases averted at 2050 (PRCC > 0.1) for a vaccine with 60% efficacy and 10**  
 641 **year duration of protection targeted at infants (blue) or adolescent/adults (red).**

642  
 643  
 644

645 **Scenario 1: Less optimistic TB control scale-up**

646 In the main analysis, we include an optimistic scale-up of TB control, halving the difference between  
 647 current levels in a country and 100%. In this analysis, we consider a less dramatic scale-up, increasing  
 648 the current levels in a country by 25% of the difference between current levels of 100% coverage.

649 *Results*

650 With the decreased scale-up in TB control, there are more TB cases and deaths over the 2024-2050  
 651 time period than in the main analysis (Figure S8). The vaccines thus have a greater impact (Figure  
 652 S9). As in the main analysis, a new TB vaccine targeted at infants was predicted to avert less than  
 653 12% of TB cases, compared to up to 67% when targeted at adolescent/adults.

654 With a larger TB burden in the absence of a new TB vaccine, the vaccines are predicted to  
 655 avert a higher percentage of cases and thus be more cost-effective. When targeting infants, with our  
 656 tiered pricing structure and with the lower TB control scale-up, all life-long duration of protection  
 657 vaccine profiles are cost-effective in all three income-groups (Table S5). In UMIC, the higher efficacy

658 vaccine profiles become cost-saving. Moreover, in LIC, a 10 year duration of protection vaccine with  
 659 80% efficacy could be cost-effective at an estimate cost per DALY averted of \$420 (\$190-\$820).

660 All vaccine profiles targeted at adolescent/adults with the reduced, non-conservative scale-up  
 661 in TB control are estimated to be cost-effective. For all income groups, vaccines with duration of  
 662 protection of at least 10 years and/or efficacy greater than 60% are estimated to be cost-saving. In  
 663 UMIC, all vaccine profiles are cost-saving.

664 With the inclusion of productivity costs, more profiles are considered to be cost-saving, with  
 665 an increasing number of infant targeted profiles becoming cost-saving. Similarly, higher vaccine  
 666 prices were cost-effective when the vaccine profile was targeted at adolescent/adults. These were over  
 667 double the levels in the optimistic TB control scale-up.

668  
 669

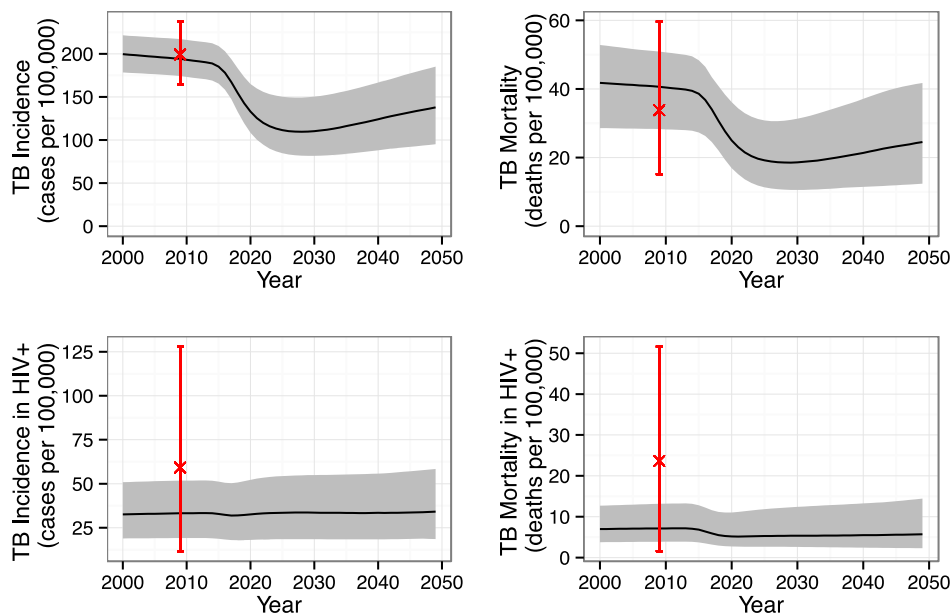

670  
 671

672 **Figure S8: TB burden and vaccine impact for LICs in the less optimistic TB control scenario.**

673 Top figures show calibration and prediction of TB incidence (left) and mortality (right) for those  
 674 without HIV (top two graphs), and those with HIV (bottom two graphs).

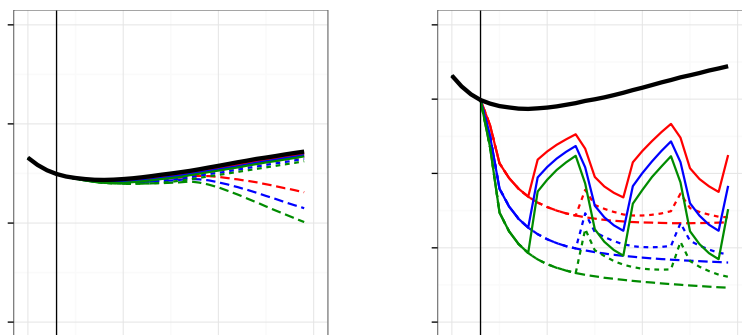

675

676 **Figure S9: Impact of vaccines on TB incidence in LICs in the less optimistic TB control**  
 677 **scenario.** The impact of vaccines targeted at infants (left) is smaller than the impact of  
 678 adolescent/adult targeted vaccines (right).

679 **Table S5: Impact of introduction of a new TB vaccine across 2024-2050: Percentage reduction in tuberculosis (TB) cases, Cost per DALY averted**  
 680 **and cost-effective (CE) vaccine price, by income group, vaccine age target group, vaccine duration of protection and vaccine efficacy in Scenario 1:**  
 681 **Less optimistic TB control scale-up.** Differences in cost-effectiveness conclusions to main analysis are shown in bold.

|                                          |      | LIC (GNI = \$563)      |                                    |                         |                          | LMIC (GNI = \$2,250)   |                                    |                         |                          | UMIC (GNI = \$ 7,149)  |                                      |                       |                          |
|------------------------------------------|------|------------------------|------------------------------------|-------------------------|--------------------------|------------------------|------------------------------------|-------------------------|--------------------------|------------------------|--------------------------------------|-----------------------|--------------------------|
| Without new vaccine [median (95% range)] |      |                        |                                    |                         |                          |                        |                                    |                         |                          |                        |                                      |                       |                          |
| Total cases (millions)                   |      | 51 (42-61)             |                                    |                         |                          | 85 (60-118)            |                                    |                         |                          | 29 (20-41)             |                                      |                       |                          |
| Total deaths (millions)                  |      | 8.7 (6.0-11.7)         |                                    |                         |                          | 12.1 (7.6-20.7)        |                                    |                         |                          | 2.4 (1.3-4.9)          |                                      |                       |                          |
| With new vaccine [median (95% range)]    |      |                        |                                    |                         |                          |                        |                                    |                         |                          |                        |                                      |                       |                          |
| Dur.                                     | Eff. | Reduction in cases (%) | Cost per DALY averted (US\$1000s)* |                         | CE vaccine price (US\$)† | Reduction in cases (%) | Cost per DALY averted (US\$1000s)* |                         | CE vaccine price (US\$)† | Reduction in cases (%) | Cost per DALY averted (US\$10,000s)* |                       | CE vaccine price (US\$)† |
|                                          |      |                        | Health sector perspective          | Societal perspective    |                          |                        | Health sector perspective          | Societal perspective    |                          |                        | Health sector perspective            | Societal perspective  |                          |
| <b>Infant</b>                            |      |                        |                                    |                         |                          |                        |                                    |                         |                          |                        |                                      |                       |                          |
| 5 yr                                     | 40%  | 1.3 (0.9-1.8)          | 1.84 (0.97-3.46)                   | 1.76 (0.91-3.35)        | 0.18 (NA-0.73)           | 0.9 (0.5-1.6)          | 10.93 (4.17-25.41)                 | 10.53 (3.98-24.60)      | 0.79 (NA-2.63)           | 0.5 (0.2-0.9)          | 12.34 (2.99-33.65)                   | 11.48 (2.59-32.23)    | 1.51 (0.01-4.80)         |
|                                          | 60%  | 1.9 (1.4-2.7)          | 1.18 (0.62-2.25)                   | 1.10 (0.56-2.13)        | 0.55 (0.09-1.32)         | 1.3 (0.8-2.4)          | 6.90 (2.53-16.53)                  | 6.51 (2.30-15.92)       | 1.58 (0.41-4.49)         | 0.7 (0.4-1.3)          | 7.07 (1.60-21.06)                    | 6.17 (0.90-20.16)     | 2.86 (0.58-7.58)         |
|                                          | 80%  | 2.5 (1.8-3.6)          | 0.85 (0.44-1.61)                   | 0.76 (0.38-1.51)        | 0.91 (0.31-1.92)         | 1.8 (1.0-3.2)          | 4.94 (1.70-12.37)                  | 4.51 (1.45-11.57)       | 2.42 (0.79-6.05)         | 0.9 (0.5-1.7)          | 4.66 (0.52-14.64)                    | 3.79 (CS-13.35)       | 4.22 (1.10-10.91)        |
| 10 yr                                    | 40%  | 2.3 (1.7-3.3)          | 0.98 (0.50-1.89)                   | 0.90 (0.44-1.79)        | 0.73 (0.19-1.66)         | 1.6 (1.0-3.0)          | 5.75 (2.12-14.01)                  | 5.30 (1.81-13.38)       | 2.00 (0.61-5.29)         | 0.8 (0.5-1.6)          | 5.55 (0.86-17.01)                    | 4.71 (CS-15.84)       | 3.61 (0.90-9.53)         |
|                                          | 60%  | 3.5 (2.5-4.9)          | 0.61 (0.30-1.15)                   | <b>0.54 (0.23-1.05)</b> | 1.36 (0.58-2.69)         | 2.5 (1.5-4.4)          | 3.47 (1.16-8.74)                   | 3.06 (0.84-8.08)        | 3.46 (1.32-8.25)         | 1.3 (0.7-2.4)          | 2.75 (CS-10.20)                      | 1.95 (CS-8.84)        | 5.84 (1.93-13.53)        |
|                                          | 80%  | 4.6 (3.3-6.5)          | <b>0.42 (0.19-0.82)</b>            | <b>0.33 (0.12-0.72)</b> | 2.00 (0.97-3.71)         | 3.3 (1.9-5.8)          | 2.33 (0.66-6.06)                   | <b>1.93 (0.30-5.62)</b> | 4.86 (2.02-11.50)        | 1.7 (0.9-3.1)          | 1.40 (CS-6.89)                       | <b>0.67 (CS-5.88)</b> | 8.23 (2.85-19.97)        |
| Life-long                                | 40%  | 8.3 (6.9-9.7)          | <b>0.17 (0.78-0.34)</b>            | <b>0.09 (CS-0.23)</b>   | 3.84 (2.30-5.75)         | 5.8 (4.5-7.7)          | <b>0.99 (0.21-2.48)</b>            | <b>0.58 (CS-1.89)</b>   | 8.64 (4.71-15.41)        | 2.8 (2.1-4.1)          | 0.94 (CS-1.78)                       | <b>CS (CS-1.21)</b>   | 13.83 (6.91-24.14)       |
|                                          | 60%  | 11.9 (10-13.7)         | 0.07 (CS-0.18)                     | CS (CS-0.08)            | 5.80 (3.56-8.38)         | 8.5 (6.6-11.1)         | 0.35 (CS-1.22)                     | CS (CS-0.75)            | 12.80 (7.29-22.59)       | 4.2 (3.2-6.0)          | <b>CS (CS-0.73)</b>                  | <b>CS (CS-0.28)</b>   | 20.81 (10.04-37.22)      |
|                                          | 80%  | 15.2 (12.8-17.5)       | 0.02 (CS-0.10)                     | CS (CS-0.02)            | 7.58 (4.85-10.97)        | 10.9 (8.5-14.2)        | 0.06 (CS-0.74)                     | CS (CS-0.32)            | 16.88 (9.78-29.61)       | 5.4 (4.2-7.9)          | <b>CS (CS-0.15)</b>                  | CS (CS-CS)            | 27.66 (14.01-49.46)      |
| <b>Adolescent/Adult</b>                  |      |                        |                                    |                         |                          |                        |                                    |                         |                          |                        |                                      |                       |                          |
| 5 yr                                     | 40%  | 30.1 (26.5-33.8)       | <b>0.17 (0.08-0.30)</b>            | 0.01 (CS-0.02)          | 4.14 (2.66-5.85)         | 31.4 (27.6-36.0)       | <b>0.87 (0.15-1.87)</b>            | <b>0.44 (CS-1.33)</b>   | 9.22 (5.72-14.69)        | 24.4 (17.9-31.2)       | <b>CS (CS-0.72)</b>                  | <b>CS (CS-0.22)</b>   | 17.96 (10.06-30.18)      |
|                                          | 60%  | 40.9 (36.4-45.5)       | 0.07 (CS-0.17)                     | CS (CS-0.07)            | 5.97 (3.89-8.30)         | 42.8 (37.9-48.1)       | 0.33 (CS-1.03)                     | CS (CS-0.57)            | 12.99 (8.23-20.90)       | 33.8 (25.2-42.4)       | CS (CS-CS)                           | CS (CS-CS)            | 25.68 (14.24-42.67)      |
|                                          | 80%  | 49.6 (44.6-54.4)       | 0.03 (CS-0.10)                     | CS (CS-0.00)            | 7.46 (5.07-10.30)        | 51.9 (46.5-57.6)       | 0.05 (CS-0.60)                     | CS (CS-0.18)            | 16.28 (10.4-25.37)       | 41.9 (31.7-51.7)       | CS (CS-CS)                           | CS (CS-CS)            | 32.19 (18.79-52.15)      |
| 10 yr                                    | 40%  | 48.0 (43.4-52.4)       | 0.04 (CS-0.11)                     | CS (CS-0.03)            | 7.19 (4.80-9.84)         | 49.1 (44.3-54.5)       | 0.17 (CS-0.72)                     | CS (CS-0.26)            | 15.16 (9.79-23.26)       | 39.6 (31.3-47.7)       | CS (CS-CS)                           | CS (CS-CS)            | 30.71 (17.01-50.08)      |
|                                          | 60%  | 61.3 (56.4-65.8)       | CS (CS-0.00)                       | CS (CS-CS)              | 9.60 (6.65-12.99)        | 63.1 (58.1-68.2)       | CS (CS-0.29)                       | CS (CS-CS)              | 20.3 (13.2-30.53)        | 53.0 (42.8-62.0)       | CS (CS-CS)                           | CS (CS-CS)            | 41.66 (23.43-68.54)      |
|                                          | 80%  | 70.8 (66.1-74.7)       | CS (CS -0.00)                      | CS (CS-CS)              | 11.46 (8.04-15.26)       | 73.1 (68.5-77.7)       | CS (CS-0.11)                       | CS (CS-CS)              | 23.74 (15.82-35.82)      | 63.5 (52.1-72.6)       | CS (CS-CS)                           | CS (CS-CS)            | 51.10 (30.15-86.00)      |
| Life-long                                | 40%  | 51.3 (47.7-55.2)       | CS (CS-CS)                         | CS (CS-CS)              | 16.78 (11.80-22.37)      | 50.9 (46.6-56.0)       | CS (CS-CS)                         | CS (CS-CS)              | 33.68 (22.46-51.21)      | 43.1 (37.3-49.9)       | CS (CS-CS)                           | CS (CS-CS)            | 64.37 (37.08-100.27)     |
|                                          | 60%  | 66.0 (62.5-69.7)       | CS (CS-CS)                         | CS (CS-CS)              | 21.81 (15.52-29.20)      | 65.6 (61.4-70.2)       | CS (CS-CS)                         | CS (CS-CS)              | 43.79 (29.08-65.39)      | 57.7 (51.6-64.4)       | CS (CS-CS)                           | CS (CS-CS)            | 87.72 (52.77-135.30)     |
|                                          | 80%  | 76.7 (73.6-79.6)       | CS (CS-CS)                         | CS (CS-CS)              | 25.63 (18.49-33.80)      | 76.3 (72.9-79.9)       | CS (CS-CS)                         | CS (CS-CS)              | 51.27 (34.41-75.18)      | 69.5 (63.9-75.3)       | CS (CS-CS)                           | CS (CS-CS)            | 106.94 (62.35-165.4)     |

683 **Scenario 2: Reduced HIV incidence scenario**

684 In the main analysis, HIV incidence remains constant at the 2009 level until 2050. In this scenario  
685 analysis, we reduced HIV incidence by 50%, at the same time and in the same way, as optimistic ART  
686 scale-up. This 50% reduction is in the middle of the range of impact found from modelling increased  
687 ART coverage (8) and in line with the reduction in discordant couples seen in (68).

688 *Results*

689 With the optimistic scale-up in TB control, and a 50% reduction in HIV incidence, the TB burden  
690 between 2024 and 2050 was low even with no vaccine introduction (Figure S10). The impact of the  
691 introduction of different vaccine profiles (Figure S11), was thus lower than in the main analysis with  
692 no HIV incidence reduction.

693 In terms of cost-effectiveness, from the health sector perspective, the results were similar to  
694 those with constant HIV incidence although a minority of vaccine profiles were no longer cost-  
695 effective (Table S6). When targeted at infants, only in LICs is the vaccine profile with the highest  
696 efficacy and lifelong duration of protection cost-effective. In LMICs and UMICs, no infant vaccine  
697 profiles considered were deemed cost-effective. Meanwhile, vaccines targeted at adolescent/adults  
698 could be cost-effective if duration of protection is greater than 5 years, or duration of protection is 5  
699 years and efficacy is greater than 80%. This is similar to the main analysis. When including  
700 productivity costs, a similar pattern was seen. Comparable vaccine prices were cost-effective with  
701 lower HIV incidence.

702 Thus despite there being fewer PLHIV, in whom the vaccine is less effective, with a lowered  
703 HIV incidence there is an overall lower burden of TB and hence a new TB vaccine would have the  
704 potential to avert fewer cases and thus be slightly less cost-effective in general. The main result  
705 remains, however, that a new TB vaccine targeted at adolescent/adults would be more cost-effective  
706 than one targeted at infants.

707

708

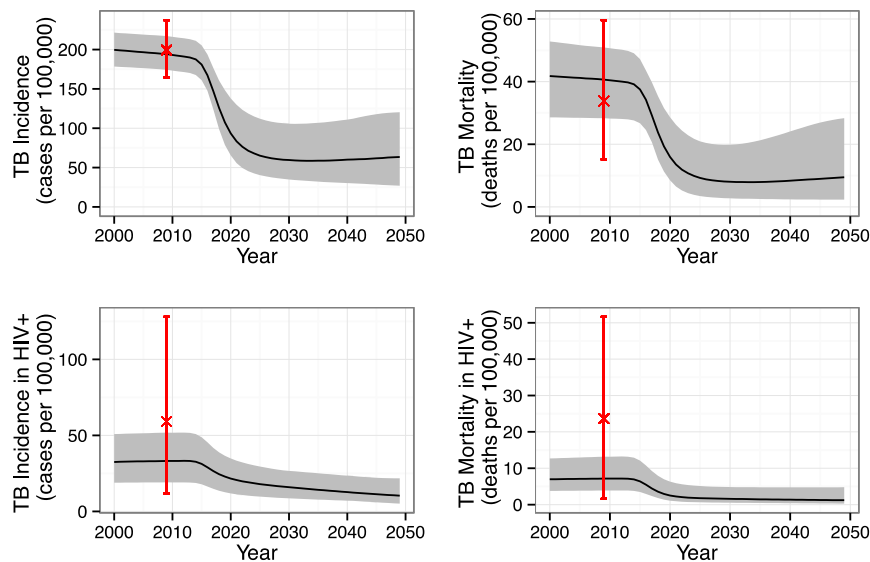

709

710 **Figure S10: TB burden and vaccine impact for LICs in the reduced HIV incidence scenario.** Top  
711 figures show calibration and prediction of TB incidence (left) and mortality (right) for those without  
712 HIV (top two graphs), and those with HIV (bottom two graphs).

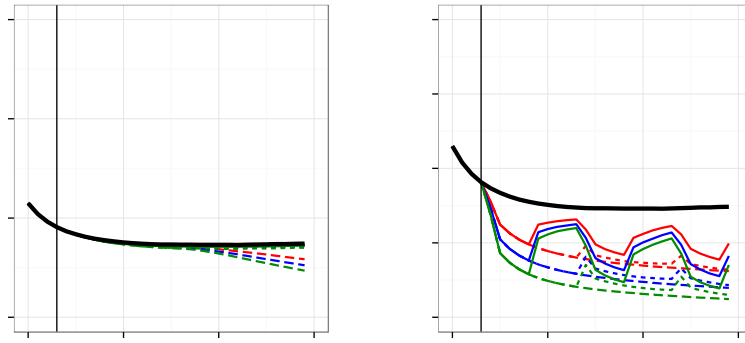

713

714 **Figure S11: Impact of vaccines on TB incidence in LICs in the reduced HIV incidence scenario.**  
 715 The impact of vaccines targeted at infants (left) is smaller than the impact of adolescent/adult targeted  
 716 vaccines (right).

717

718

719

720 **Table S6: Impact of introduction of a new TB vaccine across 2024-2050: Percentage reduction in tuberculosis (TB) cases, Cost per DALY averted**  
721 **and cost-effective (CE) vaccine price, by income group, vaccine age target group, vaccine duration of protection and vaccine efficacy in Scenario 2:**  
722 **reduced HIV incidence scenario.** Differences in cost-effectiveness conclusions to main analysis are shown in bold.

|                         |     | LIC (GNI = \$563)                        |                   |                                    |                    | LMIC (GNI = \$2,250)     |                          |                          |                                    | UMIC (GNI = \$ 7,149)     |                          |                        |                     |                                      |  |                          |  |
|-------------------------|-----|------------------------------------------|-------------------|------------------------------------|--------------------|--------------------------|--------------------------|--------------------------|------------------------------------|---------------------------|--------------------------|------------------------|---------------------|--------------------------------------|--|--------------------------|--|
|                         |     | Without new vaccine [median (95% range)] |                   |                                    |                    |                          |                          |                          |                                    |                           |                          |                        |                     |                                      |  |                          |  |
| Total cases (millions)  |     | 25 (17-34)                               |                   |                                    |                    | 41 (26-80)               |                          |                          |                                    | 15 (10-25)                |                          |                        |                     |                                      |  |                          |  |
| Total deaths (millions) |     | 3.4 (1.8-6.0)                            |                   |                                    |                    | 4.4 (1.7-12.4)           |                          |                          |                                    | 0.7 (0.3-2.2)             |                          |                        |                     |                                      |  |                          |  |
|                         |     | With new vaccine [median (95% range)]    |                   |                                    |                    |                          |                          |                          |                                    |                           |                          |                        |                     |                                      |  |                          |  |
|                         |     | Reduction in cases (%)                   |                   | Cost per DALY averted (US\$1000s)* |                    | CE vaccine price (US\$)† | Reduction in cases (%)   |                          | Cost per DALY averted (US\$1000s)* |                           | CE vaccine price (US\$)† | Reduction in cases (%) |                     | Cost per DALY averted (US\$10,000s)* |  | CE vaccine price (US\$)† |  |
|                         |     |                                          |                   | Health sector perspective          |                    | Societal perspective     |                          |                          |                                    | Health sector perspective |                          | Societal perspective   |                     |                                      |  |                          |  |
| <b>Infant</b>           |     |                                          |                   |                                    |                    |                          |                          |                          |                                    |                           |                          |                        |                     |                                      |  |                          |  |
| Dur. Eff.               |     |                                          |                   |                                    |                    |                          |                          |                          |                                    |                           |                          |                        |                     |                                      |  |                          |  |
| 5 yr                    | 40% | 0.2 (0-1.3)                              | 5.79 (2.15-16.78) | 5.69 (2.09-16.59)                  | -0.30 (-0.46-0.03) | 0.5 (0-1.7)              | 39.45 (9.51-15.70)       | 38.94 (9.20-15.62)       | -0.33 (-0.68-0.83)                 | 0.1 (0-0.2)               | 69.11 (9.59-279.43)      | 67.89 (9.12-276.96)    | -0.37 (-0.93-1.56)  |                                      |  |                          |  |
|                         | 60% | 0.3 (0-1.9)                              | 3.81 (1.40-11.19) | 3.71 (1.34-11.04)                  | -0.17 (-0.40-0.35) | 0.7 (0.1-2.6)            | 26.07 (6.20-104.21)      | 25.58 (5.91-10.35)       | -0.07 (-0.6-1.67)                  | 0.1 (0-0.2)               | 44.54 (6.15-186.18)      | 42.93 (5.88-184.60)    | 0.03 (-0.81-2.68)   |                                      |  |                          |  |
|                         | 80% | 0.4 (0-2.6)                              | 2.81 (1.04-8.28)  | 2.72 (0.97-8.10)                   | -0.04 (-0.36-0.65) | 0.9 (0.1-3.5)            | 19.27 (4.51-77.97)       | 18.76 (4.27-77.18)       | 0.19 (-0.52-2.49)                  | 0.1 (0-0.3)               | 32.83 (4.25-137.08)      | 31.17 (3.67-136.27)    | 0.42 (-0.75-4.15)   |                                      |  |                          |  |
| 10 yr                   | 40% | 0.4 (0-2.4)                              | 3.24 (1.17-9.48)  | 3.14 (1.13-9.24)                   | -0.10 (-0.37-0.50) | 0.8 (0.1-3)              | 22.10 (5.35-88.98)       | 21.51 (5.10-87.94)       | 0.05 (-0.56-2.01)                  | 0.1 (0-0.3)               | 37.35 (5.18-157.00)      | 36.12 (4.64-154.91)    | 0.18 (-0.77-3.59)   |                                      |  |                          |  |
|                         | 60% | 0.6 (0-3.6)                              | 2.12 (0.76-6.22)  | 2.02 (0.72-6.08)                   | 0.11 (-0.28-1.01)  | 1.3 (0.1-4.5)            | 14.23 (3.22-58.39)       | 13.71 (3.05-57.67)       | 0.52 (-0.43-3.46)                  | 0.2 (0-0.4)               | 23.84 (2.88-103.78)      | 22.46 (2.27-101.98)    | 0.84 (-0.62-5.55)   |                                      |  |                          |  |
|                         | 80% | 0.7 (0-4.8)                              | 1.55 (0.55-4.70)  | 1.45 (0.49-4.53)                   | 0.34 (-0.19-1.51)  | 1.7 (0.2-6)              | 10.39 (2.37-43.43)       | 9.80 (2.08-42.59)        | 0.97 (-0.3-4.81)                   | 0.2 (0-0.6)               | 16.29 (1.66-75.81)       | 15.10 (0.99-73.47)     | 1.52 (-0.45-7.6)    |                                      |  |                          |  |
| Life-long               | 40% | 1.3 (0.1-7)                              | 0.86 (0.33-2.55)  | 0.75 (0.28-2.36)                   | 0.90 (0.07-2.55)   | 2.9 (0.4-7.5)            | 6.10 (1.53-25.07)        | 5.55 (1.18-23.90)        | 1.97 (0.12-6.98)                   | 0.4 (0.1-1.2)             | 8.39 (0.88-43.16)        | 7.41 (0.09-40.83)      | 2.7 (-0.01-9.48)    |                                      |  |                          |  |
|                         | 60% | 2 (0.1-10.1)                             | 0.53 (0.20-1.61)  | 0.43 (0.13-1.40)                   | 1.57 (0.38-3.86)   | 4.2 (0.7-10.9)           | 3.71 (0.84-16.28)        | <b>3.22 (0.43-15.44)</b> | 3.31 (0.51-10.34)                  | 0.6 (0.2-1.8)             | 4.53 (CS-27.52)          | 3.52 (CS-26.30)        | 4.54 (0.64-14.1)    |                                      |  |                          |  |
|                         | 80% | 2.6 (0.1-12.8)                           | 0.37 (0.12-1.16)  | 0.28 (0.04-0.95)                   | 2.14 (0.67-5.00)   | 5.6 (0.9-14.1)           | <b>2.61 (0.39-11.84)</b> | 2.06 (CS-10.91)          | 4.49 (1.02-13.35)                  | 0.8 (0.3-2.3)             | 2.52 (CS-19.48)          | <b>1.62 (CS-17.77)</b> | 6.31 (1.06-19.81)   |                                      |  |                          |  |
| <b>Adolescent/Adult</b> |     |                                          |                   |                                    |                    |                          |                          |                          |                                    |                           |                          |                        |                     |                                      |  |                          |  |
| Dur. Eff.               |     |                                          |                   |                                    |                    |                          |                          |                          |                                    |                           |                          |                        |                     |                                      |  |                          |  |
| 5 yr                    | 40% | 12.2 (5.2-32.3)                          | 0.76 (0.34-1.78)  | <b>0.64 (0.27-1.56)</b>            | 1.02 (0.14-2.56)   | 10 (5.1-19.9)            | 4.91 (1.42-15.38)        | 4.28 (1.11-14.21)        | 2.47 (0.48-7.2)                    | 17.3 (15-20.9)            | 3.34 (CS-13.16)          | 1.86 (CS-11.53)        | 6.3 (2.06-14.47)    |                                      |  |                          |  |
|                         | 60% | 17.8 (7.8-43.4)                          | 0.49 (0.21-1.15)  | 0.36 (0.12-0.96)                   | 1.72 (0.58-3.73)   | 14.6 (7.6-27.9)          | <b>2.97 (0.70-9.81)</b>  | <b>2.33 (0.22-8.67)</b>  | 4.02 (1.25-10.43)                  | 25.4 (22.3-30.2)          | 0.83 (CS-6.83)           | CS (CS-5.05)           | 9.8 (3.92-20.51)    |                                      |  |                          |  |
|                         | 80% | 22.9 (10.3-51.9)                         | 0.35 (0.12-0.85)  | 0.22 (0.01-0.64)                   | 2.33 (0.94-4.73)   | 18.8 (10-34.8)           | 2.08 (0.37-7.21)         | 1.45 (CS-6.05)           | 5.29 (1.94-12.81)                  | 33.2 (29.5-38.7)          | CS (CS-3.80)             | CS (CS-2.29)           | 13.03 (5.67-26.3)   |                                      |  |                          |  |
| 10 yr                   | 40% | 23.5 (12.5-49.7)                         | 0.37 (0.16-0.92)  | 0.25 (0.06-0.71)                   | 2.19 (0.83-4.41)   | 20.9 (12.9-35.2)         | 2.41 (0.52-8.11)         | 1.72 (0.03-7.04)         | 4.77 (1.7-11.91)                   | 30 (26.6-34.2)            | 0.99 (CS-4.59)           | CS (CS-2.91)           | 11.57 (4.99-23.58)  |                                      |  |                          |  |
|                         | 60% | 33.3 (18.6-62.7)                         | 0.229 (0.05-0.58) | 0.10 (CS-0.40)                     | 3.16 (1.43-6.04)   | 29.6 (19.1-47.1)         | 1.36 (CS-4.72)           | 0.64 (CS-3.45)           | 6.78 (3.04-15.81)                  | 43.7 (39.4-48.2)          | CS (CS-1.73)             | CS (CS-0.60)           | 17.78 (7.85-33.95)  |                                      |  |                          |  |
|                         | 80% | 42.2 (24.5-72.5)                         | 0.14 (CS-0.41)    | 0.02 (CS-0.21)                     | 3.93 (1.96-7.15)   | 37.4 (25.1-56.5)         | 0.77 (CS-3.21)           | 0.09 (CS-2.02)           | 8.55 (4.08-18.56)                  | 56.5 (51.9-60.5)          | CS (CS-0.55)             | CS (CS-CS)             | 22.57 (10.69-42.28) |                                      |  |                          |  |
| Life-long               | 40% | 30 (20.4-52.7)                           | 0.06 (CS-0.25)    | CS (CS-0.09)                       | 5.68 (2.78-10.55)  | 30.8 (22-42.1)           | 0.29 (CS-2.14)           | CS (CS-1.10)             | 11.42 (5.18-26.2)                  | 31.2 (28.4-35.4)          | CS (CS-0.06)             | CS (CS-CS)             | 26.33 (12.32-50.08) |                                      |  |                          |  |
|                         | 60% | 42.9 (30.3-66.7)                         | CS (CS-0.09)      | CS (CS-CS)                         | 7.74 (4.18-13.43)  | 43.9 (32.5-56.7)         | CS (CS-0.78)             | CS (CS-0.06)             | 15.78 (7.7-33.82)                  | 45.4 (42-49.9)            | CS (CS-CS)               | CS (CS-CS)             | 37.22 (18.9-69.81)  |                                      |  |                          |  |
|                         | 80% | 54.6 (40-76.6)                           | CS (CS-0.04)      | CS (CS-CS)                         | 9.39 (5.21-15.57)  | 56.1 (42.8-68.8)         | CS (CS-0.23)             | CS (CS-CS)               | 19.09 (9.73-39.71)                 | 58.9 (55.1-62.7)          | CS (CS-CS)               | CS (CS-CS)             | 48.42 (23.69-86.54) |                                      |  |                          |  |



723 **(10) Cost-effective vaccine price calculations**

724 Our secondary outcome was the vaccine price that set the costs per DALY to be equal to the mean  
 725 Gross National Income per capita across each income group (Low- (LIC), Lower-middle (LMIC) and  
 726 Upper-middle- (UMIC)). This price is referred to as the cost-effective vaccine price. This is calculated  
 727 via a series of equations laid out below for non-discounted prices.

728 Costs per DALY averted

729 
$$= (\text{Net costs}) / (\# \text{ DALYs averted})$$

730 
$$= (\text{Vaccine costs} - \text{Treatment costs averted}) / (\# \text{ DALYs averted})(1)$$

731 The vaccine costs are comprised of the number of vaccines administered and the price of each  
 732 vaccine. The price of each vaccine is composed of four parts – the price of the dose (Vxd), the number  
 733 of doses (2), the price of each delivery (D) and the amount of vaccine wastage (5%).

734 
$$\text{Cost of vaccine } p = 2 \times Vxd_p \times (1/(1-0.05)) + 2 \times D_p \quad (2)$$

735 Substituting (2) into (1), letting  $N_p$  be the number of vaccines of type  $p$  given, gives (3).

736 Costs per DALY averted

737 
$$= \frac{(N_p (2 \times Vxd_p \times (1/(1-0.05)) + 2 \times D_p) - \text{Treatment costs averted})}{(\# \text{ DALYs averted})} \quad (3)$$

738

739 To be cost-effective, the costs per DALY averted must equal the mean GNI for the income group,  
 740 which when included in (3), with some rearrangement gives (4), the final formula.

741 
$$\text{Mean GNI} = \frac{(N_p (2 \times Vxd_p \times (1/(1-0.05)) + 2 \times D_p) - \text{Treatment costs averted})}{(\# \text{ DALYs averted})} \quad (3)$$

742

743 
$$\text{Mean GNI} \times \# \text{ DALYs averted} = (2N_p (Vxd_p \times (1/(0.95)) + D_p) - \text{Treatment costs averted})$$

744 
$$\underline{\text{Mean GNI} \times \# \text{ DALYs averted} + \text{Treatment costs averted}} = (Vxd_p \times (1/(0.95)) + D_i)$$

745 
$$2 N_p$$

746 
$$\underline{0.95(\text{Mean GNI} \times \# \text{ DALYs averted} + \text{Treatment costs averted})} = Vxd_p + (0.95) D_p$$

747 
$$2 N_p$$

748 
$$Vxd_p = 0.475 \frac{(\text{Mean GNI} \times \# \text{ DALYs averted} + \text{Treatment costs averted} - 2 \times N_p \times D_p)}{N_p} \quad (4)$$

749 
$$N_p$$

750

751

752

753

754 *With discounting*

755 To include discounting, the # DALYS averted and the treatment costs averted can be discounted  
 756 independently. Formula (3) then becomes (5) with a discount rate of  $dr$  (3%).

757

758 Costs per DALY averted = Mean GNI

759 
$$= \frac{\sum_{t=1}^n N_p(t) / (1 + dr)^t \times (2 \times Vxd_p \times (1/(1-0.05)) + 2 \times D_p) - \text{Disc. Treatment costs av.}}{(\text{Disc. } \# \text{ DALYs averted})} \quad (5)$$

760

761

762 Here  $\sum_{t=1}^n N_p(t) / (1 + dr)^t = \frac{(\text{No. } Vx_p \text{ at } t=1)}{(1+dr)^0} + \frac{(\text{No. } Vx_p \text{ at } t=2)}{(1+dr)^1} + \frac{(\text{No. } Vx_p \text{ at } t=3)}{(1+dr)^2} + \dots = dN_p$

763 where  $t = 1$  is 2024 and  $n = 2050-2024$ .

765 Discounting reduces the cost of giving a vaccine in the future, both in terms of delivery costs and dose  
 766 price. Note that as the vaccine price remains constant, the discounted vaccine costs can be calculated  
 767 by only discounting the number of vaccines given. The discounted number of vaccines of type  $p$  given  
 768 is  $dN_p$ . This changes (5) to (6), an equivalent of (3).

769

770 Costs per DALY averted =  
 771 Mean GNI =  $\frac{dN_p \times (2 \times V_{xd_p} \times (1/(1-0.05)) + 2 \times D_p) - \text{Disc. Treatment costs av.}}{(\text{Disc. \# DALYs averted})}$  (6)  
 772

773 Rearranging gives an equivalent but discounted Vx price (7).

774  
 775  $V_{xd_p} = 0.475 \frac{(\text{Mean GNI} \times \# \text{ DALYs averted} + \text{Treatment costs averted} - 2 \times dN_p \times D_p)}{dN_p}$  (7)  
 776  
 777

778  
 779

780 (11) DALY calculations

781

782 Disability Adjusted Life Years (DALYS) were calculated by summing the number of Years of Life  
 783 Lost (YLL) and Years Lost due to Disability (YLD). Each of these was calculated using the formulas  
 784 given by the Global Burden of Disease (GBD) project (69). The inputs from the model are number of  
 785 TB deaths, average age of death and number of TB cases in those with and without HIV. A 3 %  
 786 discounting rate was used for the discounted values. No age weighting was used (i.e. K = 0 in the  
 787 GBD formula).

788 For the YLL, the life expectancy at age of death was calculated by subtracting the average age  
 789 of death due to TB from the life expectancy for each country in that year. The total YLL was then the  
 790 sum over all years of the product of the life expectancy at age of death and the number of TB deaths  
 791 in each year.

792 For the YLD, the disability weights for TB disease in HIV negatives (0.331) and HIV  
 793 positives (0.399) was used and multiplied by the length of time disabled (set at 5 months) (70) and the  
 794 number of TB cases in each HIV category.

795 The total number of DALYS was then the sum of the above two values. We present both  
 796 discounted and non-discounted values in Table S4.

797  
 798  
 799

800 **(12) TB vaccine prices and delivery costs assumptions**

801 The price of new TB vaccines will not be known until they are on the market. Tiered pricing, where  
 802 low-income countries are charged less for vaccines than middle- and high-income countries, has been  
 803 common practice in the past decades (71). The GAVI Alliance has been able to obtain relatively  
 804 favourable vaccine prices for LICs and LMICs. GAVI vaccine prices per dose for rotavirus,  
 805 pneumococcal, Human Papilloma virus and meningococcal A are approximately \$4, \$5, \$4.50 and  
 806 \$0.60, respectively (72). Prices for non-GAVI eligible countries are generally not publicly available.  
 807 A study on *Haemophilus influenzae* type B vaccines showed that prices in UMICs were  
 808 approximately 3 times higher than GAVI prices (73). Our assumed TB prices per dose for the three  
 809 income groups are seen in Table S7. These prices are varied in our vaccine price sensitivity analysis  
 810 (what price makes the vaccine cost-effective?).

811 A number of studies have been undertaken on the costs of vaccine delivery in LICs and  
 812 LMICs, but we could not identify studies from UMICs. We assumed that delivery costs in UMICs  
 813 were 50% higher than in LICs, and costs in LMICs were in between these estimates. Delivery costs  
 814 in routine services were based on studies from Ethiopia and Vietnam. Costs in schools were derived  
 815 from a study on delivery of human papillomavirus vaccination to school-girls in Peru, Uganda and  
 816 Viet Nam. Campaign delivery costs were taken from a literature review on this topic by Gandhi and  
 817 Lydon (74).

818

819 **Table S7: Assumed TB vaccine prices and delivery costs**

|                                                                       | LIC     | LMIC    | UMIC     | References |
|-----------------------------------------------------------------------|---------|---------|----------|------------|
| <b>Vaccine price per dose</b>                                         | \$ 1.50 | \$ 5.00 | \$ 10.00 | Assumption |
| <i>Delivery costs per dose:</i>                                       |         |         |          |            |
| <b>Routine delivery alongside BCG and DTP at birth and six months</b> | \$ 0.59 | \$ 0.86 | \$ 1.18  | (62, 75)   |
| <b>In schools</b>                                                     | \$ 1.30 | \$ 1.95 | \$ 2.60  | (76)       |
| <b>In mass campaigns</b>                                              | \$ 0.86 | \$ 1.29 | \$ 1.72  | (63, 74)   |

820

821

822 **(13) Treatment costs**

823

824 ***Introduction***

825 The study objective was to estimate treatment costs per patient with TB and MDR-TB for the 91 low-  
826 and middle-income countries (LMICs) included in the cost-effectiveness analysis. Other studies have  
827 shown correlation between treatment costs and Gross National Income (GNI) per capita (73, 77). We  
828 undertook a systematic literature review to retrieve country-specific treatment cost estimates and used  
829 these data points to construct a regression equation with GNI as the independent variable.

830 These costs were used to multiply the number of treatment cases in order to generate the total costs  
831 spend on treatment. This minus the cost of vaccine delivery and dosage gave the net cost.

832

833

834 ***Systematic literature review***

835 A literature review was conducted to determine mean treatment costs per patient with TB and MDR-  
836 TB. Five databases were searched; EMBASE, Medline, National Health Service Economic Evaluation  
837 Database, Cost-effectiveness Registry, and Pan American Journal of Public Health. The search period  
838 was from January 1990 until April 2013. Search terms were a combination of “tuberculosis”,  
839 “multidrug resistant tuberculosis”, “cost”, and “treatment”. Full details of the search methods, papers  
840 included, data abstraction and quality assessment will be described in a paper by Laurence *et al.* (78).

841 Seventy one studies on TB and sixteen studies on MDR-TB treatment costs were included in the  
842 literature review. For TB and MDR-TB, 45 and 15 countries were represented, respectively. Data  
843 were available from nine high-income countries (HICs), 12 UMICs, 12 LMICs and 13 LICs. Costs  
844 were converted to 2012 US\$ values, using consumer price indices ([imf.org/external/data.htm](http://imf.org/external/data.htm)) and  
845 average annual exchange rates ([oanda.com/currency/historical-rates/](http://oanda.com/currency/historical-rates/)). For countries with more than  
846 one study available, we chose to use the estimate we considered of highest quality (according to the  
847 criteria that will be described in Laurence *et al.* (78)). For studies that compared the costs of more  
848 than one treatment strategy, we selected the intervention considered most likely to be the current  
849 standard practice in the respective country. Only half of the papers reported productivity costs and  
850 since widely different methods were used for estimating these, productivity costs were not abstracted  
851 The estimates are seen in Tables S8 and S9.

852 **Table S8. Estimates of TB treatment costs derived from the literature review (n=45) (2012 US\$)**

| Country          | GNI per capita | Costs per patient | Country        | GNI per capita | Costs per patient |
|------------------|----------------|-------------------|----------------|----------------|-------------------|
| Sierra Leone     | 340            | 32                | Indonesia      | 2,940          | 520               |
| Malawi           | 360            | 228               | Ukraine        | 3,130          | 1276              |
| Ethiopia         | 370            | 68                | Ecuador        | 4,200          | 484               |
| Uganda           | 510            | 339               | Thailand       | 4,440          | 456               |
| Nepal            | 540            | 108               | China          | 4,940          | 436               |
| Tanzania         | 540            | 77                | Dominican Rep. | 5,240          | 148               |
| Burkina Faso     | 570            | 105               | Colombia       | 6,070          | 948               |
| Zimbabwe         | 660            | 43                | South Africa   | 6,960          | 1,061             |
| Haiti            | 700            | 1,937             | Botswana       | 7,470          | 2,887             |
| Bangladesh       | 780            | 93                | Malaysia       | 8,770          | 1,211             |
| Cambodia         | 820            | 621               | Mexico         | 9,420          | 5,187             |
| Kenya            | 820            | 64                | Brazil         | 10,720         | 985               |
| Tajikistan       | 870            | 464               | Russia         | 10,730         | 6,307             |
| Pakistan         | 1,120          | 166               | Latvia         | 12,350         | 16,008            |
| Zambia           | 1,160          | 13                | Taiwan         | 19,980         | 1,062             |
| Vietnam          | 1,270          | 165               | New Zealand    | 29,140         | 14,666            |
| Nigeria          | 1,280          | 120               | Spain          | 30,890         | 9,633             |
| Sudan            | 1,310          | 307               | Italy          | 35,290         | 26,226            |
| India            | 1,410          | 242               | United         | 37,840         | 12,642            |
| Ghana            | 1,410          | 145               | Canada         | 45,560         | 11,478            |
| Philippines      | 2,210          | 286               | United States  | 48,620         | 17,086            |
| Egypt            | 2,600          | 229               | Australia      | 49,130         | 9,210             |
| Syrian Arab Rep. | 2,750          | 210               |                |                |                   |

853

854 **Table S9. Estimates of MDR treatment costs derived from the literature review (n=15) (2012 US\$)**

855

| Country        | GNI per capita | Costs per patient |
|----------------|----------------|-------------------|
| Cambodia       | 820            | 1,556             |
| Philippines    | 2,210          | 8,094             |
| Ecuador        | 4,200          | 1,412             |
| Thailand       | 4,440          | 4,550             |
| China          | 4,940          | 1,708             |
| Peru           | 5,150          | 4,419             |
| South Africa   | 6,960          | 15,349            |
| Botswana       | 7,470          | 5,417             |
| Brazil         | 10,720         | 5,954             |
| Russia         | 10,730         | 28,863            |
| Latvia         | 12,350         | 54,873            |
| Estonia        | 15,260         | 16,222            |
| South Korea    | 20,870         | 20,379            |
| United Kingdom | 37,840         | 125,584           |
| United States  | 48,620         | 202,953           |

856

857

858 **Regression analysis**

859 *Methods*

860 TB treatment costs in the 91 LMICs were estimated using regression models informed by the data in  
 861 Tables S9 and S10. Ordinary least squares (OLS) methods have been criticised in relation to cost  
 862 analysis because they produce biased estimates when applied to non-normally distributed dependent  
 863 variables (such as costs, which are usually right skewed) and are sensitive to outliers, especially in  
 864 small datasets (79, 80). Transforming costs towards normality, for example by using a logarithmic  
 865 scale, also has several limitations, arguably the most important being that inferences about log cost  
 866 apply more readily to the geometric mean of costs, instead of to the arithmetic mean, which is of  
 867 interest to economists. Generalised linear models (GLMs) have been advocated in cost analysis as  
 868 they address some of the above problems associated with OLS. GLMs can also easily incorporate  
 869 appropriate distributional assumptions, such as modelling cost data using a log-normal or Gamma  
 870 distribution (80).

871 A GLM with a Gamma distribution and a log link was used to model TB treatment cost per case. The  
 872 natural logarithm of GNI per capita was used as a single predictor of TB treatment costs per patient.  
 873 The regression model was, thus, specified as:

874  
 875 
$$\text{Log}(\overline{\text{cost}}) = \beta_0 + \beta_1 * \text{log}(\text{GNI per capita}), \text{cost} \sim \text{Gamma}$$

876 Where:

877 
$$\overline{\text{cost}} = \text{Expected value of treatment cost per patient}$$

878

879 The GLM regression model was run separately for TB (n=45 countries) and MDR-TB (n=15  
 880 countries) samples and then used to predict TB treatment costs in the 91 LMICs based on their GNI  
 881 values. 95% confidence intervals were calculated for the predicted point estimates of costs:

882

883 
$$L_{95} = \exp(\widehat{\text{cost}} - 1.96 * \text{SE}), U_{95} = \exp(\widehat{\text{cost}} + 1.96 * \text{SE})$$

884 Where:

885  $L_{95}, U_{95} =$  Lower and upper 95% confidence limit, respectively;

886  $\widehat{\text{cost}} =$  Predicted value of treatment cost;

887  $\text{SE} =$  Standard error.

888 Analyses were performed using R 3.0.1 statistical software.

889 *Results*

890 The results of the two regressions are shown in Table S10. Predicted values for the 91 countries are  
 891 presented in Table S11. Observed and predicted costs (with 95% CIs) for DOTS and MDR-TB are  
 892 depicted graphically in Figures S12 and S13, respectively.

893

894 **Table S10. Results of the generalised linear regression models**

|                        | <b>TB (n=46)</b> |                | <b>MDR-TB (n=15)</b> |                |
|------------------------|------------------|----------------|----------------------|----------------|
|                        | <b>Estimate</b>  | <b>p-value</b> | <b>Estimate (SE)</b> | <b>p-value</b> |
| Intercept              | -1.013 (1.128)   | 0.374          | -0.785 (1.775)       | 0.666          |
| Log(GNI per capita)    | 0.986 (0.138)    | <0.001         | 1.156 (0.196)        | <0.001         |
| Null deviance (df)     | 150.61 (44)      |                | 33.17 (14)           |                |
| Residual deviance (df) | 47.03 (43)       |                | 9.12 (13)            |                |
| AIC                    | 720.25           |                | 321.7                |                |

895

896 **Table S11. Predicted treatment costs per patient used in the cost-effectiveness analysis (2012**  
897 **US\$)**

|                      | GNI per capita | TB              |           |           | MDR-TB          |           |           |
|----------------------|----------------|-----------------|-----------|-----------|-----------------|-----------|-----------|
|                      |                | Predicted costs | Lower 95% | Upper 95% | Predicted costs | Lower 95% | Upper 95% |
| Congo, Dem. Rep.     | 190            | 64              | 27        | 152       | 196             | 44        | 872       |
| Somalia              | 200            | 68              | 29        | 158       | 208             | 48        | 908       |
| Burundi              | 250            | 84              | 38        | 186       | 270             | 67        | 1,082     |
| Liberia              | 330            | 111             | 53        | 230       | 372             | 103       | 1,347     |
| Malawi               | 360            | 121             | 59        | 246       | 411             | 117       | 1,443     |
| Niger                | 360            | 121             | 59        | 246       | 411             | 117       | 1,443     |
| Ethiopia             | 370            | 124             | 61        | 251       | 424             | 122       | 1,474     |
| Eritrea              | 430            | 144             | 73        | 282       | 505             | 153       | 1,660     |
| Guinea               | 430            | 144             | 73        | 282       | 505             | 153       | 1,660     |
| Madagascar           | 430            | 144             | 73        | 282       | 505             | 153       | 1,660     |
| Mozambique           | 460            | 153             | 79        | 297       | 546             | 170       | 1,752     |
| Sierra Leone         | 460            | 153             | 79        | 297       | 546             | 170       | 1,752     |
| Afghanistan          | 470            | 157             | 81        | 302       | 559             | 176       | 1,782     |
| Central African Rep. | 480            | 160             | 84        | 307       | 573             | 181       | 1,812     |
| Gambia               | 500            | 167             | 88        | 316       | 601             | 193       | 1,872     |
| Uganda               | 510            | 170             | 90        | 321       | 615             | 199       | 1,901     |
| Nepal                | 540            | 180             | 96        | 336       | 657             | 217       | 1,990     |
| Tanzania             | 540            | 180             | 96        | 336       | 657             | 217       | 1,990     |
| Rwanda               | 570            | 190             | 103       | 350       | 699             | 235       | 2,077     |
| Togo                 | 570            | 190             | 103       | 350       | 699             | 235       | 2,077     |
| Burkina Faso         | 580            | 193             | 105       | 355       | 713             | 242       | 2,106     |
| Guinea-Bissau        | 600            | 199             | 109       | 365       | 742             | 254       | 2,164     |
| Mali                 | 610            | 203             | 111       | 370       | 756             | 261       | 2,193     |
| Zimbabwe             | 660            | 219             | 122       | 393       | 828             | 294       | 2,335     |
| Haiti                | 700            | 232             | 131       | 412       | 886             | 321       | 2,448     |
| Chad                 | 720            | 239             | 135       | 422       | 916             | 335       | 2,504     |
| Bangladesh           | 780            | 258             | 148       | 449       | 1,005           | 378       | 2,670     |
| Benin                | 780            | 258             | 148       | 449       | 1,005           | 378       | 2,670     |
| Myanmar              | 800            | 265             | 153       | 459       | 1,034           | 393       | 2,725     |
| Cambodia             | 820            | 271             | 157       | 468       | 1,064           | 408       | 2,779     |
| Kenya                | 820            | 271             | 157       | 468       | 1,064           | 408       | 2,779     |
| Tajikistan           | 870            | 288             | 169       | 491       | 1,140           | 446       | 2,915     |
| Kyrgyzstan           | 900            | 297             | 175       | 504       | 1,185           | 469       | 2,996     |
| Mauritania           | 1,030          | 340             | 205       | 563       | 1,385           | 574       | 3,341     |
| Senegal              | 1,070          | 353             | 214       | 581       | 1,448           | 608       | 3,446     |
| Pakistan             | 1,120          | 369             | 225       | 604       | 1,510           | 642       | 3,550     |
| Zambia               | 1,160          | 382             | 235       | 622       | 1,542           | 660       | 3,602     |
| Cameroon             | 1,210          | 398             | 246       | 644       | 1,589           | 686       | 3,680     |
| Lesotho              | 1,210          | 398             | 246       | 644       | 1,669           | 731       | 3,809     |

|                  | GNI per capita | TB              |           |           | MDR-TB          |           |           |
|------------------|----------------|-----------------|-----------|-----------|-----------------|-----------|-----------|
|                  |                | Predicted costs | Lower 95% | Upper 95% | Predicted costs | Lower 95% | Upper 95% |
| Djibouti         | 1,270          | 418             | 260       | 671       | 1,765           | 786       | 3,963     |
| Vietnam          | 1,270          | 418             | 260       | 671       | 1,669           | 731       | 3,809     |
| Nigeria          | 1,280          | 421             | 262       | 676       | 1,765           | 786       | 3,963     |
| Ghana            | 1,410          | 463             | 292       | 734       | 1,781           | 795       | 3,989     |
| India            | 1,420          | 466             | 294       | 738       | 1,829           | 823       | 4,065     |
| Papua New Guinea | 1,480          | 486             | 308       | 765       | 1,991           | 918       | 4,318     |
| Nicaragua        | 1,510          | 495             | 315       | 778       | 2,106           | 987       | 4,495     |
| Uzbekistan       | 1,510          | 495             | 315       | 778       | 2,008           | 928       | 4,344     |
| Honduras         | 1,980          | 647             | 423       | 990       | 2,156           | 1,017     | 4,570     |
| Bhutan           | 2,130          | 695             | 457       | 1,058     | 2,948           | 1,517     | 5,731     |
| Philippines      | 2,210          | 721             | 475       | 1,094     | 3,017           | 1,562     | 5,828     |
| Congo, Rep.      | 2,250          | 734             | 484       | 1,113     | 3,208           | 1,688     | 6,096     |
| Sri Lanka        | 2,580          | 840             | 558       | 1,265     | 3,348           | 1,781     | 6,291     |
| Egypt            | 2,600          | 847             | 562       | 1,275     | 3,418           | 1,829     | 6,388     |
| Georgia          | 2,860          | 930             | 619       | 1,397     | 4,111           | 2,305     | 7,333     |
| Guatemala        | 2,870          | 933             | 621       | 1,401     | 4,274           | 2,419     | 7,551     |
| Guyana           | 2,900          | 943             | 628       | 1,416     | 4,310           | 2,444     | 7,600     |
| Indonesia        | 2,940          | 956             | 637       | 1,435     | 4,510           | 2,586     | 7,866     |
| Morocco          | 2,970          | 965             | 643       | 1,449     | 4,510           | 2,586     | 7,866     |
| Paraguay         | 3,020          | 981             | 654       | 1,473     | 4,528           | 2,599     | 7,890     |
| Ukraine          | 3,130          | 1,016           | 677       | 1,525     | 4,583           | 2,638     | 7,963     |
| Jamaica          | 3,300          | 1,071           | 714       | 1,607     | 4,656           | 2,690     | 8,060     |
| Armenia          | 3,360          | 1,090           | 726       | 1,636     | 4,711           | 2,729     | 8,133     |
| Swaziland        | 3,470          | 1,125           | 749       | 1,690     | 4,803           | 2,794     | 8,254     |
| El Salvador      | 3,480          | 1,128           | 751       | 1,695     | 5,006           | 2,940     | 8,522     |
| Fiji             | 3,720          | 1,205           | 801       | 1,813     | 5,061           | 2,980     | 8,595     |
| Angola           | 3,830          | 1,240           | 824       | 1,867     | 5,321           | 3,168     | 8,937     |
| Tunisia          | 4,020          | 1,301           | 863       | 1,962     | 5,433           | 3,250     | 9,083     |
| Ecuador          | 4,200          | 1,358           | 899       | 2,053     | 5,639           | 3,400     | 9,353     |
| Thailand         | 4,440          | 1,435           | 947       | 2,175     | 5,658           | 3,414     | 9,378     |
| Algeria          | 4,470          | 1,444           | 952       | 2,191     | 6,111           | 3,746     | 9,969     |
| Namibia          | 4,700          | 1,518           | 998       | 2,309     | 6,321           | 3,901     | 10,242    |
| China            | 4,940          | 1,594           | 1,044     | 2,434     | 6,608           | 4,113     | 10,616    |
| Peru             | 5,150          | 1,661           | 1,084     | 2,545     | 6,685           | 4,170     | 10,716    |
| Dominican Rep.   | 5,240          | 1,690           | 1,101     | 2,592     | 7,381           | 4,687     | 11,624    |
| Azerbaijan       | 5,290          | 1,705           | 1,111     | 2,619     | 7,498           | 4,774     | 11,777    |
| Serbia           | 5,690          | 1,833           | 1,185     | 2,833     | 7,655           | 4,890     | 11,981    |
| Belarus          | 5,830          | 1,877           | 1,211     | 2,909     | 8,166           | 5,270     | 12,652    |
| Colombia         | 6,070          | 1,953           | 1,255     | 3,040     | 8,205           | 5,300     | 12,704    |
| Bulgaria         | 6,640          | 2,134           | 1,357     | 3,355     | 8,482           | 5,506     | 13,069    |
| South Africa     | 6,960          | 2,235           | 1,414     | 3,535     | 8,941           | 5,845     | 13,675    |
| Botswana         | 7,470          | 2,397           | 1,502     | 3,825     | 9,523           | 6,275     | 14,451    |



|            | GNI per capita | TB              |           |           | MDR-TB          |           |           |
|------------|----------------|-----------------|-----------|-----------|-----------------|-----------|-----------|
|            |                | Predicted costs | Lower 95% | Upper 95% | Predicted costs | Lower 95% | Upper 95% |
| Panama     | 7,470          | 2,397           | 1,502     | 3,825     | 9,181           | 6,023     | 13,995    |
| Gabon      | 8,080          | 2,590           | 1,605     | 4,178     | 10,272          | 6,826     | 15,460    |
| Romania    | 8,140          | 2,609           | 1,615     | 4,213     | 10,763          | 7,183     | 16,127    |
| Kazakhstan | 8,260          | 2,647           | 1,635     | 4,283     | 10,763          | 7,183     | 16,127    |
| Malaysia   | 8,770          | 2,808           | 1,719     | 4,585     | 11,939          | 8,030     | 17,751    |
| Lebanon    | 9,140          | 2,924           | 1,780     | 4,806     | 12,314          | 8,297     | 18,276    |
| Mexico     | 9,420          | 3,013           | 1,825     | 4,974     | 12,607          | 8,504     | 18,689    |
| Turkey     | 10,410         | 3,325           | 1,981     | 5,580     | 12,984          | 8,770     | 19,224    |
| Russia     | 10,650         | 3,400           | 2,018     | 5,728     | 13,427          | 9,079     | 19,857    |
| Brazil     | 10,720         | 3,422           | 2,029     | 5,772     | 13,681          | 9,255     | 20,222    |
| Uruguay    | 11,860         | 3,781           | 2,203     | 6,490     | 14,041          | 9,504     | 20,744    |
| Chile      | 12,280         | 3,913           | 2,266     | 6,759     | 14,894          | 10,086    | 21,995    |

898 **Figure S12. Observed (n=45) and predicted TB treatment costs (2012 US\$)**

899  
900  
901  
902  
903  
904  
905  
906  
907  
908  
909

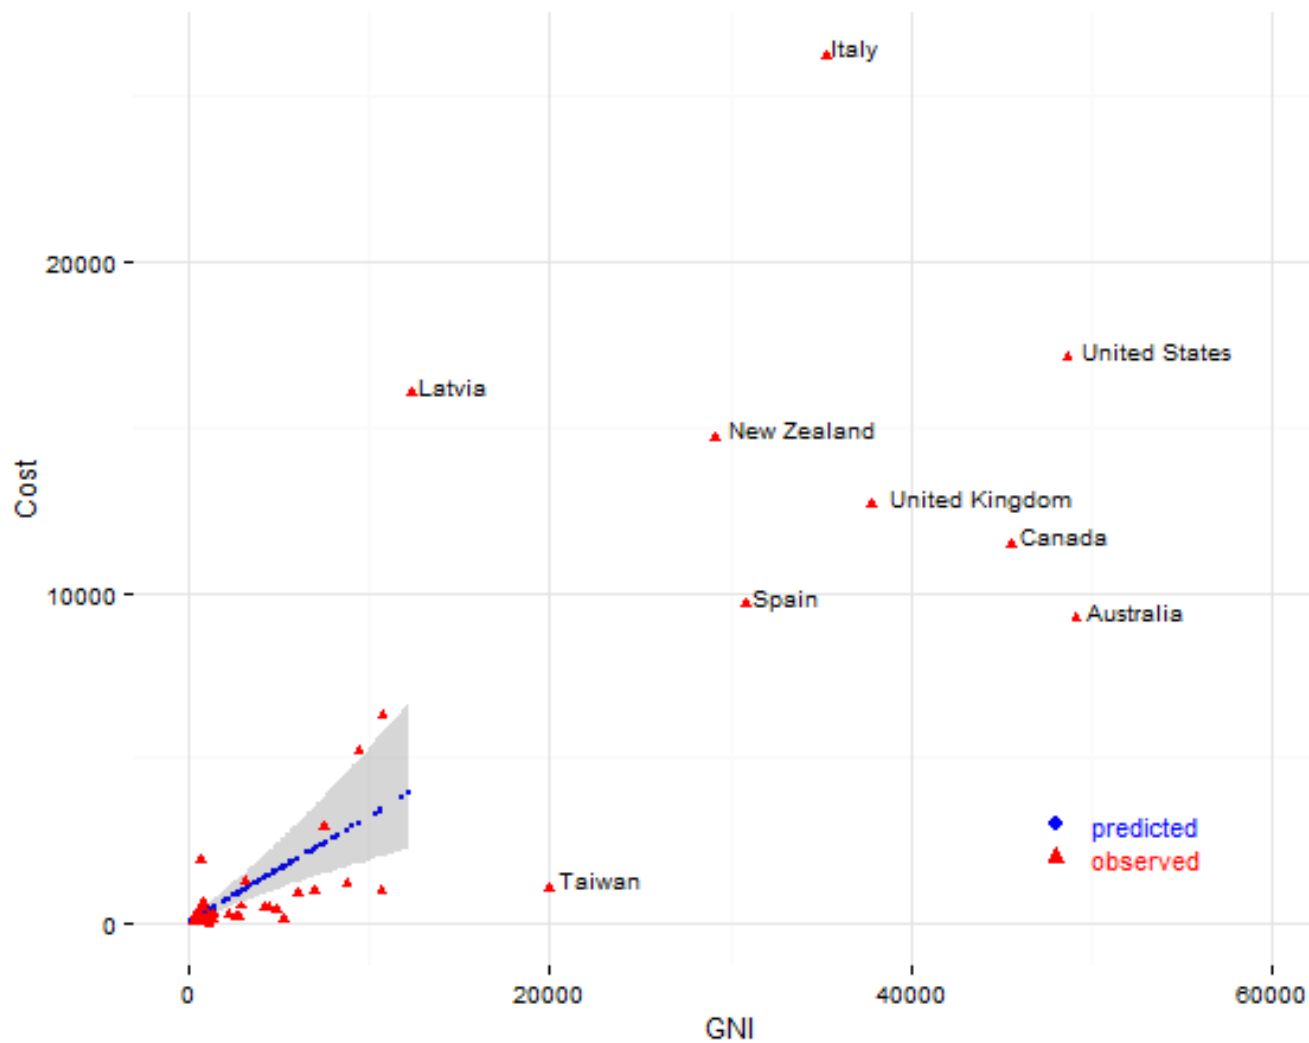

910 **Figure S13. Observed (n=15) and predicted TB-MDR treatment costs per patient (2012 US\$)**

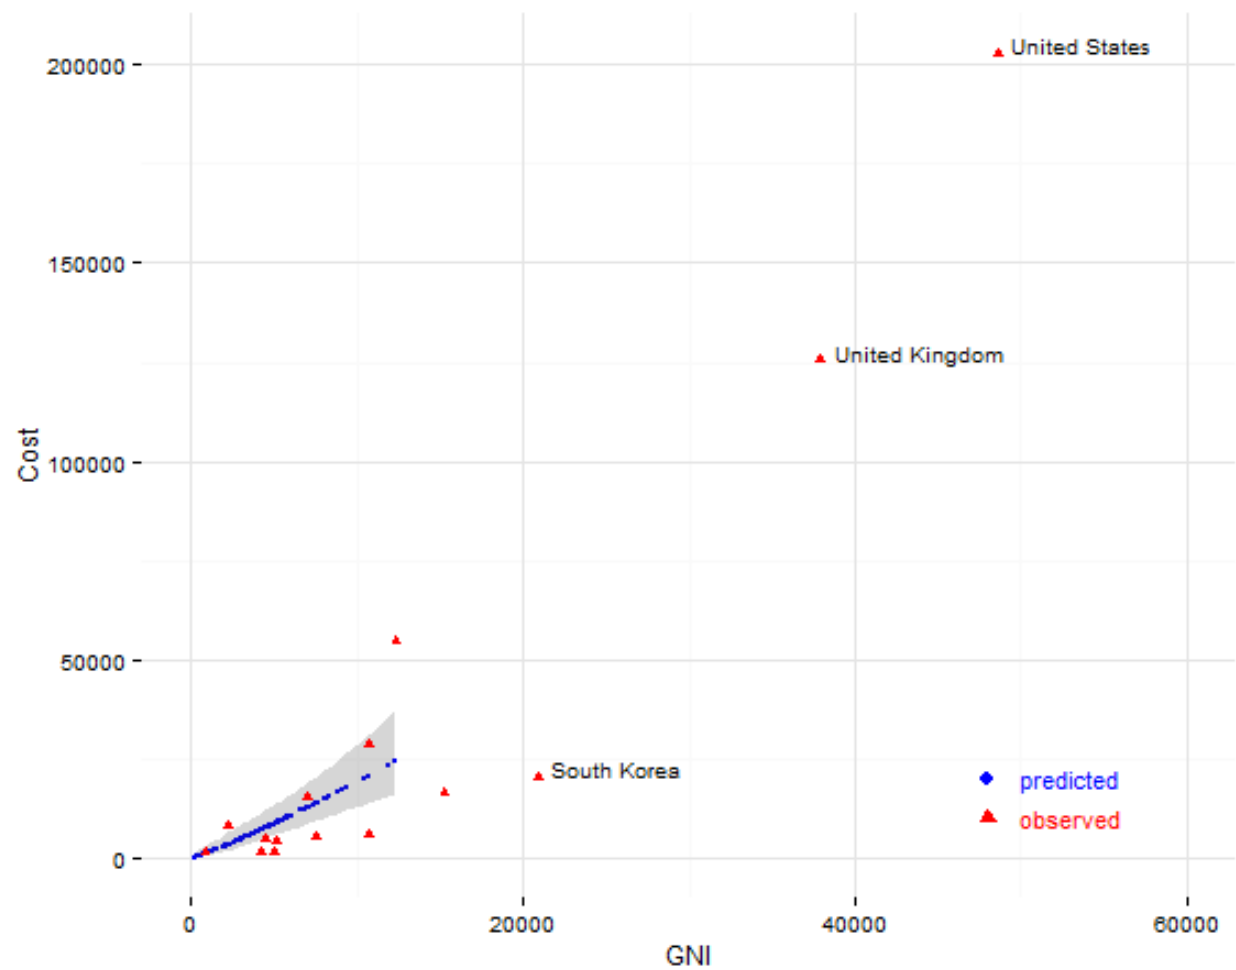

911

912 **(14) Productivity costs**

913 Productivity costs associated with TB morbidity were included in a scenario analysis in the cost-  
 914 effectiveness analysis. We assumed that TB and MDR-TB patients would lose two and six months of  
 915 productive time due to illness, respectively (81, 82). We did not include productivity costs due to  
 916 mortality. We used the human capital method for valuing the potential production not performed due  
 917 to TB morbidity (83). In this approach, either the average, the minimum wage or average earnings in  
 918 the respective country is used for valuing productive time.

919 *Data*

920 The database of the International Labour Organization (ILOSTAT, [www.ilo.org/ilostat](http://www.ilo.org/ilostat)) was used to  
 921 obtain data on the average, nominal monthly earnings. These were estimated as average earnings  
 922 across all economic sectors. The earnings included gross remuneration in kind and in cash received on  
 923 a regular basis by employees, inclusive of annual vacation, paid leave and holidays.

924 2011 monthly earnings were obtained in local currency and converted to US\$ using the average  
 925 exchange rate for 2011. When 2011 data were not available, the most recent estimate was used and  
 926 adjusted for inflation to the 2011 value. For some countries, monthly earnings were not available, and  
 927 hourly, daily, weekly or annual earnings were given. In such instances, the following assumptions  
 928 were used to derive monthly rates: eight working hours/day, five working days/week and 22 working  
 929 days/calendar month. Income data were available for 36 countries in the ILO database (Table S12).

930

931 **Table S12. Yearly earnings and GNI per capita for 36 countries (2011 US\$)**

| <b>Country</b> | <b>Earnings</b> | <b>GNI per capita</b> |
|----------------|-----------------|-----------------------|
| Ethiopia       | 879             | 370                   |
| Madagascar     | 4012            | 430                   |
| Tajikistan     | 653             | 870                   |
| Kyrgyzstan     | 1728            | 880                   |
| Uzbekistan     | 858             | 1510                  |
| Philippines    | 2265            | 2210                  |
| Sri Lanka      | 1602            | 2580                  |
| Georgia        | 4311            | 2860                  |
| Guyana         | 5539            | 2900                  |
| Indonesia      | 1784            | 2940                  |
| Paraguay       | 4441            | 3020                  |
| Ukraine        | 4492            | 3130                  |
| Armenia        | 3386            | 3360                  |
| El Salvador    | 3505            | 3480                  |
| Egypt          | 3590            | 4200                  |
| Ecuador        | 5434            | 4200                  |
| China          | 4885            | 4940                  |
| Azerbaijan     | 4824            | 5290                  |
| Serbia         | 9507            | 5690                  |
| Belarus        | 3156            | 5830                  |
| Colombia       | 5467            | 6070                  |

| Country        | Earnings | GNI per capita |
|----------------|----------|----------------|
| Bulgaria       | 4891     | 6530           |
| Dominican Rep. | 3852     | 7030           |
| Panama         | 7280     | 7470           |
| Botswana       | 8198     | 7470           |
| Romania        | 7044     | 7910           |
| Kazakhstan     | 6087     | 8260           |
| Mexico         | 5279     | 9420           |
| Brazil         | 9664     | 10720          |
| Russia         | 9296     | 10730          |
| Uruguay        | 13460    | 11860          |
| Chile          | 13425    | 12280          |
| Latvia         | 11376    | 12350          |
| United Kingdom | 48015    | 37840          |
| Canada         | 46305    | 45560          |
| United States  | 39948    | 48620          |

932

933 *Regression analysis*

934 An OLS regression model was run with the available average earnings data as dependent variable and  
 935 GNI per capita as the independent variable. The regression equation was used to predict monthly  
 936 earnings for the 91 LMICs considered in the cost-effectiveness analysis. The regression model was:

937

938 Monthly earnings =  $\beta_0 + \beta_1 \cdot \text{GNI per capita}$

939

940 *Results*

941 The results of the regression model are presented in Table S13. The model used for prediction was:

942 Earnings = 11.726 + 0.081 \* GNI per capita

943

944 Predicted monthly earnings for the 91 countries are presented in Table S14.

945

946 **Table S13. Results of the earnings OLS regression model**

|                    | Estimate (SE)   | p-value |
|--------------------|-----------------|---------|
| Intercept          | 11.726 (49.825) | 0.815   |
| GNI per capita     | 0.081 (0.004)   | <0.001  |
| Adjusted R-squared | 0.94            |         |

947

948

949 **Table S14. Predicted average monthly earnings (2011 US\$)**

| Country          | GNI per capita | Earnings | Country     | GNI per capita | Earnings |
|------------------|----------------|----------|-------------|----------------|----------|
| Congo, Dem. Rep. | 190            | 27       | Honduras    | 1980           | 174      |
| Somalia          | 200            | 28       | Bhutan      | 2130           | 186      |
| Burundi          | 250            | 32       | Philippines | 2210           | 193      |
| Liberia          | 330            | 39       | Congo, Rep. | 2250           | 196      |
| Malawi           | 360            | 41       | Sri Lanka   | 2580           | 223      |
| Niger            | 360            | 41       | Egypt       | 2600           | 225      |

|                          |      |     |                    |       |      |
|--------------------------|------|-----|--------------------|-------|------|
| Ethiopia                 | 370  | 42  | Georgia            | 2860  | 246  |
| Eritrea                  | 430  | 47  | Guyana             | 2900  | 249  |
| Guinea                   | 430  | 47  | Indonesia          | 2940  | 252  |
| Madagascar               | 430  | 47  | Morocco            | 2970  | 255  |
| Mozambique               | 460  | 49  | Paraguay           | 3020  | 259  |
| Sierra Leone             | 460  | 49  | Ukraine            | 3130  | 268  |
| Afghanistan              | 470  | 50  | Jamaica            | 3300  | 282  |
| Central African Republic | 480  | 51  | Armenia            | 3360  | 287  |
| Gambia                   | 500  | 53  | Swaziland          | 3470  | 296  |
| Uganda                   | 510  | 53  | El Salvador        | 3480  | 297  |
| Nepal                    | 540  | 56  | Fiji               | 3720  | 316  |
| Tanzania                 | 540  | 56  | Angola             | 3830  | 325  |
| Rwanda                   | 570  | 58  | Tunisia            | 4020  | 341  |
| Togo                     | 570  | 58  | Ecuador            | 4200  | 356  |
| Burkina Faso             | 580  | 59  | Thailand           | 4440  | 375  |
| Guinea-Bissau            | 600  | 61  | Algeria            | 4470  | 378  |
| Mali                     | 610  | 62  | Namibia            | 4700  | 397  |
| Zimbabwe                 | 660  | 66  | China              | 4940  | 416  |
| Chad                     | 720  | 71  | Peru               | 5150  | 433  |
| Bangladesh               | 780  | 76  | Argentina          | 5170  | 435  |
| Benin                    | 780  | 76  | Dominican Republic | 5240  | 441  |
| Myanmar                  | 800  | 77  | Serbia             | 5690  | 478  |
| Cambodia                 | 820  | 79  | Belarus            | 5830  | 489  |
| Kenya                    | 820  | 79  | Colombia           | 6070  | 509  |
| Tajikistan               | 870  | 83  | Bulgaria           | 6640  | 555  |
| Kyrgyzstan               | 900  | 85  | South Africa       | 6960  | 582  |
| Mauritania               | 1030 | 96  | Panama             | 7470  | 623  |
| Senegal                  | 1070 | 99  | Botswana           | 7470  | 623  |
| Pakistan                 | 1120 | 103 | Gabon              | 8080  | 673  |
| Zambia                   | 1160 | 107 | Romania            | 8140  | 678  |
| Cameroon                 | 1210 | 111 | Kazakhstan         | 8260  | 688  |
| Lesotho                  | 1210 | 111 | Malaysia           | 8770  | 730  |
| Vietnam                  | 1270 | 116 | Lebanon            | 9140  | 760  |
| Djibouti                 | 1270 | 116 | Mexico             | 9420  | 783  |
| Nigeria                  | 1280 | 117 | Turkey             | 10410 | 864  |
| Ghana                    | 1410 | 127 | Russia             | 10650 | 884  |
| India                    | 1420 | 128 | Brazil             | 10720 | 889  |
| Papua New Guinea         | 1480 | 133 | Uruguay            | 11860 | 983  |
| Uzbekistan               | 1510 | 135 | Chile              | 12280 | 1017 |
| Nicaragua                | 1510 | 135 |                    |       |      |

950

951

952 Observed and predicted earnings are depicted in Figure S14.

953

954  
955

**Figure S14. Observed (n=36) and predicted monthly earnings (2011 US\$)**

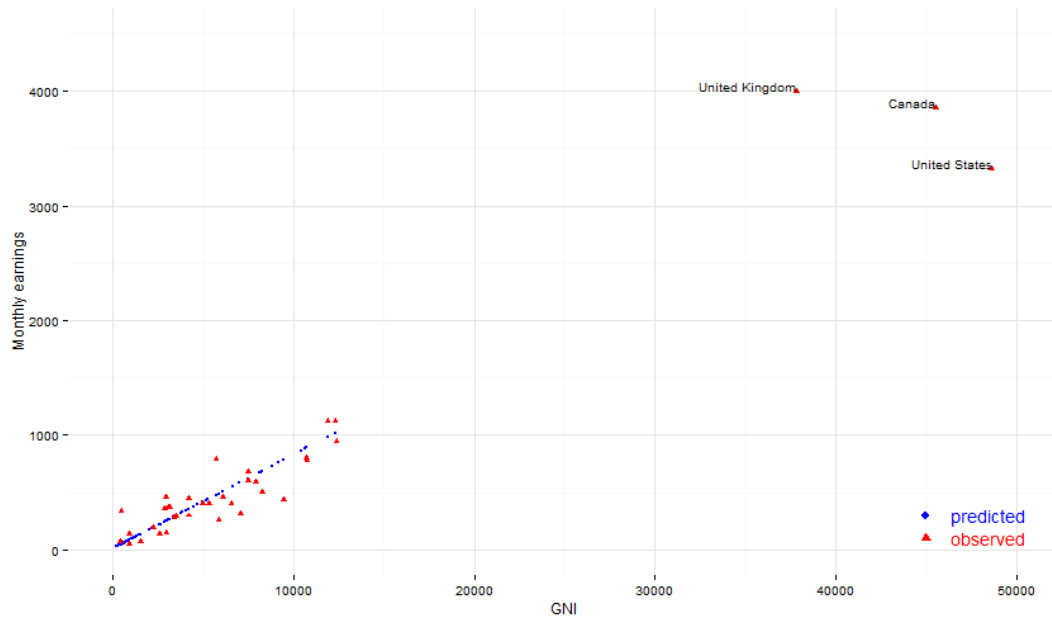

956  
957

## References

- 958  
959
- 960 1. Trunz BB, Fine P, & Dye C (2006) Effect of BCG vaccination on childhood  
961 tuberculous meningitis and miliary tuberculosis worldwide: a meta-analysis and  
962 assessment of cost-effectiveness. *Lancet* 367(9517):1173-1180.
  - 963 2. R (2005) R: A Language and Environment (R Foundation for Statistical  
964 Computing (<http://www.r-project.org/>), Vienna, Austria).
  - 965 3. Department of Economics and Social Affairs PD (2011) World Population  
966 Prospects: The 2010 Revision. ed United Nations (New York).
  - 967 4. WHO (2011) *Global Tuberculosis Control*.
  - 968 5. WHO (2013) *Global Tuberculosis Control*.
  - 969 6. UNAIDS (2013) Know your epidemic.
  - 970 7. Lin HH, Dowdy D, Dye C, Murray M, & Cohen T (2012) The impact of new  
971 tuberculosis diagnostics on transmission: why context matters. *Bulletin of the*  
972 *World Health Organization* 90(10):739-747A.
  - 973 8. Eaton JW, *et al.* (2012) HIV Treatment as Prevention: Systematic Comparison of  
974 Mathematical Models of the Potential Impact of Antiretroviral Therapy on HIV  
975 Incidence in South Africa. *PLoS medicine* 9(7).
  - 976 9. World Bank (2012) How we classify countries.
  - 977 10. Stoeberl K & Thole J (2013) TB Vaccine Research and Development: A Business  
978 Case for Investment. (AERAS, TBVI).
  - 979 11. Centers for Disease C & Prevention (2013) Rubella and congenital rubella  
980 syndrome control and elimination - global progress, 2000-2012. *MMWR.*  
981 *Morbidity and mortality weekly report* 62(48):983-986.
  - 982 12. Centers for Disease C & Prevention (2012) Serogroup A meningococcal  
983 conjugate vaccine coverage after the first national mass immunization  
984 campaign-Burkina Faso, 2011. *MMWR. Morbidity and mortality weekly report*  
985 61(50):1022-1024.
  - 986 13. Teixeira AM, *et al.* (2011) Brazilian experience with rapid monitoring of  
987 vaccination coverage during a national rubella elimination campaign. *Revista*  
988 *panamericana de salud publica = Pan American journal of public health* 30(1):7-  
989 14.
  - 990 14. AERAS (2013) Planning for Adult Vaccination in Middle and Low Income  
991 Countries, HIV, TB, and Malaria Workshop. September 4-5 2013.
  - 992 15. Hokey DA, *et al.* (2014) A nonhuman primate toxicology and immunogenicity  
993 study evaluating aerosol delivery of AERAS-402/Ad35 Vaccine: Evidence for  
994 transient t cell responses in peripheral blood and robust sustained responses in  
995 the lungs. *Human vaccines & immunotherapeutics* 10(8).
  - 996 16. WHO. Immunization VaB (2013) Retrospective Measles Data on Supplementary  
997 Immunization Activities 2000-2013., in *Data, statistics and graphics*  
998 ([http://www.who.int/immunization/monitoring\\_surveillance/data/en/](http://www.who.int/immunization/monitoring_surveillance/data/en/)).
  - 999 17. Schenzle D (1984) An age-structured model of pre- and post-vaccination  
1000 measles transmission. *Math Med Biol* 1(2):169 - 191.
  - 1001 18. Dye C, Garnett GP, Sleeman K, & Williams BG (1998) Prospects for worldwide  
1002 tuberculosis control under the WHO DOTS strategy. Directly observed short-  
1003 course therapy. *Lancet* 352(9144):1886-1891.
  - 1004 19. Williams BG & Dye C (2003) Antiretroviral drugs for tuberculosis control in the  
1005 era of HIV/AIDS. *Science* 301(5639):1535-1537.
  - 1006 20. Nunn AJ, *et al.* (1997) Mortality associated with HIV-1 infection over five years in  
1007 a rural Ugandan population: cohort study. *BMJ* 315(7111):767-771.
  - 1008 21. Mahy M, *et al.* (2010) Derivation of parameters used in Spectrum for eligibility  
1009 for antiretroviral therapy and survival on antiretroviral therapy. *Sexually*  
1010 *transmitted infections* 86 Suppl 2:ii28-34.



- 1011 22. Walensky RP, *et al.* (2010) Scaling up the 2010 World Health Organization HIV  
1012 Treatment Guidelines in resource-limited settings: a model-based analysis. *PLoS*  
1013 *medicine* 7(12):e1000382.
- 1014 23. de Vries-Sluijs TE, *et al.* (2011) A randomized controlled study of accelerated  
1015 versus standard hepatitis B vaccination in HIV-positive patients. *The Journal of*  
1016 *infectious diseases* 203(7):984-991.
- 1017 24. Wilson CM, *et al.* (2001) Serologic response to hepatitis B vaccine in HIV infected  
1018 and high-risk HIV uninfected adolescents in the REACH cohort. Reaching for  
1019 Excellence in Adolescent Care and Health. *The Journal of adolescent health :*  
1020 *official publication of the Society for Adolescent Medicine* 29(3 Suppl):123-129.
- 1021 25. Marjoram P, Molitor J, Plagnol V, & Tavaré S (2003) Markov chain Monte Carlo  
1022 without likelihoods. *PNAS* 100(26):15324-15328.
- 1023 26. Abu-Raddad LJ, *et al.* (2009) Epidemiological benefits of more-effective  
1024 tuberculosis vaccines, drugs, and diagnostics. *Proceedings of the National*  
1025 *Academy of Sciences of the United States of America* 106(33):13980-13985.
- 1026 27. Suthar AB, *et al.* (2012) Antiretroviral Therapy for Prevention of Tuberculosis in  
1027 Adults with HIV: A Systematic Review and Meta-Analysis. *PLoS medicine*  
1028 9(7):e1001270.
- 1029 28. Sutherland I (1976) Recent studies in the epidemiology of tuberculosis, based on  
1030 the risk of being infected with tubercle bacilli. *Advances in tuberculosis research.*  
1031 *Fortschritte der Tuberkuloseforschung. Progres de l'exploration de la tuberculose*  
1032 19:1-63.
- 1033 29. Ferebee SH (1970) Controlled chemoprophylaxis trials in tuberculosis. A general  
1034 review. *Bibliotheca tuberculosea* 26:28-106.
- 1035 30. Comstock GW (1982) Epidemiology of tuberculosis. *The American review of*  
1036 *respiratory disease* 125(3 Pt 2):8-15.
- 1037 31. Vynnycky E & Fine PE (1997) The natural history of tuberculosis: the  
1038 implications of age-dependent risks of disease and the role of reinfection.  
1039 *Epidemiology and infection* 119(2):183-201.
- 1040 32. Sutherland I (1968) The ten-year incidence of clinical tuberculosis following  
1041 'conversion' in 2,550 individuals aged 14 to 19 years. in *Tuberculosis Surveillance*  
1042 *and Research Unit Progress Report* ed The Hague RNTAK.
- 1043 33. Vynnycky E (1996) An Investigation of the Transmission Dynamics of *M.*  
1044 *tuberculosis.* (University of London).
- 1045 34. Krishnamurthy VNS, Nair S, & Gothi G (1976) Incidence of tuberculosis among  
1046 newly infected populations and in relation to the duration of infected status.  
1047 *Indian Journal of Tuberculosis* 33:1-3.
- 1048 35. Krishnamurthy VV & Chaudhuri K (1990) Risk of pulmonary tuberculosis  
1049 associated with exogenous reinfection and endogenous reactivation in a south  
1050 Indian rural population: A mathematical estimate. *Indian Journal of Tuberculosis*  
1051 37:65-67.
- 1052 36. Sutherland I, Svandova E, & Radhakrishna S (1982) The development of clinical  
1053 tuberculosis following infection with tubercle bacilli. 1. A theoretical model for  
1054 the development of clinical tuberculosis following infection, linking from data on  
1055 the risk of tuberculous infection and the incidence of clinical tuberculosis in the  
1056 Netherlands. *Tubercle* 63(4):255-268.
- 1057 37. Horwitz O (1969) Public health aspects of relapsing tuberculosis. *The American*  
1058 *review of respiratory disease* 99(2):183-193.
- 1059 38. Styblo K (1991) *Epidemiology of Tuberculosis. Selected papers* (Royal  
1060 Netherlands Tuberculosis Association, The Hague (the Netherlands)).
- 1061 39. Barnett GD, Grzybowski S, & Styblo K (1971) [The current risk of contracting  
1062 evolutive tuberculosis, in Saskatchewan, according to the state of previous  
1063 tuberculin tests and x-ray image]. *Bulletin of the International Union against*  
1064 *Tuberculosis* 45:55-79.

- 1065 40. Murphy BM, Singer BH, Anderson S, & Kirschner D (2002) Comparing epidemic  
1066 tuberculosis in demographically distinct heterogeneous populations.  
1067 *Mathematical biosciences* 180:161-185.
- 1068 41. Espinal MA, *et al.* (1996) Human immunodeficiency virus infection in children  
1069 with tuberculosis in Santo Domingo, Dominican Republic: prevalence, clinical  
1070 findings, and response to antituberculosis treatment. *Journal of acquired immune*  
1071 *deficiency syndromes and human retrovirology : official publication of the*  
1072 *International Retrovirology Association* 13(2):155-159.
- 1073 42. De Cock KM, *et al.* (1991) Risk of tuberculosis in patients with HIV-I and HIV-II  
1074 infections in Abidjan, Ivory Coast. *BMJ* 302(6775):496-499.
- 1075 43. Meeran K (1989) Prevalence of HIV infection among patients with leprosy and  
1076 tuberculosis in rural Zambia. *BMJ* 298(6670):364-365.
- 1077 44. Sassan-Morokro M, *et al.* (1994) Tuberculosis and HIV infection in children in  
1078 Abidjan, Cote d'Ivoire. *Transactions of the Royal Society of Tropical Medicine and*  
1079 *Hygiene* 88(2):178-181.
- 1080 45. Nunn P, *et al.* (1994) The effect of human immunodeficiency virus type-1 on the  
1081 infectiousness of tuberculosis. *Tubercle and lung disease : the official journal of*  
1082 *the International Union against Tuberculosis and Lung Disease* 75(1):25-32.
- 1083 46. Cauthen GM, *et al.* (1996) Transmission of Mycobacterium tuberculosis from  
1084 tuberculosis patients with HIV infection or AIDS. *American journal of*  
1085 *epidemiology* 144(1):69-77.
- 1086 47. Githui W, *et al.* (1992) Cohort study of HIV-positive and HIV-negative  
1087 tuberculosis, Nairobi, Kenya: comparison of bacteriological results. *Tubercle and*  
1088 *lung disease : the official journal of the International Union against Tuberculosis*  
1089 *and Lung Disease* 73(4):203-209.
- 1090 48. Colebunders RL, *et al.* (1989) HIV infection in patients with tuberculosis in  
1091 Kinshasa, Zaire. *The American review of respiratory disease* 139(5):1082-1085.
- 1092 49. Tiemersma EW, van der Werf MJ, Borgdorff MW, Williams BG, & Nagelkerke NJ  
1093 (2011) Natural history of tuberculosis: duration and fatality of untreated  
1094 pulmonary tuberculosis in HIV negative patients: a systematic review. *PloS one*  
1095 6(4):e17601.
- 1096 50. Corbett EL, *et al.* (2003) The growing burden of tuberculosis: global trends and  
1097 interactions with the HIV epidemic. *Archives of internal medicine* 163(9):1009-  
1098 1021.
- 1099 51. Mukadi YD, Maher D, & Harries A (2001) Tuberculosis case fatality rates in high  
1100 HIV prevalence populations in sub-Saharan Africa. *AIDS* 15(2):143-152.
- 1101 52. Lindhart M (1939) The statistics of pulmonary tuberculosis in Denmark, 1925-  
1102 1934. A statistical investigation of the occurrence of pulmonary tuberculosis in  
1103 the period 1925-1934, worked out on the basis of the Danish National Health  
1104 Service File of notified cases and deaths. (Ejnar, Munksgaard, Copenhagen).
- 1105 53. Murray CSK & Rouillon A (1993) *Tuberculosis*. (Oxford University Press).
- 1106 54. Nunn P, *et al.* (1992) Cohort study of human immunodeficiency virus infection in  
1107 patients with tuberculosis in Nairobi, Kenya. Analysis of early (6-month)  
1108 mortality. *The American review of respiratory disease* 146(4):849-854.
- 1109 55. Nunn P & Felten M (1994) Surveillance of resistance to antituberculosis drugs in  
1110 developing countries. *Tubercle and lung disease : the official journal of the*  
1111 *International Union against Tuberculosis and Lung Disease* 75(3):163-167.
- 1112 56. Edlin BR, *et al.* (1992) An outbreak of multidrug-resistant tuberculosis among  
1113 hospitalized patients with the acquired immunodeficiency syndrome. *The New*  
1114 *England journal of medicine* 326(23):1514-1521.
- 1115 57. Allen S, *et al.* (1992) Two-year incidence of tuberculosis in cohorts of HIV-  
1116 infected and uninfected urban Rwandan women. *The American review of*  
1117 *respiratory disease* 146(6):1439-1444.

- 1118 58. Mulder DW, *et al.* (1994) Two-year HIV-1-associated mortality in a Ugandan  
1119 rural population. *Lancet* 343(8904):1021-1023.
- 1120 59. Perriens JH, *et al.* (1995) Pulmonary tuberculosis in HIV-infected patients in  
1121 Zaire. A controlled trial of treatment for either 6 or 12 months. *The New England*  
1122 *journal of medicine* 332(12):779-784.
- 1123 60. Whalen C, *et al.* (1995) Accelerated course of human immunodeficiency virus  
1124 infection after tuberculosis. *American journal of respiratory and critical care*  
1125 *medicine* 151(1):129-135.
- 1126 61. Dye C, Glaziou P, Floyd K, & Raviglione M (2012) Prospects for Tuberculosis  
1127 Elimination. *Annual review of public health* 34:271-286.
- 1128 62. Griffiths UK, Korczak VS, Ayalew D, & Yigzaw A (2009) Incremental system costs  
1129 of introducing combined DTwP-hepatitis B-Hib vaccine into national  
1130 immunization services in Ethiopia. *Vaccine* 27(9):1426-1432.
- 1131 63. GAVI A (2013) Guidelines for applications, New and underused vaccines  
1132 support.
- 1133 64. UNICEF (2011) Childinfo, Monitoring the Situation of Children and Women.
- 1134 65. Iman RL, Helton JC, & Campbell JE (1981) An Approach to Sensitivity Analysis of  
1135 Computer-Models .2. Ranking of Input Variables, Response-Surface Validation,  
1136 Distribution Effect and Technique Synopsis. *J Qual Technol* 13(4):232-240.
- 1137 66. Iman RL, Helton JC, & Campbell JE (1981) An Approach to Sensitivity Analysis of  
1138 Computer-Models .1. Introduction, Input Variable Selection and Preliminary  
1139 Variable Assessment. *J Qual Technol* 13(3):174-183.
- 1140 67. Menzies NA, Cohen T, Lin HH, Murray M, & Salomon JA (2012) Population health  
1141 impact and cost-effectiveness of tuberculosis diagnosis with Xpert MTB/RIF: a  
1142 dynamic simulation and economic evaluation. *PLoS medicine* 9(11):e1001347.
- 1143 68. Tanser F, Barnighausen T, Grapsa E, Zaidi J, & Newell ML (2013) High coverage  
1144 of ART associated with decline in risk of HIV acquisition in rural KwaZulu-Natal,  
1145 South Africa. *Science* 339(6122):966-971.
- 1146 69. Murray CJL, *et al.* (2012) GBD 2010: design, definitions, and metrics. *Lancet*  
1147 380(9859):2063-2066.
- 1148 70. Salomon JA, *et al.* (2012) Common values in assessing health outcomes from  
1149 disease and injury: disability weights measurement study for the Global Burden  
1150 of Disease Study 2010. *Lancet* 380(9859):2129-2143.
- 1151 71. Wilson P (2010) Giving developing countries the best shot: An overview of  
1152 vaccine access and R&D. eds Oxfam & Medecins sans Frontieres.
- 1153 72. Unicef (2014) Vaccine price data.  
1154 [http://www.unicef.org/supply/index\\_57476.html](http://www.unicef.org/supply/index_57476.html).
- 1155 73. Griffiths UK, Clark A, & Hajjeh R (2013) Cost-effectiveness of Haemophilus  
1156 influenzae type b conjugate vaccine in low- and middle-income countries:  
1157 regional analysis and assessment of major determinants. *The Journal of*  
1158 *pediatrics* 163(1 Suppl):S50-S59 e59.
- 1159 74. Gandhi G & Lydon P (2014) Updating the evidence base on the operational costs  
1160 of supplementary immunization activities for current and future accelerated  
1161 disease control, elimination and eradication efforts. *BMC public health* 14(1):67.
- 1162 75. Mvundura M, *et al.* (2014) How much does it cost to get a dose of vaccine to the  
1163 service delivery location? Empirical evidence from Vietnam's Expanded Program  
1164 on Immunization. *Vaccine* 32(7):834-838.
- 1165 76. Levin CE, *et al.* (2013) Delivery cost of human papillomavirus vaccination of  
1166 young adolescent girls in Peru, Uganda and Viet Nam. *Bulletin of the World*  
1167 *Health Organization* 91(8):585-592.
- 1168 77. Adam T, Evans DB, & Murray CJ (2003) Econometric estimation of country-  
1169 specific hospital costs. *Cost effectiveness and resource allocation : C/E* 1(1):3.
- 1170 78. Laurence Y, Griffiths, U.K., Vassall, A. (Forthcoming) Costs to health services and  
1171 the patient of treating tuberculosis: A systematic literature review.

- 1172 79. Polsky D & Glick H (2009) Costing and Cost Analysis in Randomised Trials:  
1173 Caveat Emptor. *PharmacoEconomics* 27(3):179-188.
- 1174 80. Manning WG & Mullahy J (2001) Estimating log models: to transform or not to  
1175 transform? *Journal of Health Economics* 20(4):461-494.
- 1176 81. Sawert H, *et al.* (1997) Costs and benefits of improving tuberculosis control: the  
1177 case of Thailand. *Social science & medicine* 44(12):1805-1816.
- 1178 82. Rouzier VA, Oxlade O, Verduga R, Gresely L, & Menzies D (2010) Patient and  
1179 family costs associated with tuberculosis, including multidrug-resistant  
1180 tuberculosis, in Ecuador. *The international journal of tuberculosis and lung  
1181 disease : the official journal of the International Union against Tuberculosis and  
1182 Lung Disease* 14(10):1316-1322.
- 1183 83. Krol M, Brouwer W, & Rutten F (2013) Productivity costs in economic  
1184 evaluations: past, present, future. *PharmacoEconomics* 31(7):537-549.
